# Supplementary material for: Brr6 plays a role in gene recruitment and transcriptional regulation at the nuclear envelope
Source: PubMed Central journal article supplement — Mol Biol Cell. 2018 Oct 15;29(21):2578–90. doi: 10.1091/mbc.E18-04-0258 (PMC6254580; doi:10.1091/mbc.e18-04-0258), 2018-10-15
Supplement: mbc-29-2578-s001.pdf [file mbc-29-2578-s001.pdf]

# Supplemental Materials

*Molecular Biology of the Cell*

Kops et al.

## SUPPLEMENTAL RESULTS/DISCUSSION

### **RNAseq analysis revealed CHIII disomy in *brr6-1*.**

Mapping the chromosomal locations of the genes affected in *brr6-1* in galactose and glucose (Supplemental Figure 5A and B) showed that expression increased approximately 2-fold for many genes across CHIII, but not other chromosomes, suggesting disomy at CHIII. To test this possibility, we carried out QPCR on 3 biological replicates of genomic DNA from wild type (YPH399) and two different *brr6-1* strains (yDBK166 and yDBK168) where the mutation had been integrated independently. We used primer sets against 2 genes on CHIII and CHV and a single primer set for all other chromosomes. Wild type DNA showed comparable levels for all chromosomes. In contrast, DNA from both *brr6-1* strains showed 2x levels of both genes on CHIII but not CHV compared with wild type, consistent with stably maintained disomy at CHIII (Supplemental Figure 6A). This effect was not observed for other chromosomes although in some cases (eg. CHI and CHXIV), an intermediate level (1.3-1.5x wild type levels) was observed. The intermediate values occurred when one biological replicate showed higher levels, resulting in an intermediate value and larger error. It is possible that this reflects transient duplication of other chromosomes where, unlike CHIII, disomy is not maintained.

Disomic budding yeast strains have been shown to exhibit characteristic gene expression changes independent of the identity of the duplicated chromosome (Torres et al., 2007), including increased expression of genes linked to ribosomal RNA biogenesis and decreased expression of carbohydrate metabolism genes. Therefore, we asked if *brr6-1* showed similar patterns. Genes with altered expression in *brr6-1* also show enrichment in these processes compared with the whole genome, but in contrast to the typical disomic pattern genes related to

ribosome biogenesis show decreased expression while carbohydrate metabolism genes show both increased and decreased expression equivalently (Figure 6B). Interestingly, the *brr6-1* data also shows enrichment for genes involved in lipid metabolism, consistent with the previously reported altered lipid homeostasis in the mutant (Lone et al., 2015; Scarcelli et al., 2007). Although increased copy number of CHIII genes resulting from disomy could underlie genome-wide expression changes in *brr6-1*, the divergence of the *brr6-1* effects from the typical disomic pattern suggests that some of these effects may come from the *brr6-1* mutation itself.

**Table S1 Yeast Strains Used in this Study**

| <b>Strain</b>   | <b>Relevant Genotype</b>                                                                                                                                 | <b>Source</b>                    |
|-----------------|----------------------------------------------------------------------------------------------------------------------------------------------------------|----------------------------------|
| W303            | <i>MAT<math>\alpha</math> leu2-3,112 trp1-1 can1-100 ura3-1 ade2-1 his3-11,15</i>                                                                        | Gift from I. Herskowitz          |
| yDBK165         | <i>BRR6:LEU:HIS3 haploid</i> (W303 <i>MAT<math>\alpha</math></i> background)                                                                             | (de Bruyn Kops and Guthrie 2001) |
| yDBK166         | <i>brr6-1:LEU:HIS3 haploid</i> (W303 <i>MAT<math>\alpha</math></i> background)                                                                           | (de Bruyn Kops and Guthrie 2001) |
| YPH399          | <i>MAT<math>\alpha</math> Trp1-63,leu2-1,ura3-52,ade2-10, lys2-801</i>                                                                                   | Gift from P. Hieter              |
| yDBK168         | <i>brr6-1:LEU:HIS3 haploid</i> ( <i>brr6-1</i> integrated into yDBK123, YPH399 <i>MAT<math>\alpha</math></i> background (de Bruyn Kops & Guthrie, 2001)) | This study                       |
| yDBK169         | <i>MAT<math>\alpha</math> leu2-3,112 trp1-1 can1-100 ura3-1 ade2-1 his3-11,15, brr6-1:LEU:HIS3, <math>\Delta</math>hda1::KAN</i>                         | This study                       |
| yDBK170         | <i>brr6-1</i> isolate from cs bank outcrossed to YPH399                                                                                                  | de Bruyn Kops and Guthrie 2001)  |
| yDBK155         | <i>MAT<math>\alpha</math> leu2-3,112 trp1-1 can1-100 ura3-1 ade2-1 his3-11,15, pSE358-BRR6 (TRP1)</i>                                                    | (de Bruyn Kops and Guthrie 2001) |
| yDBK192         | <i>MAT<math>\alpha</math> leu2-3,112 trp1-1 can1-100 ura3-1 ade2-1 his3-11,15, pJL602-BRR6 (LEU2)</i>                                                    | (de Bruyn Kops and Guthrie 2001) |
| <i>NIC96GFP</i> | <i>NIC96GFP:HIS3 haploid</i>                                                                                                                             | (Huh et al. 2003)                |
| <i>PAB1GFP</i>  | <i>PAB1GFP:HIS3 haploid</i>                                                                                                                              | (Huh et al. 2003)                |
| yDBK398         | <i>PABGFP:HIS3, BRR6 haploid</i> derived from crossing yDBK170 and <i>PAB1GFP</i>                                                                        | This study                       |
| yDBK399         | <i>PABGFP:HIS3, brr6-1 haploid</i> derived from crossing yDBK170 and <i>PAB1GFP</i>                                                                      | This study                       |
| yDBK400         | <i>LAC O:PAB1GFP:HIS3,BRR6:LEU2 haploid</i>                                                                                                              | This study                       |
| yDBK401         | <i>LAC O:PAB1GFP:HIS3,brr6-1:LEU2 haploid</i>                                                                                                            | This study                       |
| yDBK523         | <i>LAC O:LEU:PAB1,PAB1/ POM34GFP:HIS,POM34/LACIGFP:HIS3/ BRR6, BRR6:HIS:LEU diploid</i>                                                                  | This study                       |
| yDBK524         | <i>LAC O:LEU:PAB1,PAB1/ POM34GFP:HIS,POM34/LACIGFP:HIS3/ brr6-1, brr6-1:HIS:LEU diploid</i>                                                              | This study                       |
| yDBK521         | <i>LAC O:PAB1:LEU, BRR6 haploid</i>                                                                                                                      | This study                       |
| yDBK522         | <i>LAC O:PAB1, brr6-1 haploid</i>                                                                                                                        | This study                       |
| yDBK535         | <i>LACO:LEU2:GAL1, GAL1/LACIGFP:HIS3/NUP60GFP:HIS3, NUP60/BRR6, brr6::HIS3, BRR6(TRP1) diploid</i>                                                       | This study                       |
| yDBK536         | <i>LAC O:LEU2GAL1, GAL1/LACIGFP:HIS3/NUP60GFP:HIS3, NUP60/brr6-1, brr6::HIS3, brr6-1(TRP1) diploid</i>                                                   | This study                       |
| yDBK550         | <i>LACO:LEU2:GAL1, BRR6, his-,ura-, haploid</i>                                                                                                          | This study                       |
| yDBK551         | <i>LACO:LEU2:GAL1, brr6-1, his-,ura-, haploid</i>                                                                                                        | This study                       |
| yDBK552         | <i>LACO:LEU2:GAL1, BRR6, his-, NUP2_pRS316(CEN/ARS, URA3), haploid</i>                                                                                   | This study                       |
| yDBK553         | <i>LACO:LEU2:GAL1, BRR6, his-, NUP2_LACI_pRS316(CEN/ARS, URA3), haploid</i>                                                                              | This study                       |
| yDBK554         | <i>LACO:LEU2:GAL1, brr6-1, his-, NUP2_pRS316( CEN/ARS, URA3), haploid</i>                                                                                | This study                       |
| yDBK555         | <i>LACO:LEU2:GAL1, brr6-1, his-, NUP2_LACI_pRS316(CEN/ARS, URA3), haploid</i>                                                                            | This study                       |
| yDBK556         | W303, pJL602 (CEN/ARS, LEU2)                                                                                                                             | This study                       |

|         |                                                                                |            |
|---------|--------------------------------------------------------------------------------|------------|
| yDBK557 | W303, pP <sub>GAL</sub> _NLS- <i>BRR6</i> N-FLAG (pDBK102, (CEN/ARS, LEU2))    | This study |
| yDBK558 | W303, pP <sub>GAL</sub> _NLS <i>brr6-1</i> N_FLAG (pDBK106, (CEN/ARS, LEU2))   | This study |
| yDBK559 | W303, pP <sub>GAL</sub> _NLS- <i>brr6ΔC4</i> N_FLAG (pDBK104, (CEN/ARS, LEU2)) | This study |

**Table S2 QPCR Primers---**

\*target positions indicated with respect to start of relevant ORF

| Primer name                             | Sequence                 | *Target                                          |
|-----------------------------------------|--------------------------|--------------------------------------------------|
| <i>PAB15'</i> ORFF                      | GCCGCCACTGGTTCAGAAAG     | +69 <i>PAB1</i> ORF                              |
| <i>PAB15'</i> ORFR                      | TGGCATCACGACAGACACGA     | +221 <i>PAB1</i> ORF                             |
| <i>PAB13'</i> ORFF                      | TTCCCAAGAAATGCCAACGA     | +1467 <i>PAB1</i> ORF                            |
| <i>PAB13'</i> ORFR                      | CCTCTTGAGGTGGCAAATCCA    | +1625 <i>PAB1</i> ORF                            |
| CRYPTO <i>PABF</i>                      | TAAGGCCGTCAACGGTATGC     | CNAG_04441 ORF                                   |
| CRYPTO <i>PABR</i>                      | ACCCTTCTCGTCCCTGGAAA     | CNAG_04441 ORF                                   |
| K104upstnc_F2 ( <i>GAL7</i> nc1,2,3F)   | GCCTTGCTGCAACATCCAAT     | 232nt upstream; antisense to <i>KAP104</i>       |
| K104upstnc_R2 ( <i>GAL7</i> nc1R)       | TGACATCTGACACATTTCCACTTT | 387nt upstream; sense to <i>KAP104</i>           |
| <i>GAL7</i> 3'UTRF3 ( <i>GAL7</i> nc2R) | CAATGCAGCTTGTAAAGTAAA    | nt224 of <i>GAL7</i> 3'UTR; sense to <i>GAL7</i> |
| <i>GAL7</i> 3'UTRF1 ( <i>GAL7</i> nc3R) | GTGGAATATTCATTCATATCATAT | nt8 of <i>GAL7</i> 3'UTR; sense to <i>GAL7</i>   |
| <i>FUR4</i> mid ORFF                    | CACTTGGCAAATTCGAGCTA     |                                                  |
| <i>FUR4</i> mid ORFR                    | TGGCCATGACGACTCTGTTA     |                                                  |
| <i>GAL1-FUR4</i> intF                   | GGGGCAGTTGACGTCTTATC     |                                                  |
| <i>GAL1-FUR4</i> intR                   | TCCTCGCGCTTGTCTACTAAA    |                                                  |
| YAR047CF                                | GCCAATAAAGCGTTTCCTG      |                                                  |
| YAR047CR                                | TGAATCCACGGAGACATACG     |                                                  |
| YBR019CF                                | TGGTTACAGGTGGTGTGGA      |                                                  |
| YBR019CR                                | CAGCCTTTAAACCAGCAAAGTGA  |                                                  |
| YCR088WF                                | CGATTGGAATGAGCCTGAAT     |                                                  |
| YCR088WR                                | TGGCTTTTGAACAAGACGTG     |                                                  |
| YCR032WF                                | TCTGATCCTCGCTCACAAAA     |                                                  |
| YCR032WR                                | TGGCCTTCCTTAATTTCCAA     |                                                  |
| YDL129WF                                | AAGTGCAAGTCCCGAGAGT      |                                                  |
| YDL129WR                                | GGGAAGCAGGAAGAGGAAAGT    |                                                  |
| YEL065WF                                | CTGCCGCTAGCTTGTATTCC     |                                                  |
| YEL065WR                                | CTTCAAACCACCCGCTAAG      |                                                  |
| YEL071WF                                | GCCTCTGTTCGGTATTTTGA     |                                                  |
| YEL071WR                                | CAAACCACCTGCATTTGTTG     |                                                  |
| YFR016CF                                | AGCGCAAACCTCGCAAAAAT     |                                                  |
| YFR016CR                                | GGCCTTAACAGGTTTCATCCA    |                                                  |
| YGL089CF                                | TATTTTAGCGGCCGTTTCTG     |                                                  |
| YGL089CR                                | CTCTCTTTTCGCCAAAGTGG     |                                                  |
| YHL034CF                                | TGCTCACGAATGTACCGAAG     |                                                  |
| YHL034CR                                | GCATTTGGCCTGGAGTTCTA     |                                                  |
| YIR026CF                                | GATTTGACAACCCAGCCTA      |                                                  |
| YIR026CR                                | GCCAATTTGGTTCTGCACTT     |                                                  |
| YJL052WF                                | CTTACCGGTGCTGCTAAGG      |                                                  |
| YJL052WR                                | AACGGCATCTTCGGTGTAAC     |                                                  |
| YKL120WF                                | TAAGGACAGGTGCTGGTTCC     |                                                  |
| YKL120WR                                | ATCCCATGGGTTTCATAACGA    |                                                  |
| YLR286CF                                | TGGGATACTTTTCGGTGAAGG    |                                                  |
| YLR286CR                                | CAACAGAAGCATCCGGGTAT     |                                                  |
| YMR142CF                                | AATGCTAGAGCTGCCAGAGC     |                                                  |
| YMR142CR                                | ACCAATGGTTCTGGCGTAAG     |                                                  |
| YNL217WF                                | GAAAAGACGAGCCGCTACAC     |                                                  |
| YNL217WR                                | GAAAAGACGAGCCGCTACAC     |                                                  |
| YOL077CF                                | TGAACGAAATCGCTGAGTTG     |                                                  |
| YOL077CR                                | AAACGACAATACCGGACGAG     |                                                  |
| YPR069CF                                | AGACGGCTGGTTCAGAGAAA     |                                                  |
| YPR069CR                                | GATGGGAATTCAAGGCAAGA     |                                                  |

**Table S3: Microsoft Excel file of significant *brr6-1* expression changes following galactose-induction.**

**Table S4: Microsoft Excel file of significant *brr6-1* expression changes in glucose media.**

**Table S5: Microsoft Excel file of gene regions enriched in NLS-BRR6N fragment ChIPseq.**

#### SUPPLEMENTAL REFERENCES

- Chan YA, Aristizabal MJ, Lu PYT, Luo Z, Hamza A, Kobor MS, Stirling PC, Hieter P. 2014. Genome-wide profiling of yeast DNA:RNA hybrid prone sites with DRIP-chip. in *PLoS Genet*, p. e1004288.
- de Bruyn Kops A, Guthrie C. 2001. An essential nuclear envelope integral membrane protein, Brr6p, required for nuclear transport. in *EMBO J*, pp. 4183-4193.
- Huh W-K, Falvo JV, Gerke LC, Carroll AS, Howson RW, Weissman JS, O'Shea EK. 2003. Global analysis of protein localization in budding yeast. in *Nat Cell Biol*, pp. 686-691. Nature Publishing Group.

**Table S3 Significant sense expression changes in *brr6-1* versus wild type (galactose)**

|           | sense      | sense        | sense      | sense      | sense      | sense      |
|-----------|------------|--------------|------------|------------|------------|------------|
|           | baseMean   | log2FoldChar | lfcSE      | stat       | pvalue     | padj       |
| YAL001C   | 7099.55407 | 0.64624866   | 0.16628674 | 3.88635102 | 0.00010176 | 0.00121161 |
| YAL025C   | 2837.87783 | 0.66919297   | 0.16570212 | 4.03853003 | 5.38E-05   | 0.00068452 |
| YAL038W   | 129032.932 | -1.8870342   | 0.20232097 | -9.3269335 | 1.09E-20   | 1.58E-18   |
| YAL044C   | 5817.67738 | -1.1420511   | 0.16297109 | -7.0076914 | 2.42E-12   | 1.23E-10   |
| YAL053W   | 1326.36863 | -0.6341519   | 0.17401207 | -3.6442985 | 0.00026812 | 0.00268386 |
| YAL060W   | 20392.1341 | -1.3233609   | 0.19233931 | -6.8803453 | 5.97E-12   | 2.91E-10   |
| YAL061W   | 366.337345 | -1.1746902   | 0.24689998 | -4.7577573 | 1.96E-06   | 3.61E-05   |
| YAL062W   | 1570.94243 | -1.7681574   | 0.20027525 | -8.8286366 | 1.06E-18   | 1.22E-16   |
| YAR047C   | 128.954887 | 2.00944385   | 0.3465129  | 5.79904483 | 6.67E-09   | 2.12E-07   |
| YBL003C   | 8081.35117 | -0.6084514   | 0.17241295 | -3.5290353 | 0.00041708 | 0.00384064 |
| YBL016W   | 1555.87138 | -0.7800037   | 0.17202296 | -4.5342999 | 5.78E-06   | 9.28E-05   |
| YBL026W   | 1003.475   | 0.62507376   | 0.18550852 | 3.36951515 | 0.00075301 | 0.00618642 |
| YBL027W   | 10676.7084 | -0.6386461   | 0.19073744 | -3.3482996 | 0.00081309 | 0.0066088  |
| YBL032W   | 2594.27695 | -0.6339784   | 0.19398799 | -3.2681324 | 0.0010826  | 0.00829085 |
| YBL043W   | 695.974244 | 1.16046834   | 0.20233471 | 5.73538937 | 9.73E-09   | 2.97E-07   |
| YBL049W   | 320.445704 | -1.3188992   | 0.23251923 | -5.6722156 | 1.41E-08   | 4.07E-07   |
| YBL054W   | 205.374901 | 0.90625712   | 0.2713342  | 3.34000334 | 0.00083777 | 0.0067733  |
| YBL064C   | 1728.24355 | -1.6309543   | 0.19702707 | -8.2778184 | 1.25E-16   | 1.03E-14   |
| YBL072C   | 7564.16016 | -0.586409    | 0.1861817  | -3.14966   | 0.00163461 | 0.01155981 |
| YBL078C   | 439.961792 | -0.8418955   | 0.2084176  | -4.0394644 | 5.36E-05   | 0.00068348 |
| YBL098W   | 2749.45946 | 0.68127938   | 0.15668131 | 4.34818545 | 1.37E-05   | 0.00020164 |
| YBL113C   | 444.402441 | 1.03066802   | 0.23140276 | 4.45400052 | 8.43E-06   | 0.00013008 |
| YBR005W   | 996.820974 | -0.9607037   | 0.17678656 | -5.4342572 | 5.50E-08   | 1.42E-06   |
| YBR010W   | 10931.1966 | -0.7469584   | 0.17780887 | -4.2009063 | 2.66E-05   | 0.00036418 |
| YBR015C   | 2922.65177 | -0.8112519   | 0.16680177 | -4.8635688 | 1.15E-06   | 2.27E-05   |
| YBR018C   | 29706.2235 | -0.774811    | 0.16220954 | -4.7766055 | 1.78E-06   | 3.35E-05   |
| YBR019C   | 147945.006 | -0.6675494   | 0.15651729 | -4.26502   | 2.00E-05   | 0.00028011 |
| YBR020W   | 238938.763 | -0.7843655   | 0.17786919 | -4.4097887 | 1.03E-05   | 0.00015848 |
| YBR021W   | 4607.37085 | 1.83852838   | 0.1629613  | 11.281994  | 1.61E-29   | 4.27E-27   |
| YBR026C   | 2600.55113 | -0.6935198   | 0.17873611 | -3.8801325 | 0.0001044  | 0.00123337 |
| YBR035C   | 2311.12665 | -0.5982848   | 0.16916032 | -3.5367915 | 0.00040502 | 0.00374658 |
| YBR045C   | 883.464002 | 0.70444016   | 0.21759308 | 3.23741979 | 0.00120616 | 0.00906627 |
| YBR048W   | 4623.59039 | -0.7433783   | 0.197852   | -3.7572444 | 0.00017179 | 0.00185684 |
| YBR052C   | 2557.54448 | -0.7955552   | 0.16030121 | -4.9628773 | 6.95E-07   | 1.46E-05   |
| YBR053C   | 1807.00424 | -0.5807281   | 0.17737806 | -3.2739569 | 0.00106053 | 0.00817317 |
| YBR054W   | 5727.16294 | -1.4615669   | 0.23896995 | -6.1161117 | 9.59E-10   | 3.42E-08   |
| YBR066C   | 512.804826 | -1.3208994   | 0.25697306 | -5.1402253 | 2.74E-07   | 6.24E-06   |
| YBR068C   | 8199.29432 | -1.2948356   | 0.15220875 | -8.5069724 | 1.79E-17   | 1.70E-15   |
| YBR072W   | 2012.95072 | -3.3093347   | 0.21859697 | -15.138978 | 8.96E-52   | 7.80E-49   |
| YBR084W   | 17361.0664 | 0.62137597   | 0.15649177 | 3.97066237 | 7.17E-05   | 0.00087789 |
| YBR085C-A | 983.785452 | -0.6495794   | 0.18794658 | -3.4561915 | 0.00054787 | 0.0047606  |
| YBR088C   | 1163.01189 | -0.7536345   | 0.20827321 | -3.61849   | 0.00029633 | 0.00289489 |
| YBR089C-A | 1375.63595 | -1.3253447   | 0.19772523 | -6.702962  | 2.04E-11   | 9.09E-10   |
| YBR092C   | 884.260886 | -0.6988008   | 0.18497918 | -3.7777265 | 0.00015827 | 0.00174781 |
| YBR093C   | 524.346402 | -1.6957005   | 0.20391892 | -8.3155621 | 9.13E-17   | 7.84E-15   |
| YBR101C   | 3920.9772  | -0.8389582   | 0.17594191 | -4.7683819 | 1.86E-06   | 3.45E-05   |
| YBR106W   | 9340.48307 | -0.9114991   | 0.19955431 | -4.5676743 | 4.93E-06   | 8.08E-05   |
| YBR109W-A | 140.482887 | -1.0836303   | 0.28827208 | -3.7590538 | 0.00017056 | 0.00185003 |
| YBR114W   | 2199.69153 | -0.6031807   | 0.1656868  | -3.6404875 | 0.00027212 | 0.00271499 |
| YBR117C   | 232.033074 | -0.940654    | 0.26438611 | -3.55788   | 0.00037386 | 0.00350807 |
| YBR118W   | 38000.5952 | -0.6332676   | 0.17599471 | -3.5982194 | 0.0003204  | 0.00310028 |
| YBR126C   | 9352.65656 | -0.8823016   | 0.16677604 | -5.2903381 | 1.22E-07   | 2.99E-06   |
| YBR126W-A | 54.5399601 | -1.358148    | 0.3833715  | -3.5426421 | 0.00039614 | 0.0036756  |
| YBR137W   | 1383.46178 | -0.6857453   | 0.17248323 | -3.9757213 | 7.02E-05   | 0.00086586 |
| YBR139W   | 1330.09329 | -0.8205361   | 0.16979033 | -4.8326431 | 1.35E-06   | 2.62E-05   |
| YBR145W   | 1222.48551 | -0.8412477   | 0.17749722 | -4.7394977 | 2.14E-06   | 3.89E-05   |
| YBR148W   | 318.525841 | 0.85724479   | 0.23019818 | 3.72394255 | 0.00019614 | 0.00206501 |
| YBR149W   | 2774.81163 | -0.5890842   | 0.16335938 | -3.6060627 | 0.00031088 | 0.00302251 |
| YBR160W   | 1870.77271 | -0.6649077   | 0.19166877 | -3.4690455 | 0.00052231 | 0.00464275 |
| YBR161W   | 515.132878 | -0.8103756   | 0.21654792 | -3.742246  | 0.00018238 | 0.00195054 |
| YBR169C   | 4711.43221 | -0.6871774   | 0.18083176 | -3.8000925 | 0.00014464 | 0.0016264  |



|           |            |            |            |            |            |            |
|-----------|------------|------------|------------|------------|------------|------------|
| YBR177C   | 963.665458 | -0.7798437 | 0.18415675 | -4.2346734 | 2.29E-05   | 0.00031783 |
| YBR183W   | 965.544095 | -0.7129387 | 0.19556356 | -3.6455602 | 0.00026681 | 0.00268104 |
| YBR189W   | 10165.0618 | -0.6751168 | 0.19177015 | -3.5204475 | 0.00043082 | 0.00395523 |
| YBR191W   | 7629.71327 | -0.6905751 | 0.18303856 | -3.7728393 | 0.0001614  | 0.00177279 |
| YBR196C   | 57669.2583 | -0.9699286 | 0.15919685 | -6.0926367 | 1.11E-09   | 3.94E-08   |
| YBR222C   | 1096.75262 | 0.83398221 | 0.19132411 | 4.3590021  | 1.31E-05   | 0.00019379 |
| YBR243C   | 924.872762 | -0.5873732 | 0.17851653 | -3.2903016 | 0.0010008  | 0.00779167 |
| YBR244W   | 711.330014 | -0.7770703 | 0.19825102 | -3.9196279 | 8.87E-05   | 0.00107055 |
| YBR269C   | 527.759052 | -0.7161172 | 0.20320961 | -3.5240321 | 0.00042503 | 0.00390799 |
| YBR287W   | 463.562453 | -0.9471254 | 0.21396438 | -4.4265563 | 9.57E-06   | 0.0001474  |
| YBR291C   | 1077.5242  | -1.4630422 | 0.26354769 | -5.5513374 | 2.83E-08   | 7.61E-07   |
| YBR296C   | 1633.37067 | -3.5472086 | 0.21587841 | -16.431512 | 1.14E-60   | 1.73E-57   |
| YCL001W   | 1942.86715 | 0.66756557 | 0.16526444 | 4.03937814 | 5.36E-05   | 0.00068348 |
| YCL002C   | 1318.51889 | 0.69514659 | 0.17264313 | 4.02649445 | 5.66E-05   | 0.00071602 |
| YCL004W   | 278.513153 | 0.80420327 | 0.23669883 | 3.39758032 | 0.00067985 | 0.00565395 |
| YCL005W   | 448.727174 | 0.80780763 | 0.20488543 | 3.94272852 | 8.06E-05   | 0.00098022 |
| YCL005W-A | 1220.45138 | 0.77265661 | 0.19323582 | 3.99851656 | 6.37E-05   | 0.00079624 |
| YCL008C   | 117.377829 | 1.61980603 | 0.29998959 | 5.39954084 | 6.68E-08   | 1.71E-06   |
| YCL010C   | 5346.11554 | 1.2245303  | 0.15270723 | 8.01881044 | 1.07E-15   | 7.75E-14   |
| YCL011C   | 16998.3155 | 1.29844833 | 0.1472867  | 8.81578818 | 1.19E-18   | 1.34E-16   |
| YCL012C   | 81.5423574 | 1.25025964 | 0.33786898 | 3.70042737 | 0.00021524 | 0.00224288 |
| YCL014W   | 4015.47835 | 0.94964058 | 0.16942417 | 5.60510701 | 2.08E-08   | 5.72E-07   |
| YCL016C   | 1053.68417 | 0.78788175 | 0.18495846 | 4.25977687 | 2.05E-05   | 0.00028611 |
| YCL017C   | 6578.02296 | 1.26014013 | 0.15136682 | 8.32507491 | 8.43E-17   | 7.34E-15   |
| YCL018W   | 7085.12518 | 2.44513308 | 0.16671755 | 14.6663211 | 1.06E-48   | 8.07E-46   |
| YCL022C   | 32.2391572 | 1.77107128 | 0.41189608 | 4.2998012  | 1.71E-05   | 0.00024495 |
| YCL024W   | 3386.52597 | 1.14531589 | 0.1572866  | 7.28171303 | 3.30E-13   | 1.95E-11   |
| YCL025C   | 6427.11505 | 0.86263143 | 0.19015289 | 4.53651507 | 5.72E-06   | 9.25E-05   |
| YCL026C-A | 64.6007798 | 1.15740183 | 0.37281199 | 3.10451876 | 0.00190589 | 0.01293797 |
| YCL027W   | 185.816276 | 1.75444562 | 0.31826067 | 5.51260573 | 3.54E-08   | 9.45E-07   |
| YCL029C   | 697.784721 | 1.1662576  | 0.1900431  | 6.13680586 | 8.42E-10   | 3.09E-08   |
| YCL030C   | 19213.7185 | 0.65750446 | 0.15305762 | 4.29579695 | 1.74E-05   | 0.00024792 |
| YCL031C   | 4104.59893 | 0.80574872 | 0.18386024 | 4.3823978  | 1.17E-05   | 0.00017653 |
| YCL032W   | 1867.52902 | 1.12265478 | 0.16777934 | 6.6912576  | 2.21E-11   | 9.63E-10   |
| YCL033C   | 1460.07073 | 0.58894341 | 0.17315634 | 3.40122339 | 0.00067085 | 0.00559439 |
| YCL034W   | 7370.14262 | 0.85472636 | 0.16311407 | 5.24005284 | 1.61E-07   | 3.82E-06   |
| YCL036W   | 5919.96859 | 1.82794514 | 0.20159896 | 9.06723487 | 1.22E-19   | 1.58E-17   |
| YCL037C   | 341.565984 | 1.17200811 | 0.22323683 | 5.25006612 | 1.52E-07   | 3.66E-06   |
| YCL039W   | 593.568422 | 0.85420399 | 0.19685236 | 4.33931299 | 1.43E-05   | 0.00020844 |
| YCL040W   | 47046.3536 | -0.8449176 | 0.16526057 | -5.1126388 | 3.18E-07   | 7.09E-06   |
| YCL041C   | 42.5675861 | 1.3633314  | 0.3977794  | 3.42735543 | 0.00060949 | 0.00520372 |
| YCL044C   | 104.391589 | 1.39333478 | 0.32461695 | 4.2922428  | 1.77E-05   | 0.00025098 |
| YCL046W   | 30.5538589 | 1.5201238  | 0.41769619 | 3.63930492 | 0.00027337 | 0.00271859 |
| YCL047C   | 1659.35826 | 0.82100282 | 0.18776477 | 4.37250737 | 1.23E-05   | 0.00018397 |
| YCL048W   | 192.661648 | 1.026502   | 0.29356083 | 3.49672677 | 0.000471   | 0.00425369 |
| YCL048W-A | 50.6787591 | -1.3635598 | 0.38797711 | -3.5145367 | 0.00044052 | 0.00402009 |
| YCL049C   | 1578.94655 | 0.5884178  | 0.17940003 | 3.2799202  | 0.00103836 | 0.00802265 |
| YCL050C   | 365.839897 | 1.13525849 | 0.21470426 | 5.28754536 | 1.24E-07   | 3.02E-06   |
| YCL051W   | 429.731751 | 0.70061211 | 0.20550495 | 3.40922258 | 0.00065148 | 0.005493   |
| YCL052C   | 3406.71803 | 0.60872694 | 0.16005732 | 3.80318101 | 0.00014285 | 0.00161262 |
| YCL054W   | 19317.577  | 1.74733439 | 0.17284615 | 10.1091892 | 5.03E-24   | 9.02E-22   |
| YCL055W   | 2848.70932 | 0.79736128 | 0.17335483 | 4.59959076 | 4.23E-06   | 6.99E-05   |
| YCL056C   | 429.420476 | 1.20187183 | 0.21466379 | 5.59885692 | 2.16E-08   | 5.90E-07   |
| YCL057C-A | 246.025062 | 1.11156223 | 0.23938096 | 4.64348636 | 3.43E-06   | 5.80E-05   |
| YCL058C   | 107.357253 | 1.23110023 | 0.31629843 | 3.89221101 | 9.93E-05   | 0.00118885 |
| YCL058W-A | 619.625179 | 1.64447566 | 0.19257559 | 8.53937744 | 1.35E-17   | 1.33E-15   |
| YCL059C   | 7667.68277 | 1.08630947 | 0.20344412 | 5.33959634 | 9.32E-08   | 2.31E-06   |
| YCL061C   | 6242.98388 | 1.26274808 | 0.17881037 | 7.06193967 | 1.64E-12   | 8.55E-11   |
| YCL063W   | 1131.01144 | 1.14152069 | 0.18752924 | 6.08716122 | 1.15E-09   | 4.05E-08   |
| YCR003W   | 2797.0235  | 1.02272725 | 0.16701111 | 6.12370799 | 9.14E-10   | 3.31E-08   |
| YCR005C   | 11453.823  | -1.6666988 | 0.20638737 | -8.0755852 | 6.72E-16   | 4.93E-14   |
| YCR006C   | 698.856264 | 1.3953681  | 0.18889646 | 7.38694692 | 1.50E-13   | 9.16E-12   |
| YCR007C   | 394.328221 | 0.88436371 | 0.215674   | 4.10046501 | 4.12E-05   | 0.00054054 |
| YCR009C   | 6501.78062 | 0.6224181  | 0.15615059 | 3.98601186 | 6.72E-05   | 0.00083765 |

|           |            |            |            |            |            |            |
|-----------|------------|------------|------------|------------|------------|------------|
| YCR014C   | 4569.6186  | 1.37709953 | 0.1667307  | 8.25942396 | 1.46E-16   | 1.19E-14   |
| YCR015C   | 2272.91722 | 1.00126076 | 0.1592964  | 6.28552025 | 3.27E-10   | 1.21E-08   |
| YCR016W   | 2494.22433 | 1.16246744 | 0.19415202 | 5.98740847 | 2.13E-09   | 7.30E-08   |
| YCR017C   | 9862.23385 | 0.61487798 | 0.15273988 | 4.02565457 | 5.68E-05   | 0.00071709 |
| YCR019W   | 958.867918 | 0.8297494  | 0.17721843 | 4.68207169 | 2.84E-06   | 4.93E-05   |
| YCR020C   | 213.807068 | 1.6180373  | 0.25319121 | 6.39057456 | 1.65E-10   | 6.26E-09   |
| YCR020C-A | 908.954181 | 1.09255267 | 0.22220701 | 4.91682366 | 8.80E-07   | 1.79E-05   |
| YCR020W-B | 654.846683 | 0.98155903 | 0.20137162 | 4.87436616 | 1.09E-06   | 2.17E-05   |
| YCR023C   | 2595.42924 | 0.78203383 | 0.15823009 | 4.94238384 | 7.72E-07   | 1.59E-05   |
| YCR024C   | 302.378869 | 1.26333335 | 0.23423148 | 5.39352511 | 6.91E-08   | 1.74E-06   |
| YCR024C-A | 1074.40807 | 1.58573249 | 0.17903337 | 8.85718962 | 8.21E-19   | 9.62E-17   |
| YCR024C-B | 1782.77275 | 1.61613695 | 0.16380865 | 9.86600497 | 5.84E-23   | 9.38E-21   |
| YCR025C   | 102.088374 | 1.55981062 | 0.31379273 | 4.97083096 | 6.67E-07   | 1.41E-05   |
| YCR026C   | 7475.34643 | 0.76843956 | 0.15004044 | 5.12154963 | 3.03E-07   | 6.82E-06   |
| YCR028C   | 4582.11703 | 1.01156847 | 0.15344155 | 6.59253303 | 4.32E-11   | 1.75E-09   |
| YCR028C-A | 295.228288 | 1.0304309  | 0.83220505 | 0.22685311 | 4.54228245 | 5.56E-06   |
| YCR030C   | 380.379671 | 0.73336025 | 0.21183492 | 3.4619422  | 0.00053629 | 0.00471752 |
| YCR031C   | 1959.87121 | 1.19701554 | 0.16370037 | 7.31223489 | 2.63E-13   | 1.57E-11   |
| YCR032W   | 10745.4921 | 0.92200813 | 0.17468895 | 5.27799912 | 1.31E-07   | 3.16E-06   |
| YCR033W   | 3155.25338 | 0.91670267 | 0.16040751 | 5.71483616 | 1.10E-08   | 3.28E-07   |
| YCR034W   | 861.093251 | 0.83220505 | 0.17943479 | 4.63792472 | 3.52E-06   | 5.91E-05   |
| YCR035C   | 4917.28533 | 0.85458504 | 0.17780287 | 4.80636254 | 1.54E-06   | 2.93E-05   |
| YCR036W   | 2875.67366 | 0.77892128 | 0.1598411  | 4.87309771 | 1.10E-06   | 2.18E-05   |
| YCR037C   | 7775.55889 | 0.7322389  | 0.15547135 | 4.70979965 | 2.48E-06   | 4.39E-05   |
| YCR042C   | 12858.0748 | 1.41406406 | 0.16077851 | 8.79510596 | 1.43E-18   | 1.58E-16   |
| YCR043C   | 1037.72668 | 1.16744869 | 0.2088832  | 5.58900238 | 2.28E-08   | 6.22E-07   |
| YCR044C   | 1607.33432 | 0.58838202 | 0.16562211 | 3.55255715 | 0.00038151 | 0.00356697 |
| YCR045C   | 119.799393 | 1.30002434 | 0.32996532 | 3.93988171 | 8.15E-05   | 0.00098995 |
| YCR045W-A | 177.271391 | 0.91182775 | 0.26752909 | 3.40833127 | 0.00065361 | 0.00550337 |
| YCR047C   | 3588.0837  | 1.14363102 | 0.19450705 | 5.87963779 | 4.11E-09   | 1.33E-07   |
| YCR048W   | 1306.79445 | 0.6323577  | 0.18709258 | 3.3799186  | 0.00072507 | 0.00598922 |
| YCR049C   | 19.7665078 | 1.35093041 | 0.42193158 | 3.201776   | 0.00136583 | 0.01003146 |
| YCR050C   | 22.5308338 | 1.35242248 | 0.41962928 | 3.22289824 | 0.00126901 | 0.00943398 |
| YCR051W   | 4383.47779 | 0.69323283 | 0.19871807 | 3.4885244  | 0.00048569 | 0.00436695 |
| YCR052W   | 780.563028 | 0.61452687 | 0.19054264 | 3.22514103 | 0.00125911 | 0.00938692 |
| YCR053W   | 2296.33326 | 0.87585536 | 0.18156676 | 4.82387491 | 1.41E-06   | 2.71E-05   |
| YCR054C   | 1023.70182 | 1.49687017 | 0.18404    | 8.13339569 | 4.17E-16   | 3.18E-14   |
| YCR057C   | 14677.6425 | 1.27909381 | 0.1667431  | 7.67104504 | 1.71E-14   | 1.11E-12   |
| YCR060W   | 260.68784  | 0.74543309 | 0.23538863 | 3.16681852 | 0.00154116 | 0.01102692 |
| YCR061W   | 233.720872 | 1.6982696  | 0.25756596 | 6.59353264 | 4.29E-11   | 1.75E-09   |
| YCR063W   | 72.9950478 | 1.10447014 | 0.34826089 | 3.17138726 | 0.00151713 | 0.01088048 |
| YCR064C   | 105.168633 | 1.30803373 | 0.35464932 | 3.68824547 | 0.00022581 | 0.00233148 |
| YCR065W   | 352.044391 | 0.94464488 | 0.21687666 | 4.35567786 | 1.33E-05   | 0.0001958  |
| YCR066W   | 473.029722 | 0.97008136 | 0.20678802 | 4.69118733 | 2.72E-06   | 4.77E-05   |
| YCR067C   | 1076.61287 | 1.09901896 | 0.19727782 | 5.57092014 | 2.53E-08   | 6.84E-07   |
| YCR071C   | 375.43877  | 1.12520171 | 0.21586698 | 5.21247731 | 1.86E-07   | 4.35E-06   |
| YCR072C   | 2736.95662 | 0.93522004 | 0.225494   | 4.14742763 | 3.36E-05   | 0.00045147 |
| YCR073C   | 3394.89485 | 0.8057161  | 0.18333478 | 4.39478033 | 1.11E-05   | 0.00016815 |
| YCR076C   | 1649.67732 | 1.17324621 | 0.1666979  | 7.03815836 | 1.95E-12   | 1.01E-10   |
| YCR077C   | 2348.33163 | 0.75479386 | 0.16649101 | 4.53354132 | 5.80E-06   | 9.28E-05   |
| YCR079W   | 2174.65999 | 0.79927194 | 0.16289397 | 4.90670062 | 9.26E-07   | 1.87E-05   |
| YCR081C-A | 20.1169194 | 1.5126493  | 0.42170965 | 3.58694496 | 0.00033457 | 0.00320687 |
| YCR081W   | 1413.49912 | 0.76828175 | 0.17223696 | 4.46060911 | 8.17E-06   | 0.00012709 |
| YCR082W   | 1318.0754  | 0.97964938 | 0.17350044 | 5.64637975 | 1.64E-08   | 4.69E-07   |
| YCR084C   | 742.493906 | 0.83053465 | 0.19350554 | 4.29204592 | 1.77E-05   | 0.00025098 |
| YCR086W   | 123.248607 | 0.96961312 | 0.29465255 | 3.29069987 | 0.00099938 | 0.00779167 |
| YCR087C-A | 700.044964 | 1.08396753 | 0.21786126 | 4.97549471 | 6.51E-07   | 1.38E-05   |
| YCR088W   | 814.116915 | 1.18414318 | 0.18915352 | 6.26022274 | 3.84E-10   | 1.42E-08   |
| YCR089W   | 140.135764 | 1.74181242 | 0.33383815 | 5.21753555 | 1.81E-07   | 4.27E-06   |
| YCR090C   | 2256.52104 | 0.81239102 | 0.16294878 | 4.98556048 | 6.18E-07   | 1.32E-05   |
| YCR091W   | 224.677272 | 1.21398018 | 0.27703544 | 4.3820393  | 1.18E-05   | 0.00017653 |
| YCR092C   | 2736.86356 | 0.58668506 | 0.18077676 | 3.24535657 | 0.00117304 | 0.00888546 |
| YCR095C   | 2630.59406 | 0.91011595 | 0.17698835 | 5.14223647 | 2.71E-07   | 6.20E-06   |
| YCR098C   | 458.063699 | 1.22995383 | 0.21548752 | 5.70777284 | 1.14E-08   | 3.36E-07   |
| YCR099C   | 288.134681 | 1.7737206  | 0.24669443 | 7.18994989 | 6.48E-13   | 3.62E-11   |

|           |            |            |            |            |            |            |
|-----------|------------|------------|------------|------------|------------|------------|
| YCR100C   | 484.933794 | 1.93271119 | 0.23105323 | 8.36478754 | 6.02E-17   | 5.48E-15   |
| YCR101C   | 288.188737 | 1.68730609 | 0.2490242  | 6.77567117 | 1.24E-11   | 5.68E-10   |
| YCR105W   | 194.649962 | 1.36713728 | 0.27102326 | 5.04435408 | 4.55E-07   | 9.91E-06   |
| YCR106W   | 2994.17369 | 0.84884933 | 0.1821488  | 4.6601972  | 3.16E-06   | 5.43E-05   |
| YDL021W   | 786.496082 | -1.7239537 | 0.19339898 | -8.9139751 | 4.92E-19   | 5.89E-17   |
| YDL022W   | 468.497237 | -0.9610129 | 0.21836018 | -4.4010444 | 1.08E-05   | 0.00016459 |
| YDL045C   | 671.475456 | -0.66983   | 0.19262349 | -3.4774056 | 0.00050629 | 0.00453209 |
| YDL052C   | 610.232209 | -0.7371998 | 0.20326731 | -3.6267501 | 0.00028701 | 0.00282356 |
| YDL055C   | 54024.7955 | -0.6980365 | 0.16690446 | -4.1822516 | 2.89E-05   | 0.00039275 |
| YDL066W   | 10323.8428 | -1.3801552 | 0.16186065 | -8.5268115 | 1.50E-17   | 1.46E-15   |
| YDL079C   | 3328.4041  | -0.7662848 | 0.16065523 | -4.7697467 | 1.84E-06   | 3.44E-05   |
| YDL095W   | 8432.13216 | -0.6293632 | 0.158156   | -3.9793823 | 6.91E-05   | 0.00085784 |
| YDL111C   | 1089.73648 | -0.6152228 | 0.19466011 | -3.1604973 | 0.001575   | 0.01117719 |
| YDL124W   | 1379.57355 | -1.7316708 | 0.18916362 | -9.1543542 | 5.47E-20   | 7.41E-18   |
| YDL125C   | 1523.77781 | -0.8342553 | 0.17332721 | -4.8131812 | 1.49E-06   | 2.85E-05   |
| YDL131W   | 569.280333 | -0.7928716 | 0.23288121 | -3.4046181 | 0.00066257 | 0.00556337 |
| YDL133C-A | 4749.17561 | -0.7316209 | 0.17015953 | -4.2996174 | 1.71E-05   | 0.00024495 |
| YDL140C   | 4795.45365 | -0.8290513 | 0.15158333 | -5.4692776 | 4.52E-08   | 1.18E-06   |
| YDL148C   | 11437.7765 | 0.91791276 | 0.17585306 | 5.21977136 | 1.79E-07   | 4.23E-06   |
| YDL153C   | 8683.5674  | 0.97848555 | 0.1691283  | 5.78546313 | 7.23E-09   | 2.25E-07   |
| YDL154W   | 1045.87357 | 0.79011076 | 0.18170849 | 4.34823243 | 1.37E-05   | 0.00020164 |
| YDL168W   | 5948.89938 | -0.7957387 | 0.17570533 | -4.528825  | 5.93E-06   | 9.39E-05   |
| YDL195W   | 1826.42736 | -0.8881126 | 0.18409252 | -4.824273  | 1.41E-06   | 2.71E-05   |
| YDL235C   | 981.752358 | -0.822493  | 0.19743853 | -4.1658181 | 3.10E-05   | 0.00042027 |
| YDL239C   | 2002.54383 | 0.62636392 | 0.20130682 | 3.11148886 | 0.00186146 | 0.01273241 |
| YDR001C   | 4440.12774 | -1.1057969 | 0.17060167 | -6.4817472 | 9.07E-11   | 3.48E-09   |
| YDR003W   | 800.089245 | -0.7987678 | 0.18315828 | -4.3610794 | 1.29E-05   | 0.00019243 |
| YDR009W   | 7020.97785 | -0.9621421 | 0.16360837 | -5.8807633 | 4.08E-09   | 1.33E-07   |
| YDR019C   | 5775.20083 | -1.1606685 | 0.15571053 | -7.4540146 | 9.05E-14   | 5.63E-12   |
| YDR032C   | 3373.48384 | -1.0293241 | 0.20069717 | -5.1287427 | 2.92E-07   | 6.59E-06   |
| YDR034C   | 3213.27941 | -0.5988078 | 0.18147252 | -3.2997161 | 0.00096783 | 0.00759314 |
| YDR040C   | 1144.45946 | -0.8918626 | 0.21648057 | -4.1198273 | 3.79E-05   | 0.00050466 |
| YDR043C   | 110.717629 | -1.0985582 | 0.30221859 | -3.6349789 | 0.000278   | 0.00276011 |
| YDR050C   | 35160.8663 | -1.5002692 | 0.1480331  | -10.134687 | 3.88E-24   | 7.28E-22   |
| YDR054C   | 704.326714 | -1.1151502 | 0.19687797 | -5.6641696 | 1.48E-08   | 4.25E-07   |
| YDR060W   | 22424.1127 | 0.64896472 | 0.15586648 | 4.16359391 | 3.13E-05   | 0.00042345 |
| YDR063W   | 358.432735 | -1.0515673 | 0.22177795 | -4.7415321 | 2.12E-06   | 3.86E-05   |
| YDR067C   | 311.776529 | -0.803597  | 0.23184903 | -3.4660358 | 0.00052819 | 0.00467749 |
| YDR073W   | 319.880133 | -0.800596  | 0.22567097 | -3.5476252 | 0.00038872 | 0.00362331 |
| YDR074W   | 1925.74047 | -1.1500223 | 0.17140175 | -6.7095131 | 1.95E-11   | 8.75E-10   |
| YDR085C   | 1144.91373 | -0.9428772 | 0.17611007 | -5.3539087 | 8.61E-08   | 2.15E-06   |
| YDR089W   | 2039.60969 | -0.6824764 | 0.17893858 | -3.8140258 | 0.00013672 | 0.00155205 |
| YDR092W   | 333.142864 | -0.7748485 | 0.23032545 | -3.3641462 | 0.00076781 | 0.00629108 |
| YDR110W   | 3612.82831 | 0.58385385 | 0.17744407 | 3.29035417 | 0.00100061 | 0.00779167 |
| YDR111C   | 1439.78552 | 0.70523815 | 0.17524832 | 4.02422199 | 5.72E-05   | 0.00071998 |
| YDR132C   | 448.592121 | -0.8438174 | 0.23394679 | -3.6068775 | 0.0003099  | 0.00301785 |
| YDR135C   | 21371.4952 | -0.9863394 | 0.19231816 | -5.1286858 | 2.92E-07   | 6.59E-06   |
| YDR151C   | 751.512542 | -0.698341  | 0.18846382 | -3.7054379 | 0.00021103 | 0.00220654 |
| YDR178W   | 821.642677 | 1.22226918 | 0.24182082 | 5.05444154 | 4.32E-07   | 9.47E-06   |
| YDR216W   | 2145.90802 | -0.7709786 | 0.17035856 | -4.5256231 | 6.02E-06   | 9.51E-05   |
| YDR228C   | 592.119371 | 0.68784086 | 0.19453035 | 3.53590519 | 0.00040638 | 0.0037478  |
| YDR260C   | 411.760746 | -0.7788066 | 0.21887729 | -3.5581884 | 0.00037342 | 0.00350807 |
| YDR262W   | 1048.9145  | -1.5111647 | 0.20803341 | -7.2640482 | 3.76E-13   | 2.20E-11   |
| YDR264C   | 16049.9315 | -0.6103496 | 0.16129405 | -3.78408   | 0.00015428 | 0.00171308 |
| YDR270W   | 8243.67191 | -0.6686879 | 0.17390484 | -3.8451366 | 0.00012049 | 0.00138843 |
| YDR273W   | 509.587599 | 0.72071685 | 0.21981185 | 3.27878982 | 0.00104253 | 0.00804466 |
| YDR287W   | 1406.28079 | -0.6385439 | 0.1752054  | -3.6445447 | 0.00026787 | 0.00268386 |
| YDR297W   | 597.578328 | -0.83779   | 0.21687613 | -3.8629886 | 0.00011201 | 0.00131056 |
| YDR319C   | 940.223963 | -0.6256413 | 0.18076234 | -3.4611261 | 0.00053792 | 0.00471822 |
| YDR340W   | 2896.58006 | -2.0365265 | 0.18405936 | -11.064509 | 1.86E-28   | 4.55E-26   |
| YDR342C   | 580.463063 | -1.9721152 | 0.22582527 | -8.7329252 | 2.48E-18   | 2.69E-16   |
| YDR353W   | 7056.2552  | -1.1129296 | 0.16348116 | -6.8076933 | 9.92E-12   | 4.65E-10   |
| YDR356W   | 4122.56606 | 0.61275107 | 0.1753038  | 3.4953668  | 0.00047341 | 0.0042691  |
| YDR358W   | 1327.00839 | -0.6397482 | 0.18585517 | -3.4421867 | 0.00057703 | 0.00498948 |

|           |            |            |            |            |            |            |                                                                                                                                                             |
|-----------|------------|------------|------------|------------|------------|------------|-------------------------------------------------------------------------------------------------------------------------------------------------------------|
| YDR365C   | 10709.6678 | 0.74746467 | 0.1713392  | 4.36248486 | 1.29E-05   | 0.00019166 |                                                                                                                                                             |
| YDR366C   | 1374.54914 | 0.72192434 | 0.18909413 | 3.81780409 | 0.00013464 | 0.00153133 |                                                                                                                                                             |
| YDR368W   | 3078.47612 | -1.2233985 | 0.17043838 | -7.1779521 | 7.08E-13   | 3.92E-11   |                                                                                                                                                             |
| YDR380W   | 1983.69021 | -1.317517  | 0.17788382 | -7.4066155 | 1.30E-13   | 7.98E-12   |                                                                                                                                                             |
| YDR384C   | 563.930025 | -0.8896115 | 0.26831976 | -3.3154901 | 0.00091483 | 0.00728039 |                                                                                                                                                             |
| YDR399W   | 4032.06916 | -0.8413724 | 0.21773716 | -3.8641652 | 0.00011147 | 0.00130929 |                                                                                                                                                             |
| YDR406W   | 4496.40867 | -1.2882039 | 0.19107015 | -6.7420468 | 1.56E-11   | 7.10E-10   |                                                                                                                                                             |
| YDR410C   | 490.043674 | -0.6501393 | 0.20652699 | -3.1479627 | 0.00164413 | 0.01158682 |                                                                                                                                                             |
| YDR412W   | 2179.18255 | 0.60605518 | 0.18171651 | 3.33516857 | 0.00085248 | 0.00686486 |                                                                                                                                                             |
| YDR420W   | 726.698821 | -0.6475543 | 0.18684394 | -3.4657498 | 0.00052876 | 0.00467749 |                                                                                                                                                             |
| YDR423C   | 1800.09598 | -1.1524403 | 0.17239338 | -6.6849451 | 2.31E-11   | 9.99E-10   |                                                                                                                                                             |
| YDR456W   | 1756.10165 | -0.5821193 | 0.18533416 | -3.1409176 | 0.00168419 | 0.01180098 |                                                                                                                                                             |
| YDR483W   | 1408.78067 | -0.8035127 | 0.1869074  | -4.2989881 | 1.72E-05   | 0.00024495 |                                                                                                                                                             |
| YDR502C   | 674.268094 | -1.3866973 | 0.20773677 | -6.6752616 | 2.47E-11   | 1.05E-09   |                                                                                                                                                             |
| YDR516C   | 10452.3099 | -1.3300004 | 0.18645517 | -7.1330841 | 9.81E-13   | 5.29E-11   |                                                                                                                                                             |
| YDR533C   | 569.953429 | -1.8908268 | 0.23796354 | -7.9458676 | 1.93E-15   | 1.38E-13   |                                                                                                                                                             |
| YDR539W   | 1646.43279 | -0.6211172 | 0.17959566 | -3.45842   | 0.00054335 | 0.0047522  |                                                                                                                                                             |
| YEL002C   | 1918.64665 | -0.6889944 | 0.16764318 | -4.1098862 | 3.96E-05   | 0.00052232 |                                                                                                                                                             |
| YEL006W   | 952.985679 | -0.6592381 | 0.17870405 | -3.6889936 | 0.00022514 | 0.00233017 |                                                                                                                                                             |
| YEL009C   | 3181.89871 | -0.6661907 | 0.17161946 | -3.88179   | 0.00010369 | 0.00122972 |                                                                                                                                                             |
| YEL011W   | 5986.31339 | -1.1637441 | 0.17503481 | -6.6486441 | 2.96E-11   | 1.24E-09   |                                                                                                                                                             |
| YEL024W   | 1836.93666 | 0.65317115 | 0.20486184 | 3.1883495  | 0.00143087 | 0.01038406 |                                                                                                                                                             |
| YEL042W   | 2160.75568 | -0.6734338 | 0.18446922 | -3.6506566 | 0.00026157 | 0.00265314 |                                                                                                                                                             |
| YEL047C   | 1335.16985 | -2.1422524 | 0.20712224 | -10.342937 | 4.51E-25   | 9.15E-23   |                                                                                                                                                             |
| YEL054C   | 6632.60388 | -0.7326118 | 0.19586073 | -3.7404734 | 0.00018367 | 0.0019609  |                                                                                                                                                             |
| YEL060C   | 1762.23644 | -1.2560858 | 0.18352185 | -6.8443393 | 7.68E-12   | 3.69E-10   |                                                                                                                                                             |
| YEL065W   | 14529.9934 | -0.8909689 | 0.22955279 | -3.8813244 | 0.00010389 | 0.00122972 |                                                                                                                                                             |
| YEL066W   | 1055.16475 | -0.836258  | 0.22198793 | -3.7671327 | 0.00016513 | 0.00180404 |                                                                                                                                                             |
| YEL071W   | 15715.8701 | -1.8476714 | 0.22160979 | -8.3374989 | 7.59E-17   | 6.70E-15   |                                                                                                                                                             |
| YER002W   | 2603.83864 | 0.78917253 | 0.16342867 | 4.82885002 | 1.37E-06   | 2.66E-05   |                                                                                                                                                             |
| YER019C-A | 2769.8462  | -0.6215522 | 0.16787563 | -3.7024565 | 0.00021352 | 0.00222882 |                                                                                                                                                             |
| YER024W   | 3728.96383 | -1.1222113 | 0.18327996 | -6.122935  | 9.19E-10   | 3.31E-08   |                                                                                                                                                             |
| YER035W   | 352.445875 | -0.986093  | 0.21911503 | -4.5003438 | 6.78E-06   | 0.00010659 |                                                                                                                                                             |
| YER037W   | 697.391176 | -2.2160322 | 0.19552591 | -11.333701 | 8.93E-30   | 2.48E-27   |                                                                                                                                                             |
| YER044C   | 607.388958 | -0.739137  | 0.20380969 | -3.6266038 | 0.00028717 | 0.00282356 |                                                                                                                                                             |
| YER053C   | 1083.70695 | -0.6778875 | 0.21564868 | -3.1434811 | 0.00166951 | 0.01172505 |                                                                                                                                                             |
| YER054C   | 598.976292 | -0.8075568 | 0.20322702 | -3.9736683 | 7.08E-05   | 0.00087159 |                                                                                                                                                             |
| YER056C   | 7558.19572 | -0.7784934 | 0.15633317 | -4.9797071 | 6.37E-07   | 1.35E-05   |                                                                                                                                                             |
| YER060W-A | 235.726252 | 0.90212799 | 0.2786522  | 3.23746949 | 0.00120595 | 0.00906627 |                                                                                                                                                             |
| YER062C   | 1608.43734 | -1.4144432 | 0.16500934 | -8.5718978 | 1.02E-17   | 1.05E-15   |                                                                                                                                                             |
| YER063W   | 1652.57689 | -0.633968  | 0.20058552 | -3.1605869 | 0.00157452 | 0.01117719 |                                                                                                                                                             |
| YER064C   | 845.053619 | -0.8459125 | 0.18832641 | -4.4917357 | 7.06E-06   | 0.00011071 |                                                                                                                                                             |
| YER070W   | 3361.90506 | -1.0347087 | 0.17513264 | -5.908143  | 3.46E-09   | 1.15E-07   |                                                                                                                                                             |
| YER072W   | 517.815194 | -1.5187593 | 0.20107092 | -7.5533516 | 4.24E-14   | 2.72E-12   |                                                                                                                                                             |
| YER074W   | 7523.89748 | -0.6461183 | 0.16773275 | -3.85207   | 0.00011712 | 0.00135224 |                                                                                                                                                             |
| YER081W   | 1510.85619 | -0.5950772 | 0.17443088 | -3.4115356 | 0.00064598 | 0.00546172 |                                                                                                                                                             |
| YER089C   | 1773.00325 | -0.7240303 | 0.16771188 | -4.3171082 | 1.58E-05   | 0.00022929 |                                                                                                                                                             |
| YER091C   | 4599.111   | -1.3558055 | 0.17366399 | -7.807062  | 5.85E-15   | 4.05E-13   |                                                                                                                                                             |
| YER100W   | 1133.08875 | -0.5845814 | 0.17743312 | -3.2946576 | 0.00098542 | 0.00770141 |                                                                                                                                                             |
| YER124C   | 4836.47774 | -1.055939  | 0.17391043 | -6.0717403 | 1.27E-09   | 4.43E-08   |                                                                                                                                                             |
| YER138W-A | 301.183206 | -1.2015778 | 0.24982624 | -4.809654  | 1.51E-06   | 2.89E-05   |                                                                                                                                                             |
| YER145C   | 13944.3221 | -0.6300922 | 0.20129859 | -3.1301373 | 0.00174725 | 0.01214506 |                                                                                                                                                             |
| YER163C   | 1392.6247  | -0.7656701 | 0.1709186  | -4.4797357 | 7.47E-06   | 0.00011682 |                                                                                                                                                             |
| YER165W   | 6290.86184 | -0.5555092 | 0.17293327 | -3.2122749 | 0.00131688 | 0.00975422 | Expression change for YER165W(PAB1) was below significance cutoff used for RNAseq analysis (+/-0.57). Data was included for comparison with RT QPCR results |
| YER177W   | 25571.7759 | -1.0718159 | 0.16051435 | -6.6773837 | 2.43E-11   | 1.04E-09   |                                                                                                                                                             |
| YFL010C   | 3386.91725 | -0.9488203 | 0.20278718 | -4.6788972 | 2.88E-06   | 4.99E-05   |                                                                                                                                                             |
| YFL014W   | 1848.91549 | -2.3296834 | 0.17080644 | -13.639318 | 2.34E-42   | 1.30E-39   |                                                                                                                                                             |
| YFL023W   | 3983.79559 | 0.99883593 | 0.18538821 | 5.38780729 | 7.13E-08   | 1.79E-06   |                                                                                                                                                             |
| YFL031W   | 31920.0891 | -0.8775986 | 0.16466001 | -5.3297615 | 9.83E-08   | 2.43E-06   |                                                                                                                                                             |
| YFL038C   | 13970.1899 | -0.7420336 | 0.1901908  | -3.9015221 | 9.56E-05   | 0.00114934 |                                                                                                                                                             |
| YFL045C   | 17247.5517 | -0.6405355 | 0.15348145 | -4.173374  | 3.00E-05   | 0.00040747 |                                                                                                                                                             |
| YFL053W   | 359.677171 | -1.3011629 | 0.2319268  | -5.6102311 | 2.02E-08   | 5.62E-07   |                                                                                                                                                             |
| YFL064C   | 44.4401709 | 1.49418405 | 0.38903584 | 3.84073623 | 0.00012267 | 0.00141089 |                                                                                                                                                             |

|           |            |            |            |            |            |            |
|-----------|------------|------------|------------|------------|------------|------------|
| YFR001W   | 2076.61841 | 0.76085001 | 0.20405396 | 3.72867072 | 0.00019249 | 0.00203368 |
| YFR011C   | 931.435213 | 0.82261527 | 0.19114679 | 4.3035789  | 1.68E-05   | 0.00024277 |
| YFR015C   | 1950.74126 | -1.4293834 | 0.17050011 | -8.3834747 | 5.14E-17   | 4.82E-15   |
| YFR047C   | 1497.96508 | -0.6224042 | 0.17390836 | -3.5789204 | 0.00034502 | 0.00329658 |
| YFR052C-A | 1569.46531 | -1.474642  | 0.17788483 | -8.2898693 | 1.13E-16   | 9.60E-15   |
| YFR053C   | 27323.842  | -1.5939426 | 0.17372303 | -9.1751945 | 4.51E-20   | 6.25E-18   |
| YGL009C   | 13749.4713 | -1.8714354 | 0.15555539 | -12.030669 | 2.45E-33   | 8.79E-31   |
| YGL012W   | 11675.4557 | -0.8225401 | 0.15235841 | -5.3987183 | 6.71E-08   | 1.71E-06   |
| YGL029W   | 1281.56451 | 0.73943355 | 0.20163932 | 3.66710992 | 0.00024531 | 0.00250485 |
| YGL030W   | 4869.3019  | -0.9018075 | 0.15704619 | -5.7423073 | 9.34E-09   | 2.86E-07   |
| YGL037C   | 5603.06899 | -1.6028388 | 0.172895   | -9.2705904 | 1.85E-20   | 2.62E-18   |
| YGL039W   | 1419.64357 | -0.7595778 | 0.24333995 | -3.1214675 | 0.00179952 | 0.01246577 |
| YGL078C   | 4640.38349 | 0.60909868 | 0.18849633 | 3.2313556  | 0.00123205 | 0.00923807 |
| YGL089C   | 313.710997 | 0.96358749 | 0.29140116 | 3.30673872 | 0.00094389 | 0.00744366 |
| YGL091C   | 2526.71472 | -0.6118805 | 0.15955342 | -3.8349568 | 0.00012559 | 0.00143905 |
| YGL121C   | 614.495635 | -1.1704112 | 0.23411025 | -4.999402  | 5.75E-07   | 1.23E-05   |
| YGL138C   | 29.7801667 | 1.30046339 | 0.41165356 | 3.15912095 | 0.00158246 | 0.01121705 |
| YGL156W   | 3501.8366  | -0.8236586 | 0.17193956 | -4.7903964 | 1.66E-06   | 3.16E-05   |
| YGL170C   | 79.5115404 | 1.11493848 | 0.33513282 | 3.32685553 | 0.00087832 | 0.00704504 |
| YGL205W   | 807.030401 | -0.7341893 | 0.21242063 | -3.4562994 | 0.00054765 | 0.0047606  |
| YGL234W   | 8887.62302 | -0.7119291 | 0.17998997 | -3.9553823 | 7.64E-05   | 0.00093349 |
| YGL246C   | 3238.87712 | 0.78317951 | 0.16610836 | 4.71487104 | 2.42E-06   | 4.31E-05   |
| YGL247W   | 2149.50968 | 2.98531957 | 0.18943764 | 15.7588508 | 5.97E-56   | 6.07E-53   |
| YGL248W   | 9923.4308  | 3.25447052 | 0.16882367 | 19.2773353 | 8.33E-83   | 2.54E-79   |
| YGL253W   | 74406.7746 | -0.6197412 | 0.18683052 | -3.3171305 | 0.00090947 | 0.00725411 |
| YGL255W   | 1900.81411 | -2.0456361 | 0.22568166 | -9.0642547 | 1.25E-19   | 1.59E-17   |
| YGL263W   | 124.702233 | 2.34054582 | 0.32998193 | 7.09295157 | 1.31E-12   | 6.90E-11   |
| YGR008C   | 1580.66772 | -1.1834836 | 0.18105129 | -6.5367309 | 6.29E-11   | 2.44E-09   |
| YGR014W   | 1081.50838 | -1.2599242 | 0.18281792 | -6.8916886 | 5.51E-12   | 2.71E-10   |
| YGR019W   | 869.23596  | -0.7245215 | 0.19863655 | -3.6474733 | 0.00026483 | 0.00267287 |
| YGR027C   | 8552.50402 | -0.6461291 | 0.1814657  | -3.5606128 | 0.00036999 | 0.00348603 |
| YGR032W   | 18821.4466 | -1.3439343 | 0.17386122 | -7.7299253 | 1.08E-14   | 7.21E-13   |
| YGR043C   | 582.417312 | -1.1845793 | 0.20004786 | -5.9214795 | 3.19E-09   | 1.07E-07   |
| YGR044C   | 2346.56826 | -0.9623026 | 0.17249899 | -5.5785986 | 2.42E-08   | 6.57E-07   |
| YGR055W   | 5250.76743 | -1.1843453 | 0.17416089 | -6.8002942 | 1.04E-11   | 4.86E-10   |
| YGR059W   | 141.816806 | 1.07710064 | 0.31506432 | 3.41866911 | 0.00062928 | 0.00534276 |
| YGR060W   | 2390.01441 | -0.6870799 | 0.18538441 | -3.7062443 | 0.00021036 | 0.00220331 |
| YGR086C   | 3637.7061  | -0.6884102 | 0.15569682 | -4.4214788 | 9.80E-06   | 0.00015052 |
| YGR088W   | 340.85372  | -1.0482369 | 0.23520272 | -4.456738  | 8.32E-06   | 0.00012895 |
| YGR153W   | 457.904482 | -0.9890835 | 0.2174243  | -4.5490935 | 5.39E-06   | 8.81E-05   |
| YGR157W   | 12416.7655 | -0.8080025 | 0.16572509 | -4.8755592 | 1.09E-06   | 2.17E-05   |
| YGR161W-C | 190.73547  | -0.9639638 | 0.25718795 | -3.7480908 | 0.00017819 | 0.00191322 |
| YGR175C   | 19545.8887 | -0.6853071 | 0.17117628 | -4.003517  | 6.24E-05   | 0.00078119 |
| YGR192C   | 36731.7541 | -0.7198812 | 0.14847687 | -4.8484403 | 1.24E-06   | 2.44E-05   |
| YGR196C   | 1849.15205 | 0.61456612 | 0.18471059 | 3.32718405 | 0.00087728 | 0.00704504 |
| YGR204W   | 5279.44888 | -1.189573  | 0.17095476 | -6.9584082 | 3.44E-12   | 1.72E-10   |
| YGR205W   | 1215.22082 | -0.8217071 | 0.17175325 | -4.7842304 | 1.72E-06   | 3.25E-05   |
| YGR209C   | 2963.27766 | -1.0971439 | 0.21236047 | -5.1664223 | 2.39E-07   | 5.47E-06   |
| YGR233C   | 2672.2502  | -1.106239  | 0.16745202 | -6.6063041 | 3.94E-11   | 1.61E-09   |
| YGR234W   | 66329.6766 | -0.7199656 | 0.17184292 | -4.1896727 | 2.79E-05   | 0.00038183 |
| YGR240C   | 23071.7751 | -0.9129454 | 0.15993365 | -5.7082762 | 1.14E-08   | 3.36E-07   |
| YGR248W   | 191.348682 | -0.9621048 | 0.27790107 | -3.4620405 | 0.0005361  | 0.00471752 |
| YGR254W   | 42015.5953 | -2.9693606 | 0.18339224 | -16.191309 | 5.81E-59   | 7.08E-56   |
| YGR256W   | 554.076794 | -1.2320249 | 0.22431801 | -5.4923138 | 3.97E-08   | 1.04E-06   |
| YGR267C   | 2532.64538 | -0.6195762 | 0.18954994 | -3.2686701 | 0.00108054 | 0.00828552 |
| YGR287C   | 711.26111  | -0.6887189 | 0.19627164 | -3.5090086 | 0.00044978 | 0.00408015 |
| YGR292W   | 427.474073 | -1.2281239 | 0.21509163 | -5.7097709 | 1.13E-08   | 3.36E-07   |
| YHL015W   | 21682.2493 | -1.0492115 | 0.22748552 | -4.612212  | 3.98E-06   | 6.60E-05   |
| YHL021C   | 522.703546 | -0.8772877 | 0.20484633 | -4.2826625 | 1.85E-05   | 0.00026059 |
| YHL024W   | 1043.28426 | -1.1164407 | 0.20701406 | -5.393067  | 6.93E-08   | 1.74E-06   |
| YHL034C   | 6765.13378 | -0.9698911 | 0.16762886 | -5.7859433 | 7.21E-09   | 2.25E-07   |
| YHL035C   | 6141.78875 | -1.1035282 | 0.16696954 | -6.6091589 | 3.87E-11   | 1.59E-09   |
| YHL036W   | 575.020612 | -1.1177022 | 0.25444495 | -4.3927072 | 1.12E-05   | 0.00016934 |

|           |            |            |            |            |            |            |
|-----------|------------|------------|------------|------------|------------|------------|
| YHL040C   | 2815.92345 | -2.0815195 | 0.17072138 | -12.192495 | 3.41E-34   | 1.30E-31   |
| YHL047C   | 5114.35776 | -1.2810804 | 0.39515756 | -3.2419483 | 0.00118716 | 0.00897607 |
| YHL048W   | 210.089815 | 1.3007338  | 0.27281667 | 4.76779442 | 1.86E-06   | 3.45E-05   |
| YHL050C   | 413.551395 | 2.07808471 | 0.242608   | 8.56560672 | 1.08E-17   | 1.09E-15   |
| YHR007C   | 9077.19975 | -0.6006325 | 0.17719363 | -3.389696  | 0.0006997  | 0.00580324 |
| YHR029C   | 1385.81374 | -0.8599605 | 0.17507694 | -4.9119008 | 9.02E-07   | 1.83E-05   |
| YHR041C   | 1006.96824 | -0.7001252 | 0.18797065 | -3.7246515 | 0.00019559 | 0.00206278 |
| YHR043C   | 4054.04924 | -0.607101  | 0.16969351 | -3.5776326 | 0.00034672 | 0.00330251 |
| YHR048W   | 375.552877 | -1.5991373 | 0.24353472 | -6.5663625 | 5.16E-11   | 2.03E-09   |
| YHR049W   | 2937.888   | -0.9904328 | 0.17591925 | -5.6300419 | 1.80E-08   | 5.11E-07   |
| YHR062C   | 725.44881  | -0.7100044 | 0.23109464 | -3.0723533 | 0.00212378 | 0.01408768 |
| YHR068W   | 1054.21314 | -0.7748002 | 0.20110245 | -3.8527636 | 0.00011679 | 0.00135098 |
| YHR071W   | 1570.20836 | -0.9045578 | 0.19127858 | -4.7290073 | 2.26E-06   | 4.05E-05   |
| YHR081W   | 940.089709 | 0.86433006 | 0.19076453 | 4.53087409 | 5.87E-06   | 9.35E-05   |
| YHR087W   | 100.492782 | -1.0817284 | 0.31647099 | -3.4180967 | 0.00063061 | 0.00534657 |
| YHR092C   | 6647.01922 | -0.8610919 | 0.15055148 | -5.7195846 | 1.07E-08   | 3.22E-07   |
| YHR096C   | 374.362637 | -0.772968  | 0.22621204 | -3.4170067 | 0.00063314 | 0.00536056 |
| YHR098C   | 2283.54965 | -0.6072209 | 0.17481523 | -3.473501  | 0.00051372 | 0.00457838 |
| YHR107C   | 3048.6537  | -0.6849788 | 0.18790145 | -3.6454155 | 0.00026696 | 0.00268104 |
| YHR110W   | 1113.87713 | -0.7031808 | 0.18506221 | -3.7996997 | 0.00014487 | 0.0016264  |
| YHR112C   | 1821.16463 | -0.8640891 | 0.18677754 | -4.6263011 | 3.72E-06   | 6.20E-05   |
| YHR136C   | 80.9113684 | -1.6829761 | 0.33979063 | -4.9529796 | 7.31E-07   | 1.52E-05   |
| YHR137W   | 1339.31587 | -1.0827575 | 0.17697243 | -6.118227  | 9.46E-10   | 3.39E-08   |
| YHR142W   | 1293.96497 | -0.8290915 | 0.17843041 | -4.6465816 | 3.37E-06   | 5.75E-05   |
| YHR162W   | 6537.16493 | -0.9477123 | 0.19098033 | -4.9623554 | 6.96E-07   | 1.46E-05   |
| YHR163W   | 2058.02912 | -0.7676074 | 0.169463   | -4.5296463 | 5.91E-06   | 9.38E-05   |
| YHR174W   | 116301.067 | -1.2845165 | 0.14711552 | -8.7313458 | 2.52E-18   | 2.69E-16   |
| YHR179W   | 10855.3894 | -2.205841  | 0.16472043 | -13.391423 | 6.79E-41   | 3.45E-38   |
| YHR199C   | 1970.09329 | -1.1554391 | 0.16138699 | -7.1594317 | 8.10E-13   | 4.41E-11   |
| YHR203C   | 12444.5551 | -0.7551795 | 0.20854568 | -3.6211708 | 0.00029327 | 0.00287426 |
| YHR208W   | 1440.76947 | -1.8706649 | 0.18853714 | -9.9219969 | 3.34E-23   | 5.66E-21   |
| YHR215W   | 139.297027 | -1.2796563 | 0.30261659 | -4.228639  | 2.35E-05   | 0.00032573 |
| YIL008W   | 1057.45141 | 0.66325138 | 0.18741003 | 3.53903879 | 0.00040159 | 0.00372048 |
| YIL009C-A | 369.851206 | -0.7147088 | 0.23177467 | -3.0836364 | 0.00204487 | 0.01368337 |
| YIL010W   | 384.827095 | -1.099395  | 0.21616806 | -5.0858346 | 3.66E-07   | 8.08E-06   |
| YIL037C   | 81.6527493 | 1.15849463 | 0.34927391 | 3.31686563 | 0.00091033 | 0.00725411 |
| YIL045W   | 303.249001 | -0.7687075 | 0.23197056 | -3.3138148 | 0.00092032 | 0.00729557 |
| YIL051C   | 2316.80757 | -0.8511407 | 0.1971722  | -4.3167382 | 1.58E-05   | 0.00022929 |
| YIL053W   | 497.862914 | -1.458174  | 0.21112795 | -6.9065891 | 4.96E-12   | 2.46E-10   |
| YIL057C   | 733.719108 | -1.3272378 | 0.28014251 | -4.7377236 | 2.16E-06   | 3.91E-05   |
| YIL062C   | 1790.23504 | -0.9237979 | 0.19526911 | -4.7308963 | 2.24E-06   | 4.02E-05   |
| YIL074C   | 2986.51651 | -0.7144988 | 0.16618126 | -4.2995146 | 1.71E-05   | 0.00024495 |
| YIL088C   | 4394.88152 | -0.6070313 | 0.16427391 | -3.6952385 | 0.00021968 | 0.00228138 |
| YIL089W   | 154.106667 | 0.90953227 | 0.28397362 | 3.20287596 | 0.00136063 | 0.01000528 |
| YIL094C   | 11380.403  | -0.9754251 | 0.22756377 | -4.2863812 | 1.82E-05   | 0.00025686 |
| YIL111W   | 531.631513 | -0.7694966 | 0.20259308 | -3.7982371 | 0.00014573 | 0.00163302 |
| YIL112W   | 8365.59009 | 0.59573665 | 0.16311438 | 3.65226324 | 0.00025994 | 0.00264184 |
| YIL116W   | 2669.70054 | -0.6528979 | 0.18558589 | -3.5180365 | 0.00043475 | 0.00397339 |
| YIL117C   | 593.671108 | -0.9239312 | 0.2249987  | -4.1063845 | 4.02E-05   | 0.00052801 |
| YIL121W   | 2526.14322 | -0.6108622 | 0.15959307 | -3.8276234 | 0.00012939 | 0.00147981 |
| YIL124W   | 1172.02766 | -0.886037  | 0.17925971 | -4.9427559 | 7.70E-07   | 1.59E-05   |
| YIL145C   | 3017.08577 | -0.5833312 | 0.1858325  | -3.139016  | 0.00169516 | 0.01182347 |
| YIL160C   | 222.423817 | -0.9776757 | 0.25100306 | -3.8950748 | 9.82E-05   | 0.00117802 |
| YIL162W   | 27512.2329 | -0.9330707 | 0.18562903 | -5.0265343 | 4.99E-07   | 1.08E-05   |
| YIL166C   | 419.709391 | 1.35966975 | 0.23198038 | 5.86114104 | 4.60E-09   | 1.48E-07   |
| YIR016W   | 1816.98752 | -0.6843382 | 0.18210971 | -3.7578347 | 0.00017139 | 0.00185576 |
| YIR018W   | 746.491727 | -0.9368602 | 0.19355775 | -4.84021   | 1.30E-06   | 2.53E-05   |
| YIR025W   | 461.034147 | 0.65840514 | 0.21421291 | 3.07360158 | 0.00211492 | 0.01405947 |
| YIR035C   | 2310.52775 | -0.6443032 | 0.16637026 | -3.8727064 | 0.00010763 | 0.00126667 |
| YIR042C   | 293.859324 | 2.25392959 | 0.29038904 | 7.76175857 | 8.38E-15   | 5.74E-13   |
| YJL012C   | 10857.6805 | -1.6302633 | 0.15343838 | -10.624873 | 2.28E-26   | 5.35E-24   |
| YJL016W   | 919.025328 | -0.6693615 | 0.17687746 | -3.7843234 | 0.00015413 | 0.00171308 |
| YJL026W   | 5059.27352 | -0.7806503 | 0.15486979 | -5.0406882 | 4.64E-07   | 1.01E-05   |

|           |            |            |            |            |            |            |
|-----------|------------|------------|------------|------------|------------|------------|
| YJL033W   | 6002.93096 | 0.72316822 | 0.1874938  | 3.8570247  | 0.00011478 | 0.00133525 |
| YJL035C   | 656.893877 | 1.14923854 | 0.18988393 | 6.05232128 | 1.43E-09   | 4.95E-08   |
| YJL050W   | 15411.3473 | 0.64606018 | 0.15884529 | 4.06722903 | 4.76E-05   | 0.00061445 |
| YJL052W   | 25611.3834 | -5.4921286 | 0.18912506 | -29.039666 | 2.08E-185  | 1.27E-181  |
| YJL071W   | 1982.17897 | 0.61077823 | 0.16059442 | 3.80323451 | 0.00014282 | 0.00161262 |
| YJL074C   | 5121.07269 | 0.60423275 | 0.16003819 | 3.77555356 | 0.00015965 | 0.00175993 |
| YJL101C   | 5852.75553 | -1.3323646 | 0.20243881 | -6.5815671 | 4.66E-11   | 1.85E-09   |
| YJL107C   | 552.983847 | -0.6060339 | 0.19489042 | -3.1096133 | 0.00187332 | 0.01275953 |
| YJL112W   | 4299.0452  | 0.64299706 | 0.16822976 | 3.82213624 | 0.0001323  | 0.00151031 |
| YJL117W   | 2585.4062  | -0.7458411 | 0.1826842  | -4.0826797 | 4.45E-05   | 0.00057989 |
| YJL133C-A | 164.363902 | -1.9152645 | 0.3417068  | -5.6049937 | 2.08E-08   | 5.72E-07   |
| YJL141C   | 573.469793 | -0.653854  | 0.19557588 | -3.343224  | 0.00082811 | 0.00671298 |
| YJL151C   | 669.138499 | -1.1097954 | 0.21467695 | -5.1696068 | 2.35E-07   | 5.40E-06   |
| YJL171C   | 3437.82583 | -1.2741924 | 0.1659991  | -7.6758992 | 1.64E-14   | 1.08E-12   |
| YJL172W   | 733.91143  | -0.9352239 | 0.1988413  | -4.7033684 | 2.56E-06   | 4.52E-05   |
| YJL189W   | 8251.21329 | 0.77547623 | 0.16344319 | 4.74462256 | 2.09E-06   | 3.82E-05   |
| YJL196C   | 3964.34131 | -0.662565  | 0.17387618 | -3.8105564 | 0.00013865 | 0.00157107 |
| YJL212C   | 597.397609 | -1.14138   | 0.19500666 | -5.8530307 | 4.83E-09   | 1.55E-07   |
| YJL213W   | 732.938975 | -0.8393202 | 0.23848495 | -3.5193843 | 0.00043255 | 0.00395919 |
| YJL217W   | 2772.57788 | -1.6217479 | 0.22508895 | -7.2049201 | 5.81E-13   | 3.28E-11   |
| YJL218W   | 222.93449  | -1.0899897 | 0.29333502 | -3.7158527 | 0.00020252 | 0.00212489 |
| YJR004C   | 315.087802 | 0.97272728 | 0.25713098 | 3.78300303 | 0.00015495 | 0.00171738 |
| YJR008W   | 1182.62638 | -0.6983121 | 0.17536401 | -3.9820721 | 6.83E-05   | 0.00084992 |
| YJR009C   | 25769.7496 | -1.7119615 | 0.17857628 | -9.5867239 | 9.09E-22   | 1.39E-19   |
| YJR017C   | 521.43807  | -0.928967  | 0.21992337 | -4.2240489 | 2.40E-05   | 0.00033169 |
| YJR048W   | 3725.65585 | 0.60349201 | 0.19375893 | 3.11465393 | 0.00184161 | 0.01265665 |
| YJR059W   | 1004.71565 | -0.5932051 | 0.17878456 | -3.3179884 | 0.00090668 | 0.00724395 |
| YJR073C   | 1414.04275 | -1.1240705 | 0.17440993 | -6.4449911 | 1.16E-10   | 4.40E-09   |
| YJR074W   | 1257.70511 | -0.7780123 | 0.19090765 | -4.0753335 | 4.59E-05   | 0.00059596 |
| YJR078W   | 1300.43821 | -1.5427973 | 0.1712547  | -9.008788  | 2.08E-19   | 2.59E-17   |
| YJR096W   | 987.838139 | -0.9399658 | 0.17586098 | -5.3449366 | 9.04E-08   | 2.25E-06   |
| YJR099W   | 546.066903 | -0.6797874 | 0.19668023 | -3.4563078 | 0.00054763 | 0.0047606  |
| YJR103W   | 5183.62435 | -1.0483902 | 0.15928235 | -6.5819609 | 4.64E-11   | 1.85E-09   |
| YJR104C   | 11897.7669 | -0.938572  | 0.19110871 | -4.9111945 | 9.05E-07   | 1.83E-05   |
| YJR117W   | 257.210965 | 0.83553082 | 0.23936608 | 3.49059821 | 0.00048194 | 0.0043396  |
| YJR119C   | 697.988151 | -0.6104159 | 0.19011509 | -3.2107704 | 0.0013238  | 0.00978165 |
| YJR135W-A | 404.86906  | 0.72954918 | 0.22310996 | 3.26990863 | 0.00107582 | 0.00826116 |
| YJR145C   | 15270.1439 | -0.6562913 | 0.19652826 | -3.3394244 | 0.00083952 | 0.00677844 |
| YJR148W   | 8618.1015  | -1.0383326 | 0.22708802 | -4.5723793 | 4.82E-06   | 7.92E-05   |
| YKL005C   | 1738.98276 | 0.58094522 | 0.17375648 | 3.34344497 | 0.00082745 | 0.00671298 |
| YKL007W   | 2196.69222 | -0.8056818 | 0.1831167  | -4.399827  | 1.08E-05   | 0.00016511 |
| YKL008C   | 680.233932 | -1.1427979 | 0.20263319 | -5.6397368 | 1.70E-08   | 4.85E-07   |
| YKL015W   | 4311.5523  | -0.6269145 | 0.1534676  | -4.0849955 | 4.41E-05   | 0.00057537 |
| YKL018C-A | 430.922887 | 0.6839444  | 0.22148593 | 3.08798127 | 0.00201521 | 0.01354436 |
| YKL019W   | 952.908536 | -0.6200068 | 0.18580598 | -3.3368504 | 0.00084734 | 0.00683248 |
| YKL035W   | 5426.36096 | -0.6328399 | 0.15556308 | -4.0680594 | 4.74E-05   | 0.00061356 |
| YKL039W   | 2966.39349 | -0.7503113 | 0.15870627 | -4.7276726 | 2.27E-06   | 4.06E-05   |
| YKL060C   | 71566.4605 | -1.4621157 | 0.15086953 | -9.6912594 | 3.28E-22   | 5.13E-20   |
| YKL069W   | 1497.13636 | -0.6755312 | 0.17113787 | -3.9472925 | 7.90E-05   | 0.00096366 |
| YKL071W   | 300.643134 | -1.2787796 | 0.31742056 | -4.0286604 | 5.61E-05   | 0.00071093 |
| YKL078W   | 1475.47841 | 0.66504764 | 0.20789262 | 3.19899593 | 0.00137907 | 0.01009222 |
| YKL082C   | 3703.03117 | 0.91929852 | 0.17636779 | 5.21239446 | 1.86E-07   | 4.35E-06   |
| YKL091C   | 1145.42118 | -0.6003303 | 0.17323543 | -3.4654014 | 0.00052944 | 0.00467749 |
| YKL103C   | 2814.18524 | -1.7823776 | 0.21774762 | -8.1855203 | 2.71E-16   | 2.09E-14   |
| YKL120W   | 2907.65933 | -2.6966534 | 0.19458202 | -13.858698 | 1.13E-43   | 7.63E-41   |
| YKL125W   | 4894.4254  | 0.848738   | 0.17377094 | 4.88423434 | 1.04E-06   | 2.08E-05   |
| YKL128C   | 2329.63449 | -0.646447  | 0.18535189 | -3.4876742 | 0.00048724 | 0.00437441 |
| YKL141W   | 572.090036 | 0.78489606 | 0.23308543 | 3.367418   | 0.00075876 | 0.00622527 |
| YKL142W   | 2648.02202 | -1.0740115 | 0.18366197 | -5.8477623 | 4.98E-09   | 1.59E-07   |
| YKL143W   | 5211.0285  | 0.73422705 | 0.20585724 | 3.56668077 | 0.00036153 | 0.00341689 |
| YKL151C   | 2381.54197 | -0.8249096 | 0.16960341 | -4.8637559 | 1.15E-06   | 2.27E-05   |
| YKL152C   | 46471.9101 | -1.9236295 | 0.15117074 | -12.72488  | 4.30E-37   | 1.87E-34   |
| YKL155C   | 3905.20065 | 0.65591068 | 0.15943051 | 4.11408497 | 3.89E-05   | 0.00051514 |
| YKL161C   | 1076.61779 | -1.1145016 | 0.19456281 | -5.7282357 | 1.01E-08   | 3.08E-07   |

|         |            |            |            |            |            |            |
|---------|------------|------------|------------|------------|------------|------------|
| YKL172W | 4307.34432 | 0.73438918 | 0.18488576 | 3.972124   | 7.12E-05   | 0.0008755  |
| YKL182W | 48802.0972 | -0.6267916 | 0.15756995 | -3.9778627 | 6.95E-05   | 0.00086159 |
| YKL192C | 398.060776 | 0.72971031 | 0.21282722 | 3.42865129 | 0.00060659 | 0.00519777 |
| YKL207W | 2907.88284 | -0.6011904 | 0.16574173 | -3.6272722 | 0.00028643 | 0.00282356 |
| YKR011C | 428.53113  | -0.7417296 | 0.20731424 | -3.5778032 | 0.00034649 | 0.00330251 |
| YKR012C | 57.19011   | 1.30997437 | 0.36495742 | 3.58938961 | 0.00033145 | 0.00318195 |
| YKR015C | 362.845118 | 1.65913653 | 0.27510111 | 6.03100626 | 1.63E-09   | 5.61E-08   |
| YKR024C | 5868.47884 | 0.6231106  | 0.18809133 | 3.31280876 | 0.00092364 | 0.00730287 |
| YKR039W | 1601.33095 | -1.3552617 | 0.18107777 | -7.4844182 | 7.19E-14   | 4.52E-12   |
| YKR042W | 638.525328 | 0.83331831 | 0.1895455  | 4.39640263 | 1.10E-05   | 0.00016731 |
| YKR049C | 280.218859 | -0.7639447 | 0.2336323  | -3.269859  | 0.00107601 | 0.00826116 |
| YKR052C | 1666.85697 | -1.1285089 | 0.17866254 | -6.3164268 | 2.68E-10   | 1.01E-08   |
| YKR059W | 5079.19235 | -0.7210337 | 0.17497931 | -4.1206794 | 3.78E-05   | 0.0005039  |
| YKR071C | 1198.68927 | -1.0031972 | 0.18232238 | -5.5023263 | 3.75E-08   | 9.98E-07   |
| YKR074W | 1405.49123 | -0.7394436 | 0.18623367 | -3.970515  | 7.17E-05   | 0.00087789 |
| YKR076W | 2235.8413  | -2.4707629 | 0.24291956 | -10.171116 | 2.67E-24   | 5.25E-22   |
| YKR093W | 3544.13136 | -0.8234388 | 0.1620547  | -5.0812394 | 3.75E-07   | 8.25E-06   |
| YKR106W | 174.522891 | 0.94671126 | 0.26337341 | 3.59455895 | 0.00032494 | 0.00313425 |
| YLL005C | 94.5603338 | 1.15954121 | 0.34889243 | 3.32349201 | 0.00088898 | 0.00712118 |
| YLL008W | 14714.4435 | 0.81373891 | 0.17031574 | 4.77782553 | 1.77E-06   | 3.34E-05   |
| YLL026W | 9529.86911 | -0.746147  | 0.15919871 | -4.686891  | 2.77E-06   | 4.85E-05   |
| YLL049W | 300.600968 | -0.931683  | 0.2463654  | -3.7817119 | 0.00015575 | 0.00172318 |
| YLL050C | 5815.72627 | -0.6433717 | 0.1762648  | -3.6500292 | 0.00026221 | 0.00265521 |
| YLL051C | 1852.14334 | -1.105946  | 0.18773205 | -5.891088  | 3.84E-09   | 1.26E-07   |
| YLL053C | 400.523001 | -0.9855433 | 0.25970594 | -3.7948431 | 0.00014774 | 0.00164946 |
| YLL060C | 1939.51302 | -1.5681356 | 0.22865825 | -6.8579884 | 6.98E-12   | 3.38E-10   |
| YLL062C | 652.54713  | -0.7552294 | 0.19572804 | -3.8585653 | 0.00011405 | 0.0013294  |
| YLR015W | 2554.8057  | 0.6814565  | 0.17647046 | 3.86158958 | 0.00011265 | 0.00131556 |
| YLR027C | 11260.3168 | -0.6633218 | 0.2001395  | -3.3142975 | 0.00091874 | 0.00729247 |
| YLR034C | 1694.55882 | -0.6772657 | 0.16657841 | -4.0657474 | 4.79E-05   | 0.00061706 |
| YLR040C | 165.465021 | 0.89081528 | 0.27685476 | 3.21762671 | 0.00129256 | 0.00958569 |
| YLR044C | 23589.8788 | -0.912028  | 0.16065648 | -5.6768829 | 1.37E-08   | 3.98E-07   |
| YLR046C | 659.85644  | -0.6640868 | 0.19312139 | -3.4387013 | 0.00058451 | 0.00503986 |
| YLR047C | 1075.2538  | -0.6428753 | 0.18296772 | -3.5135997 | 0.00044208 | 0.00402827 |
| YLR056W | 13638.6426 | -1.1700656 | 0.19287781 | -6.0663567 | 1.31E-09   | 4.56E-08   |
| YLR058C | 1845.03174 | -1.1757405 | 0.16545491 | -7.1061081 | 1.19E-12   | 6.33E-11   |
| YLR068W | 1036.68973 | 0.81219119 | 0.19538935 | 4.15678323 | 3.23E-05   | 0.0004353  |
| YLR079W | 731.324183 | -0.8632577 | 0.19041713 | -4.5335086 | 5.80E-06   | 9.28E-05   |
| YLR081W | 171041.985 | -0.6737944 | 0.14518702 | -4.6408722 | 3.47E-06   | 5.86E-05   |
| YLR092W | 595.65403  | -1.2832736 | 0.2624393  | -4.8897922 | 1.01E-06   | 2.03E-05   |
| YLR093C | 2653.93638 | -0.5894759 | 0.1660919  | -3.5490947 | 0.00038656 | 0.00360866 |
| YLR099C | 679.986422 | -0.7270647 | 0.23356679 | -3.1128772 | 0.00185273 | 0.01270444 |
| YLR108C | 1011.19568 | -1.73998   | 0.22237467 | -7.824542  | 5.10E-15   | 3.61E-13   |
| YLR109W | 2621.44383 | -0.9965275 | 0.20929782 | -4.7612894 | 1.92E-06   | 3.55E-05   |
| YLR120C | 1642.41645 | -0.8396773 | 0.1797674  | -4.6709098 | 3.00E-06   | 5.18E-05   |
| YLR126C | 1340.63904 | -0.8757379 | 0.22414482 | -3.9070182 | 9.34E-05   | 0.00112574 |
| YLR130C | 2868.17784 | -0.6517075 | 0.17457981 | -3.7330062 | 0.00018921 | 0.00200943 |
| YLR136C | 929.145879 | -2.1883694 | 0.26230808 | -8.3427451 | 7.26E-17   | 6.51E-15   |
| YLR172C | 1037.9322  | -0.7360384 | 0.21019761 | -3.5016498 | 0.00046239 | 0.00418206 |
| YLR177W | 956.700048 | -0.8558198 | 0.18365449 | -4.6599445 | 3.16E-06   | 5.43E-05   |
| YLR178C | 762.035369 | -0.6902757 | 0.19410786 | -3.5561449 | 0.00037634 | 0.00352404 |
| YLR179C | 1642.90912 | -1.2452305 | 0.18528308 | -6.7206922 | 1.81E-11   | 8.17E-10   |
| YLR205C | 2739.86816 | -0.7976706 | 0.16443933 | -4.8508504 | 1.23E-06   | 2.42E-05   |
| YLR213C | 369.33526  | -0.9036829 | 0.24446309 | -3.6966025 | 0.0002185  | 0.00227304 |
| YLR214W | 8788.36521 | -0.9717059 | 0.19074562 | -5.0942502 | 3.50E-07   | 7.79E-06   |
| YLR251W | 513.240635 | -0.845052  | 0.23266676 | -3.632027  | 0.0002812  | 0.00278282 |
| YLR252W | 215.598542 | -0.9115524 | 0.26315414 | -3.4639485 | 0.00053231 | 0.00469602 |
| YLR255C | 67.9607043 | 1.3763207  | 0.35625673 | 3.86328332 | 0.00011187 | 0.00131056 |
| YLR256W | 6144.38733 | -1.7793235 | 0.16874743 | -10.5443   | 5.40E-26   | 1.18E-23   |
| YLR258W | 5318.43895 | -1.3982749 | 0.17023149 | -8.2139616 | 2.14E-16   | 1.67E-14   |
| YLR267W | 459.125381 | -1.6485122 | 0.22780302 | -7.2365689 | 4.60E-13   | 2.65E-11   |
| YLR270W | 2734.22612 | -0.8523516 | 0.18424182 | -4.6262655 | 3.72E-06   | 6.20E-05   |
| YLR284C | 923.197028 | -0.7630084 | 0.18571525 | -4.1084856 | 3.98E-05   | 0.00052436 |
| YLR295C | 626.771934 | 0.61317304 | 0.1891734  | 3.24132803 | 0.00118974 | 0.00897607 |



|           |            |            |            |            |            |            |
|-----------|------------|------------|------------|------------|------------|------------|
| YLR300W   | 8024.75797 | -1.4372597 | 0.17156794 | -8.3772043 | 5.42E-17   | 5.01E-15   |
| YLR303W   | 3061.37533 | -1.3816818 | 0.21030018 | -6.5700458 | 5.03E-11   | 1.99E-09   |
| YLR319C   | 3912.67543 | 0.58733809 | 0.16111686 | 3.64541658 | 0.00026696 | 0.00268104 |
| YLR327C   | 3117.05406 | -1.5151617 | 0.18370102 | -8.2479765 | 1.61E-16   | 1.29E-14   |
| YLR328W   | 1114.36954 | -0.7321523 | 0.19444277 | -3.7653871 | 0.00016629 | 0.00181222 |
| YLR336C   | 6365.99732 | 0.61875299 | 0.16046338 | 3.85603855 | 0.00011524 | 0.00133809 |
| YLR340W   | 19721.4052 | -0.5994318 | 0.17528836 | -3.4196898 | 0.00062693 | 0.00533018 |
| YLR342W   | 49666.8038 | -0.606468  | 0.17670064 | -3.4321775 | 0.00059876 | 0.00515539 |
| YLR346C   | 699.265114 | -2.129717  | 0.24915113 | -8.5478923 | 1.25E-17   | 1.25E-15   |
| YLR348C   | 2303.80836 | -1.3008435 | 0.18535793 | -7.0180082 | 2.25E-12   | 1.15E-10   |
| YLR351C   | 1395.90246 | -0.7557798 | 0.17674861 | -4.2760156 | 1.90E-05   | 0.00026725 |
| YLR354C   | 17151.7008 | -0.6323902 | 0.17429272 | -3.6283225 | 0.00028527 | 0.00281847 |
| YLR355C   | 25431.4784 | -1.1295883 | 0.22892379 | -4.9343419 | 8.04E-07   | 1.66E-05   |
| YLR414C   | 1752.6749  | -1.0681809 | 0.18683915 | -5.7171147 | 1.08E-08   | 3.25E-07   |
| YLR432W   | 2876.62326 | -0.9478055 | 0.17518744 | -5.4102366 | 6.29E-08   | 1.62E-06   |
| YLR448W   | 3810.23629 | -0.9989933 | 0.21061388 | -4.7432455 | 2.10E-06   | 3.84E-05   |
| YLR452C   | 1679.61422 | 0.64349397 | 0.18018399 | 3.57131592 | 0.00035519 | 0.00336219 |
| YLR460C   | 349.781383 | -1.0320612 | 0.23752633 | -4.3450391 | 1.39E-05   | 0.00020406 |
| YML051W   | 3402.16473 | -0.8592235 | 0.1829178  | -4.6973202 | 2.64E-06   | 4.64E-05   |
| YML065W   | 3873.10687 | 0.66141497 | 0.16455923 | 4.01931254 | 5.84E-05   | 0.00073212 |
| YML072C   | 8527.65005 | -0.730091  | 0.15762225 | -4.631903  | 3.62E-06   | 6.07E-05   |
| YML081C-A | 340.414031 | 0.90194287 | 0.22248575 | 4.05393537 | 5.04E-05   | 0.00064771 |
| YML085C   | 6465.88515 | -0.5982289 | 0.17462501 | -3.4257913 | 0.00061301 | 0.00522646 |
| YML093W   | 4643.85866 | 1.02729742 | 0.17467189 | 5.88129791 | 4.07E-09   | 1.33E-07   |
| YML100W   | 3286.6206  | -1.7838991 | 0.22047378 | -8.0912075 | 5.91E-16   | 4.39E-14   |
| YML106W   | 7874.37491 | -0.6481907 | 0.16479098 | -3.933411  | 8.37E-05   | 0.00101498 |
| YML107C   | 497.986957 | -0.6585015 | 0.21159538 | -3.1120789 | 0.00185775 | 0.01272453 |
| YML116W   | 2693.85161 | -1.2752775 | 0.39565371 | -3.2232164 | 0.0012676  | 0.00943398 |
| YML123C   | 2016.1757  | -3.6808278 | 0.20651286 | -17.823722 | 4.63E-71   | 9.40E-68   |
| YML128C   | 3762.29012 | -0.9644741 | 0.16789552 | -5.7444898 | 9.22E-09   | 2.84E-07   |
| YML131W   | 3603.87934 | -2.7907145 | 0.23736918 | -11.756852 | 6.51E-32   | 1.89E-29   |
| YMR010W   | 1070.27581 | -0.8155881 | 0.19349593 | -4.2150143 | 2.50E-05   | 0.00034369 |
| YMR011W   | 7366.64303 | -1.0534449 | 0.22469896 | -4.6882503 | 2.76E-06   | 4.83E-05   |
| YMR020W   | 1888.74651 | -0.6269729 | 0.16177802 | -3.8755136 | 0.0001064  | 0.00125457 |
| YMR038C   | 2911.26855 | -1.6313241 | 0.16099096 | -10.133017 | 3.94E-24   | 7.28E-22   |
| YMR041C   | 798.861301 | -0.9542577 | 0.18263381 | -5.2249779 | 1.74E-07   | 4.13E-06   |
| YMR058W   | 19178.9799 | -1.4404676 | 0.19976529 | -7.2108003 | 5.56E-13   | 3.17E-11   |
| YMR062C   | 5071.29921 | 0.61258714 | 0.17124778 | 3.57719747 | 0.0003473  | 0.00330285 |
| YMR079W   | 2216.70272 | -0.6888626 | 0.18142662 | -3.7969215 | 0.0001465  | 0.0016387  |
| YMR083W   | 14084.8897 | -1.0562009 | 0.18342797 | -5.7581235 | 8.51E-09   | 2.63E-07   |
| YMR095C   | 474.80987  | -1.5162298 | 0.26663708 | -5.6864926 | 1.30E-08   | 3.78E-07   |
| YMR096W   | 1134.53    | -1.1375208 | 0.20244323 | -5.6189617 | 1.92E-08   | 5.40E-07   |
| YMR099C   | 4904.41236 | -0.5880591 | 0.16350922 | -3.5964889 | 0.00032254 | 0.00311602 |
| YMR103C   | 992.314554 | -0.6893269 | 0.17725785 | -3.8888372 | 0.00010073 | 0.00120161 |
| YMR104C   | 4236.26841 | -0.6295207 | 0.15240799 | -4.1304968 | 3.62E-05   | 0.00048497 |
| YMR105C   | 13347.9176 | -1.5104178 | 0.19487827 | -7.7505706 | 9.15E-15   | 6.20E-13   |
| YMR107W   | 69.4253746 | -1.0906667 | 0.35026847 | -3.1138022 | 0.00184693 | 0.01267894 |
| YMR108W   | 10639.9276 | -0.8377497 | 0.16459821 | -5.0896646 | 3.59E-07   | 7.95E-06   |
| YMR112C   | 215.317601 | 0.7889238  | 0.24862981 | 3.17308614 | 0.00150828 | 0.01084252 |
| YMR120C   | 2893.31954 | -1.5256204 | 0.18519428 | -8.2379455 | 1.75E-16   | 1.39E-14   |
| YMR128W   | 6768.22435 | 0.59870523 | 0.18606651 | 3.21769472 | 0.00129225 | 0.00958569 |
| YMR170C   | 973.612683 | -0.6177085 | 0.18148598 | -3.4036156 | 0.000665   | 0.0055686  |
| YMR173W   | 266.393891 | -1.3007751 | 0.28787099 | -4.5186045 | 6.22E-06   | 9.81E-05   |
| YMR185W   | 2118.67742 | 0.71466276 | 0.17384515 | 4.11091582 | 3.94E-05   | 0.00052113 |
| YMR189W   | 4639.24787 | -1.3400038 | 0.20267851 | -6.6114748 | 3.81E-11   | 1.58E-09   |
| YMR202W   | 4473.93797 | -0.8088856 | 0.17835962 | -4.5351387 | 5.76E-06   | 9.28E-05   |
| YMR205C   | 9860.59136 | -1.0752074 | 0.17028    | -6.3143489 | 2.71E-10   | 1.01E-08   |
| YMR225C   | 172.125391 | 1.06750992 | 0.26843455 | 3.9767978  | 6.98E-05   | 0.0008637  |
| YMR227C   | 1571.7156  | 0.61119685 | 0.17962167 | 3.40268995 | 0.00066726 | 0.00557972 |
| YMR236W   | 838.008379 | -1.0473312 | 0.20228897 | -5.1774015 | 2.25E-07   | 5.22E-06   |
| YMR239C   | 2851.45058 | 0.72953395 | 0.19828149 | 3.67928411 | 0.00023389 | 0.00240032 |
| YMR246W   | 3979.51476 | -0.639595  | 0.20066944 | -3.1873066 | 0.00143604 | 0.01040919 |
| YMR250W   | 2197.50701 | -1.0221294 | 0.19757605 | -5.1733465 | 2.30E-07   | 5.31E-06   |
| YMR251W   | 317.478536 | -1.0258928 | 0.25424401 | -4.0350718 | 5.46E-05   | 0.00069324 |

|           |            |            |            |            |            |            |
|-----------|------------|------------|------------|------------|------------|------------|
| YMR251W-A | 4048.54438 | -1.090087  | 0.21795094 | -5.0015245 | 5.69E-07   | 1.22E-05   |
| YMR266W   | 3513.75446 | -0.8213958 | 0.16275561 | -5.0468052 | 4.49E-07   | 9.82E-06   |
| YMR269W   | 797.858839 | 0.65054452 | 0.19386198 | 3.35570962 | 0.00079162 | 0.00646876 |
| YMR272C   | 760.396186 | -0.6695846 | 0.18893741 | -3.5439494 | 0.00039418 | 0.00366859 |
| YMR282C   | 3637.00034 | 0.61162347 | 0.16156126 | 3.78570621 | 0.00015327 | 0.00170814 |
| YMR291W   | 845.682718 | -1.9337528 | 0.18552063 | -10.423384 | 1.94E-25   | 4.08E-23   |
| YMR294W   | 960.275555 | 0.6688376  | 0.18408891 | 3.63323128 | 0.00027989 | 0.00277436 |
| YMR295C   | 6231.62362 | -0.7737386 | 0.17756474 | -4.3575013 | 1.32E-05   | 0.00019465 |
| YMR297W   | 8779.05836 | -0.6400247 | 0.15173868 | -4.2179405 | 2.47E-05   | 0.00034003 |
| YMR303C   | 3454.65629 | -2.9663993 | 0.24226216 | -12.244584 | 1.80E-34   | 7.30E-32   |
| YMR307W   | 12184.1688 | -0.6308741 | 0.17426034 | -3.6202964 | 0.00029427 | 0.00287936 |
| YMR316W   | 705.442103 | -1.4471889 | 0.18823972 | -7.6880105 | 1.49E-14   | 9.90E-13   |
| YMR318C   | 58786.0391 | -1.0834862 | 0.14952505 | -7.2461854 | 4.29E-13   | 2.49E-11   |
| YNL003C   | 1865.40969 | -0.5845653 | 0.16187871 | -3.6111313 | 0.00030486 | 0.00297352 |
| YNL009W   | 674.512716 | -0.9281061 | 0.20780024 | -4.4663381 | 7.96E-06   | 0.00012406 |
| YNL012W   | 346.535876 | -0.9998884 | 0.21987421 | -4.5475472 | 5.43E-06   | 8.85E-05   |
| YNL031C   | 11317.3856 | -1.0999792 | 0.18587547 | -5.9178285 | 3.26E-09   | 1.09E-07   |
| YNL045W   | 1465.5471  | -0.6137854 | 0.16680447 | -3.6796701 | 0.00023354 | 0.00240032 |
| YNL046W   | 483.980459 | -0.6593398 | 0.20299486 | -3.2480618 | 0.00116194 | 0.00882091 |
| YNL069C   | 9540.62559 | -0.6186072 | 0.17213749 | -3.593681  | 0.00032604 | 0.00313986 |
| YNL071W   | 9072.05695 | -0.679747  | 0.17792021 | -3.8205161 | 0.00013317 | 0.00151742 |
| YNL104C   | 6694.09182 | -1.0235093 | 0.22339003 | -4.5817144 | 4.61E-06   | 7.60E-05   |
| YNL130C   | 1393.97685 | -0.6175502 | 0.1728544  | -3.572661  | 0.00035337 | 0.00335538 |
| YNL134C   | 7790.13665 | -1.6746758 | 0.40664821 | -4.1182421 | 3.82E-05   | 0.00050704 |
| YNL142W   | 1127.51408 | -0.8720456 | 0.18432081 | -4.7311294 | 2.23E-06   | 4.02E-05   |
| YNL147W   | 473.775035 | 0.66688575 | 0.20118961 | 3.31471266 | 0.00091737 | 0.00729115 |
| YNL162W   | 6500.58489 | -0.6268562 | 0.1828624  | -3.4280212 | 0.000608   | 0.00519825 |
| YNL163C   | 9340.78662 | 0.59235066 | 0.15744405 | 3.7622931  | 0.00016836 | 0.00182948 |
| YNL168C   | 1014.2698  | -0.7244423 | 0.20638426 | -3.5101625 | 0.00044783 | 0.00406854 |
| YNL180C   | 191.186703 | -0.7995157 | 0.25509328 | -3.1342091 | 0.00172318 | 0.01200515 |
| YNL200C   | 986.567225 | -0.8802301 | 0.17863597 | -4.9275075 | 8.33E-07   | 1.70E-05   |
| YNL202W   | 1606.56156 | -0.6667873 | 0.1786827  | -3.7316836 | 0.0001902  | 0.0020165  |
| YNL204C   | 218.319091 | 0.88105955 | 0.25466402 | 3.45969382 | 0.00054079 | 0.00473657 |
| YNL208W   | 7563.30126 | -1.1231318 | 0.15666194 | -7.1691424 | 7.55E-13   | 4.14E-11   |
| YNL215W   | 1829.43183 | 0.65914477 | 0.17560593 | 3.75354514 | 0.00017435 | 0.00188114 |
| YNL220W   | 5236.45541 | -1.5119631 | 0.15172933 | -9.9648703 | 2.17E-23   | 3.78E-21   |
| YNL231C   | 5396.14118 | -0.9400068 | 0.18072929 | -5.2011867 | 1.98E-07   | 4.61E-06   |
| YNL237W   | 1395.22689 | -0.682356  | 0.1696824  | -4.0213716 | 5.79E-05   | 0.00072725 |
| YNL239W   | 2103.18894 | -0.9548159 | 0.19085925 | -5.0027229 | 5.65E-07   | 1.22E-05   |
| YNL241C   | 1548.73104 | -1.3820875 | 0.17031816 | -8.1147395 | 4.87E-16   | 3.66E-14   |
| YNL243W   | 3829.47531 | -0.8834261 | 0.17265492 | -5.1167157 | 3.11E-07   | 6.97E-06   |
| YNL259C   | 941.43905  | -0.5926291 | 0.1866287  | -3.1754448 | 0.00149607 | 0.01079081 |
| YNL260C   | 522.219616 | -0.6910576 | 0.20086418 | -3.4404222 | 0.00058081 | 0.00501502 |
| YNL268W   | 5852.96882 | -0.7610263 | 0.17421005 | -4.3684409 | 1.25E-05   | 0.00018697 |
| YNL270C   | 784.84903  | -1.078925  | 0.19796669 | -5.450033  | 5.04E-08   | 1.31E-06   |
| YNL274C   | 1059.29802 | -1.0753264 | 0.18559795 | -5.7938487 | 6.88E-09   | 2.17E-07   |
| YNL277W   | 1406.69352 | -2.0440115 | 0.21560959 | -9.4801508 | 2.54E-21   | 3.78E-19   |
| YNL289W   | 1358.59068 | -0.8483065 | 0.19959304 | -4.2501806 | 2.14E-05   | 0.00029796 |
| YNL299W   | 2828.63451 | 0.66175646 | 0.18249448 | 3.62617257 | 0.00028765 | 0.00282373 |
| YNL318C   | 129.292406 | 1.22004021 | 0.36587528 | 3.33457946 | 0.00085428 | 0.00687034 |
| YNR001C   | 26865.1297 | -0.7389635 | 0.18801377 | -3.930369  | 8.48E-05   | 0.00102586 |
| YNR016C   | 26856.5772 | -0.8552111 | 0.18417194 | -4.643547  | 3.42E-06   | 5.80E-05   |
| YNR019W   | 4578.94318 | -0.92183   | 0.15608789 | -5.9058393 | 3.51E-09   | 1.16E-07   |
| YNR020C   | 1015.6183  | 0.58419394 | 0.17965534 | 3.25174817 | 0.00114698 | 0.00873996 |
| YNR034W-A | 756.643422 | -1.896664  | 0.19140553 | -9.9091386 | 3.80E-23   | 6.26E-21   |
| YNR056C   | 200.829863 | 1.08902732 | 0.28392814 | 3.83557373 | 0.00012527 | 0.00143815 |
| YNR067C   | 3484.38643 | -1.0293863 | 0.1939683  | -5.3069822 | 1.11E-07   | 2.74E-06   |
| YOL016C   | 1919.93039 | -0.6064303 | 0.16221742 | -3.7383796 | 0.00018521 | 0.00197385 |
| YOL019W   | 567.775287 | -0.6994817 | 0.19580997 | -3.5722475 | 0.00035393 | 0.00335546 |
| YOL032W   | 704.401425 | -0.6952797 | 0.18621404 | -3.7337663 | 0.00018864 | 0.00200687 |
| YOL039W   | 1673.37463 | -0.6190173 | 0.18154687 | -3.4096834 | 0.00065038 | 0.00549132 |
| YOL052C-A | 60.4021527 | -1.2618454 | 0.36375242 | -3.4689677 | 0.00052246 | 0.00464275 |
| YOL055C   | 887.202248 | -0.6214407 | 0.18553928 | -3.3493755 | 0.00080994 | 0.00659198 |

|           |            |            |            |            |            |            |
|-----------|------------|------------|------------|------------|------------|------------|
| YOL064C   | 2542.0271  | -0.6196211 | 0.18339314 | -3.3786496 | 0.00072843 | 0.00600067 |
| YOL077W-A | 549.918969 | 0.94071109 | 0.24170983 | 3.89190253 | 9.95E-05   | 0.00118885 |
| YOL081W   | 5976.53297 | -0.7957658 | 0.15169342 | -5.2458823 | 1.56E-07   | 3.73E-06   |
| YOL082W   | 936.307268 | -0.8512003 | 0.1784673  | -4.769503  | 1.85E-06   | 3.44E-05   |
| YOL083W   | 841.215407 | -0.899557  | 0.1909978  | -4.7097768 | 2.48E-06   | 4.39E-05   |
| YOL086C   | 96796.2657 | -1.8957578 | 0.15984488 | -11.859985 | 1.91E-32   | 5.82E-30   |
| YOL104C   | 716.708411 | -1.7601346 | 0.19612894 | -8.9743748 | 2.85E-19   | 3.47E-17   |
| YOL119C   | 3171.26754 | -1.0973961 | 0.16393803 | -6.6939689 | 2.17E-11   | 9.53E-10   |
| YOL126C   | 513.14651  | 1.10344714 | 0.21042079 | 5.24400238 | 1.57E-07   | 3.76E-06   |
| YOL141W   | 1675.59427 | 0.62939083 | 0.17146142 | 3.67074312 | 0.00024185 | 0.00247365 |
| YOL143C   | 585.39896  | 0.65405751 | 0.19282349 | 3.3920011  | 0.00069384 | 0.00576248 |
| YOL151W   | 5109.99258 | -2.8540171 | 0.24061429 | -11.861378 | 1.88E-32   | 5.82E-30   |
| YOL158C   | 6147.49947 | -1.1124858 | 0.23321815 | -4.7701509 | 1.84E-06   | 3.44E-05   |
| YOR008C   | 4080.39837 | -0.5939392 | 0.1595383  | -3.7228627 | 0.00019698 | 0.00207029 |
| YOR047C   | 321.565641 | 0.96889519 | 0.22870384 | 4.23646235 | 2.27E-05   | 0.00031603 |
| YOR052C   | 1573.9297  | -0.7583965 | 0.18279939 | -4.1487913 | 3.34E-05   | 0.00044978 |
| YOR099W   | 5546.43559 | -0.8115842 | 0.17065184 | -4.7557892 | 1.98E-06   | 3.63E-05   |
| YOR100C   | 573.260942 | -1.1499311 | 0.20147532 | -5.7075532 | 1.15E-08   | 3.36E-07   |
| YOR111W   | 683.417458 | -0.8360895 | 0.21522083 | -3.8847981 | 0.00010241 | 0.001217   |
| YOR120W   | 5861.51235 | -0.6334794 | 0.15521811 | -4.0812212 | 4.48E-05   | 0.0005823  |
| YOR133W   | 2703.22499 | -0.5991707 | 0.16246546 | -3.687988  | 0.00022603 | 0.00233148 |
| YOR134W   | 100.721854 | -0.9640676 | 0.30926132 | -3.1173235 | 0.00182501 | 0.01257093 |
| YOR142W   | 1837.24049 | -0.659741  | 0.17592099 | -3.7502123 | 0.00017668 | 0.00190295 |
| YOR153W   | 36335.9808 | -0.8441892 | 0.15028302 | -5.6173288 | 1.94E-08   | 5.42E-07   |
| YOR154W   | 2043.34973 | 0.62274897 | 0.17349239 | 3.58948876 | 0.00033133 | 0.00318195 |
| YOR157C   | 2148.79137 | -1.3828509 | 0.18372551 | -7.5267222 | 5.20E-14   | 3.30E-12   |
| YOR161C   | 1002.05762 | -1.5054852 | 0.19252223 | -7.8197996 | 5.29E-15   | 3.71E-13   |
| YOR173W   | 1324.74979 | -1.1615772 | 0.17039547 | -6.8169488 | 9.30E-12   | 4.39E-10   |
| YOR184W   | 8878.07532 | -0.7208322 | 0.16676109 | -4.3225441 | 1.54E-05   | 0.0002244  |
| YOR185C   | 536.778085 | -0.6670253 | 0.20156625 | -3.3092112 | 0.00093559 | 0.00738779 |
| YOR190W   | 232.452076 | 0.90872043 | 0.25542055 | 3.55774204 | 0.00037406 | 0.00350807 |
| YOR192C-C | 78.7666595 | -1.1450299 | 0.33611498 | -3.4066613 | 0.00065763 | 0.00552951 |
| YOR202W   | 153.614406 | 4.53278156 | 0.34127987 | 13.2817136 | 2.96E-40   | 1.39E-37   |
| YOR203W   | 14.0365632 | 1.57508173 | 0.41743146 | 3.77327029 | 0.00016112 | 0.00177279 |
| YOR220W   | 1230.71857 | -0.7159194 | 0.19014565 | -3.7651104 | 0.00016648 | 0.0018122  |
| YOR226C   | 304.526411 | -1.6599871 | 0.23339838 | -7.1122479 | 1.14E-12   | 6.10E-11   |
| YOR230W   | 5619.31228 | -1.1560667 | 0.17364111 | -6.6577936 | 2.78E-11   | 1.17E-09   |
| YOR264W   | 1961.3571  | -0.6594877 | 0.17947899 | -3.6744563 | 0.00023836 | 0.00244205 |
| YOR271C   | 1971.68375 | -1.1769472 | 0.20980878 | -5.6096185 | 2.03E-08   | 5.62E-07   |
| YOR273C   | 1608.35243 | -1.3319796 | 0.19879364 | -6.7003128 | 2.08E-11   | 9.19E-10   |
| YOR285W   | 5514.73198 | -0.6322343 | 0.18293724 | -3.4560178 | 0.00054822 | 0.0047606  |
| YOR287C   | 966.564556 | 0.64355014 | 0.20157028 | 3.19268368 | 0.00140957 | 0.01026861 |
| YOR289W   | 1228.55941 | -0.6356585 | 0.17404908 | -3.6521798 | 0.00026002 | 0.00264184 |
| YOR298C-A | 4419.14129 | -0.6186242 | 0.1883052  | -3.2852209 | 0.00101902 | 0.00790327 |
| YOR298W   | 138.381221 | 1.21208614 | 0.28829164 | 4.20437491 | 2.62E-05   | 0.00035945 |
| YOR306C   | 847.71095  | -0.8520801 | 0.25244703 | -3.3752827 | 0.0007374  | 0.00606638 |
| YOR313C   | 430.604251 | 0.95896638 | 0.25221278 | 3.80221162 | 0.00014341 | 0.00161595 |
| YOR315W   | 558.996656 | 0.94259479 | 0.19490724 | 4.83611988 | 1.32E-06   | 2.58E-05   |
| YOR316C   | 2548.42117 | -1.2752571 | 0.19114339 | -6.6717303 | 2.53E-11   | 1.07E-09   |
| YOR327C   | 423.884273 | -1.3824565 | 0.2114924  | -6.5366723 | 6.29E-11   | 2.44E-09   |
| YOR332W   | 2072.70127 | -0.9102627 | 0.1958169  | -4.6485401 | 3.34E-06   | 5.71E-05   |
| YOR347C   | 1874.60129 | -1.364269  | 0.19970416 | -6.8314502 | 8.41E-12   | 4.00E-10   |
| YOR348C   | 2374.13594 | -0.8015184 | 0.24741268 | -3.2396012 | 0.00119697 | 0.00901944 |
| YOR356W   | 11933.8957 | 0.92545201 | 0.187637   | 4.93214035 | 8.13E-07   | 1.67E-05   |
| YOR374W   | 6905.72895 | -1.9538865 | 0.16413737 | -11.903971 | 1.13E-32   | 3.82E-30   |
| YOR375C   | 41283.2839 | -1.9069137 | 0.16913746 | -11.274343 | 1.76E-29   | 4.46E-27   |
| YOR381W   | 1952.50586 | -1.002451  | 0.21606175 | -4.6396502 | 3.49E-06   | 5.88E-05   |
| YOR382W   | 2096.74729 | -2.3225052 | 0.40121252 | -5.7887157 | 7.09E-09   | 2.23E-07   |
| YOR383C   | 1194.16644 | -2.7206445 | 0.25766835 | -10.558706 | 4.63E-26   | 1.05E-23   |
| YOR384W   | 4450.34682 | -1.8764836 | 0.22655578 | -8.282656  | 1.20E-16   | 1.01E-14   |
| YOR386W   | 845.802186 | -0.6690202 | 0.20874242 | -3.2050037 | 0.00135061 | 0.00995562 |
| YOR388C   | 369.719168 | 1.21558793 | 0.27277323 | 4.45640479 | 8.33E-06   | 0.00012895 |
| YOR389W   | 277.548996 | -0.7250596 | 0.23160389 | -3.1306018 | 0.00174449 | 0.0121397  |
| YPL004C   | 2854.07043 | -0.7222056 | 0.15913053 | -4.5384476 | 5.67E-06   | 9.19E-05   |

|           |            |            |            |            |            |            |
|-----------|------------|------------|------------|------------|------------|------------|
| YPL015C   | 651.444583 | -0.8524661 | 0.21075166 | -4.0448845 | 5.23E-05   | 0.00067183 |
| YPL017C   | 375.896281 | -1.2557688 | 0.22846334 | -5.4965878 | 3.87E-08   | 1.02E-06   |
| YPL019C   | 11277.8321 | -2.0286974 | 0.14867805 | -13.644902 | 2.17E-42   | 1.30E-39   |
| YPL031C   | 1580.1996  | -0.8661368 | 0.18623288 | -4.6508265 | 3.31E-06   | 5.66E-05   |
| YPL043W   | 3765.05444 | 0.94331799 | 0.20818355 | 4.53118413 | 5.87E-06   | 9.35E-05   |
| YPL048W   | 7690.18516 | -0.5855363 | 0.18592967 | -3.1492353 | 0.00163698 | 0.01156321 |
| YPL061W   | 10685.2539 | -0.8448873 | 0.15385585 | -5.4914211 | 3.99E-08   | 1.04E-06   |
| YPL067C   | 1137.4299  | -1.4709028 | 0.22595986 | -6.5095756 | 7.54E-11   | 2.91E-09   |
| YPL074W   | 4583.86663 | 0.60391461 | 0.1655396  | 3.64815794 | 0.00026413 | 0.00267018 |
| YPL075W   | 1482.32611 | -0.8357287 | 0.18070419 | -4.6248441 | 3.75E-06   | 6.23E-05   |
| YPL087W   | 1528.44234 | -0.6358719 | 0.1725047  | -3.6861134 | 0.0002277  | 0.00234475 |
| YPL088W   | 1028.28744 | -1.2089925 | 0.21487038 | -5.6266132 | 1.84E-08   | 5.19E-07   |
| YPL091W   | 8865.32041 | -0.8419171 | 0.15928594 | -5.2855706 | 1.25E-07   | 3.04E-06   |
| YPL092W   | 545.994586 | -0.63214   | 0.19682849 | -3.2116284 | 0.00131985 | 0.00976432 |
| YPL099C   | 984.715638 | -0.6996614 | 0.18944976 | -3.6931239 | 0.00022152 | 0.00229653 |
| YPL154C   | 10715.761  | -1.0504759 | 0.15075129 | -6.9682717 | 3.21E-12   | 1.62E-10   |
| YPL170W   | 1448.53184 | -0.6870678 | 0.20818885 | -3.3002144 | 0.00096611 | 0.00758944 |
| YPL171C   | 2598.19976 | -1.8505461 | 0.42195219 | -4.3856773 | 1.16E-05   | 0.00017447 |
| YPL187W   | 2575.45892 | 0.62023943 | 0.17396228 | 3.5653674  | 0.00036335 | 0.00342873 |
| YPL203W   | 1539.77078 | -0.9918988 | 0.16603637 | -5.9739849 | 2.32E-09   | 7.84E-08   |
| YPL217C   | 15244.8107 | 0.81952184 | 0.19046002 | 4.3028549  | 1.69E-05   | 0.00024299 |
| YPL221W   | 11004.0936 | -0.6519028 | 0.15580559 | -4.1840781 | 2.86E-05   | 0.00039048 |
| YPL222W   | 2658.27328 | -0.5802451 | 0.16731225 | -3.4680369 | 0.00052428 | 0.00465208 |
| YPL223C   | 117.131307 | -1.3232206 | 0.32347443 | -4.0906498 | 4.30E-05   | 0.00056272 |
| YPL263C   | 8898.89232 | 0.7505188  | 0.16027772 | 4.6826147  | 2.83E-06   | 4.93E-05   |
| YPL265W   | 5189.89783 | -1.1372199 | 0.19017233 | -5.9799438 | 2.23E-09   | 7.60E-08   |
| YPL274W   | 4747.39415 | -0.9182487 | 0.1669962  | -5.49862   | 3.83E-08   | 1.01E-06   |
| YPR001W   | 729.594093 | -1.0392008 | 0.19260918 | -5.3953853 | 6.84E-08   | 1.74E-06   |
| YPR004C   | 1776.9473  | -0.7592933 | 0.18793593 | -4.040171  | 5.34E-05   | 0.00068348 |
| YPR035W   | 6049.50012 | -1.5977569 | 0.17566194 | -9.0956349 | 9.40E-20   | 1.25E-17   |
| YPR036W   | 12820.695  | -0.7177918 | 0.17414575 | -4.1217877 | 3.76E-05   | 0.00050258 |
| YPR036W-A | 329.310358 | -0.8039777 | 0.21996587 | -3.6550113 | 0.00025717 | 0.00262159 |
| YPR069C   | 7214.85496 | -1.1803631 | 0.17400052 | -6.7836754 | 1.17E-11   | 5.41E-10   |
| YPR074C   | 12276.2088 | -1.2921948 | 0.17631776 | -7.3287843 | 2.32E-13   | 1.40E-11   |
| YPR075C   | 4132.72622 | -0.6145997 | 0.19057179 | -3.2250297 | 0.0012596  | 0.00938692 |
| YPR080W   | 25027.4584 | -0.6631787 | 0.17593849 | -3.7693781 | 0.00016365 | 0.00179109 |
| YPR082C   | 534.367265 | 0.67675173 | 0.20395946 | 3.31806989 | 0.00090642 | 0.00724395 |
| YPR093C   | 876.428052 | -0.8199956 | 0.18879984 | -4.3432007 | 1.40E-05   | 0.00020528 |
| YPR100W   | 1983.37516 | 0.61335814 | 0.17874926 | 3.43138839 | 0.0006005  | 0.00516312 |
| YPR112C   | 8683.83938 | 0.64674318 | 0.17333781 | 3.7311142  | 0.00019063 | 0.00201755 |
| YPR113W   | 3076.1309  | -0.6817457 | 0.15925411 | -4.2808672 | 1.86E-05   | 0.00026209 |
| YPR127W   | 1660.0031  | -0.6228004 | 0.16618925 | -3.7475371 | 0.00017858 | 0.00191322 |
| YPR145W   | 18627.6905 | -0.6678951 | 0.17327983 | -3.8544308 | 0.000116   | 0.00134436 |
| YPR152C   | 1159.34839 | 0.6013228  | 0.18244401 | 3.29593055 | 0.00098096 | 0.00768631 |
| YPR160W   | 6893.91619 | -1.4204113 | 0.16319932 | -8.7035366 | 3.22E-18   | 3.38E-16   |
| YPR167C   | 337.39667  | -1.1132888 | 0.22457404 | -4.9573353 | 7.15E-07   | 1.49E-05   |
| YPR184W   | 4954.22991 | -1.1311885 | 0.18470976 | -6.1241407 | 9.12E-10   | 3.31E-08   |

**Table S3 Significant anti-sense expression changes in *brr6-1* versus wild type (galactose)**

|           | Antisense<br>baseMean | Antisense<br>log2FoldChar | Antisense<br>lfcSE | Antisense<br>stat | Antisense<br>pvalue | Antisense<br>padj |
|-----------|-----------------------|---------------------------|--------------------|-------------------|---------------------|-------------------|
| YAL037C-A | 3256.26038            | -2.1976294                | 0.38542355         | -5.7018556        | 1.1851E-08          | 1.0634E-06        |
| YAL037C-B | 114715.048            | -2.3885998                | 0.37891822         | -6.3037342        | 2.9056E-10          | 3.9875E-08        |
| YAL044W-A | 3333.17977            | -1.7131062                | 0.36396518         | -4.7067859        | 2.5165E-06          | 0.00013872        |
| YAL059C-A | 3388.91215            | -1.4271053                | 0.37799932         | -3.7754177        | 0.00015974          | 0.00388201        |
| YBL065W   | 481.723073            | -2.0911794                | 0.37283071         | -5.6089247        | 2.0359E-08          | 1.6378E-06        |
| YBR055C   | 374.595526            | -1.5742845                | 0.35782873         | -4.3995476        | 1.0848E-05          | 0.00042894        |
| YBR069C   | 381.418154            | -1.2092855                | 0.33609284         | -3.5980697        | 0.00032059          | 0.00623276        |
| YBR072C-A | 817.350646            | -3.4632661                | 0.39189954         | -8.8371275        | 9.8211E-19          | 5.7282E-16        |
| YBR089W   | 1036.77438            | -1.4334467                | 0.3877839          | -3.6965091        | 0.00021858          | 0.00473629        |
| YBR126W-B | 168.635187            | -1.304963                 | 0.39141521         | -3.3339609        | 0.00085619          | 0.01286727        |
| YBR127C   | 248.468872            | -1.2834461                | 0.38739565         | -3.3130112        | 0.00092297          | 0.01325159        |
| YBR230W-A | 109921.048            | -1.267344                 | 0.34138388         | -3.7123721        | 0.00020533          | 0.0046642         |
| YBR290W   | 351.069631            | -1.4622962                | 0.39654335         | -3.6876074        | 0.00022637          | 0.0048452         |
| YCL014W   | 366.069275            | 1.20653643                | 0.3483038          | 3.46403465        | 0.00053214          | 0.00933442        |
| YCL018W   | 1178.94095            | 2.7579986                 | 0.35055034         | 7.86762499        | 3.6144E-15          | 1.4054E-12        |
| YCL024W   | 270.0255              | 1.31351316                | 0.37004487         | 3.54960511        | 0.00038581          | 0.00708735        |
| YCR018C-A | 194.947916            | -1.7458446                | 0.39382902         | -4.4330013        | 9.293E-06           | 0.0003738         |
| YCR032W   | 249.652147            | 1.27165657                | 0.36018058         | 3.5306084         | 0.00041461          | 0.00755683        |
| YCR033W   | 223.955217            | 1.24129711                | 0.34570267         | 3.59064945        | 0.00032986          | 0.0063078         |
| YCR042C   | 233.269204            | 1.22114861                | 0.33860213         | 3.60644102        | 0.00031043          | 0.00613748        |
| YCR053W   | 247.04813             | 1.1759984                 | 0.34121206         | 3.44653238        | 0.00056783          | 0.0096697         |
| YCR065W   | 168.07638             | 1.16481388                | 0.35365712         | 3.29362486        | 0.00098904          | 0.01373476        |
| YCR073C   | 224.39193             | 1.35178381                | 0.34272904         | 3.94417651        | 8.0075E-05          | 0.00222398        |
| YCR077C   | 177.13644             | 1.39058375                | 0.35934653         | 3.86975705        | 0.00010894          | 0.0028558         |
| YDL045W-A | 155.93859             | -1.4012579                | 0.3702807          | -3.7843126        | 0.00015413          | 0.00378521        |
| YDL065C   | 2163.3675             | -1.8701222                | 0.35858963         | -5.2152153        | 1.836E-07           | 1.1899E-05        |
| YDL094C   | 1375.48027            | -1.3365506                | 0.36955523         | -3.6166465        | 0.00029844          | 0.00595103        |
| YDL096C   | 1158.86445            | -1.3317622                | 0.36465692         | -3.6520964        | 0.00026011          | 0.0052768         |
| YDL118W   | 415.739147            | -1.2214814                | 0.35393545         | -3.4511418        | 0.00055822          | 0.00957594        |
| YDL128W   | 349.833551            | -1.5936929                | 0.38381372         | -4.1522561        | 3.2921E-05          | 0.00108177        |
| YDL167C   | 541.202538            | -1.1236279                | 0.33262319         | -3.3780803        | 0.00072994          | 0.01150638        |
| YDR010C   | 1628.1429             | -1.3804934                | 0.36591593         | -3.7727063        | 0.00016149          | 0.003884          |
| YDR031W   | 862.743005            | -1.6981688                | 0.32946864         | -5.1542655        | 2.5463E-07          | 1.5633E-05        |
| YDR034C-A | 9923.56029            | -2.3214506                | 0.37199033         | -6.2406207        | 4.3584E-10          | 5.6489E-08        |
| YDR078C   | 325.436987            | -1.2715304                | 0.34366535         | -3.6999087        | 0.00021568          | 0.00473629        |
| YDR263C   | 187.076081            | -1.4068234                | 0.37952371         | -3.7068129        | 0.00020988          | 0.00470826        |
| YDR271C   | 2151.94417            | -1.3867318                | 0.37949244         | -3.6541749        | 0.00025801          | 0.0052768         |
| YDR366C   | 9053.47122            | -2.374643                 | 0.37201731         | -6.3831519        | 1.7348E-10          | 2.5295E-08        |
| YDR369C   | 788.651819            | -1.5427123                | 0.34486354         | -4.4733992        | 7.6986E-06          | 0.00033261        |
| YDR515W   | 754.625817            | -1.5490882                | 0.37037744         | -4.1824584        | 2.8837E-05          | 0.00098938        |
| YEL020W-A | 2869.78183            | -1.0918668                | 0.32022723         | -3.4096624        | 0.00065043          | 0.01061161        |
| YEL053W-A | 5632.51357            | -1.4433461                | 0.39206324         | -3.6814115        | 0.00023195          | 0.00487505        |
| YER019W   | 2209.14978            | -1.2429336                | 0.34866842         | -3.5648011        | 0.00036413          | 0.00674223        |
| YER038C   | 360.384245            | -2.2653072                | 0.36386655         | -6.225654         | 4.7955E-10          | 5.8884E-08        |
| YER071C   | 274.667591            | -1.2203192                | 0.35622839         | -3.4256651        | 0.0006133           | 0.01007619        |
| YER088W-B | 593.470226            | -1.3936853                | 0.35993544         | -3.8720425        | 0.00010793          | 0.0028558         |
| YER133W-A | 646.513367            | -1.2173089                | 0.35164918         | -3.461714         | 0.00053675          | 0.00934501        |
| YER145C-A | 614.657337            | -1.3233957                | 0.38930785         | -3.3993552        | 0.00067545          | 0.01086775        |
| YFL010W-A | 4126.11393            | -1.5450157                | 0.38811609         | -3.9808081        | 6.8681E-05          | 0.00197819        |
| YFL013C   | 510.646341            | -1.953636                 | 0.33324733         | -5.8624206        | 4.5617E-09          | 4.257E-07         |
| YFL031C-A | 11013.9353            | -1.5448593                | 0.37279549         | -4.143986         | 3.4132E-05          | 0.00110597        |
| YFL046W   | 4039.02296            | -1.2639672                | 0.3628027          | -3.483897         | 0.00049417          | 0.00873407        |
| YFR035C   | 210.003207            | -1.2310149                | 0.37195392         | -3.3095897        | 0.00093433          | 0.01329139        |
| YFR052W   | 1960.00285            | -1.9890518                | 0.37098531         | -5.3615378        | 8.2516E-08          | 6.21E-06          |
| YGL010W   | 1218.5811             | -2.3725251                | 0.35679523         | -6.6495426        | 2.9401E-11          | 5.716E-09         |
| YGL011C   | 1020.59202            | -1.3299734                | 0.35475094         | -3.7490341        | 0.00017752          | 0.0041833         |
| YGL246C   | 444.073494            | 1.37144078                | 0.35680499         | 3.84367037        | 0.00012121          | 0.00307367        |
| YGL247W   | 3324.16672            | 2.45419612                | 0.37004987         | 6.63206851        | 3.3101E-11          | 5.9404E-09        |
| YGL248W   | 1405.95473            | 4.68494848                | 0.35322403         | 13.263391         | 3.7744E-40          | 8.8056E-37        |
| YGR007W   | 786.548009            | -1.6256432                | 0.35594144         | -4.5671647        | 4.9437E-06          | 0.00023538        |
| YGR015C   | 237.361945            | -1.4636581                | 0.35996812         | -4.0660771        | 4.7811E-05          | 0.00146768        |
| YGR105W   | 702.79636             | -1.173298                 | 0.35258489         | -3.3277036        | 0.00087565          | 0.01286727        |

|           |            |            |            |            |            |            |
|-----------|------------|------------|------------|------------|------------|------------|
| YGR154C   | 292.010428 | -1.379163  | 0.37735474 | -3.6548182 | 0.00025736 | 0.0052768  |
| YGR174W-A | 1854.76512 | -1.3304624 | 0.37212043 | -3.5753543 | 0.00034975 | 0.00652781 |
| YGR208W   | 1855.00882 | -1.6734246 | 0.31974193 | -5.2336728 | 1.6617E-07 | 1.1077E-05 |
| YGR232W   | 389.427521 | -1.8520946 | 0.37498618 | -4.9391009 | 7.8484E-07 | 4.6949E-05 |
| YGR235C   | 8650.37996 | -1.3954153 | 0.32581434 | -4.2828543 | 1.8451E-05 | 0.00065222 |
| YGR255C   | 2236.78998 | -3.224312  | 0.33080279 | -9.7469309 | 1.9013E-22 | 1.4786E-19 |
| YGR270C-A | 595.483806 | -1.1199618 | 0.3313835  | -3.3796546 | 0.00072577 | 0.01150638 |
| YGR283C   | 155.065876 | -1.2162297 | 0.34622959 | -3.5127839 | 0.00044344 | 0.00795801 |
| YHL014C   | 6663.11272 | -1.5570057 | 0.40484975 | -3.8458853 | 0.00012012 | 0.00307367 |
| YHL034W-A | 6286.64913 | -1.5753456 | 0.36569284 | -4.3078383 | 1.6486E-05 | 0.00059171 |
| YHL036W   | 560.951775 | -1.5211087 | 0.36559535 | -4.1606347 | 3.1736E-05 | 0.00105773 |
| YHL046W-A | 1223.06307 | -1.8614028 | 0.4058967  | -4.5859027 | 4.5203E-06 | 0.0002197  |
| YHR028W-A | 622.566848 | -1.3922915 | 0.34401846 | -4.0471419 | 5.1847E-05 | 0.0015632  |
| YHR040W   | 392.36954  | -1.3771751 | 0.3825172  | -3.600296  | 0.00031786 | 0.00623156 |
| YHR049C-A | 1365.91625 | -1.612745  | 0.37342081 | -4.3188409 | 1.5685E-05 | 0.00057177 |
| YHR137C-A | 601.339646 | -1.6728949 | 0.36884692 | -4.5354721 | 5.7475E-06 | 0.00026818 |
| YHR138C   | 287.754942 | -1.3564585 | 0.35381006 | -3.8338609 | 0.00012615 | 0.00313087 |
| YHR191C   | 1065.51968 | -1.1804567 | 0.35817011 | -3.295799  | 0.00098142 | 0.01371053 |
| YHR202W   | 892.315084 | -1.2654931 | 0.38274972 | -3.3063202 | 0.0009453  | 0.01336597 |
| YIL009C-A | 282.071469 | -1.3506659 | 0.36297529 | -3.7210961 | 0.00019836 | 0.00458192 |
| YIL095W   | 2156.94795 | -1.3800152 | 0.40822923 | -3.3804909 | 0.00072356 | 0.01150638 |
| YIL118W   | 152.534923 | -1.3005653 | 0.37848674 | -3.4362241 | 0.00058988 | 0.00990069 |
| YIR018C-A | 396.522999 | -1.5031278 | 0.37510326 | -4.0072373 | 6.1433E-05 | 0.00179154 |
| YJL015C   | 337.486491 | -1.3218835 | 0.35996221 | -3.6722842 | 0.00024039 | 0.00500745 |
| YJL026C-A | 2183.24276 | -1.4028331 | 0.359835   | -3.8985455 | 9.6772E-05 | 0.00262523 |
| YJL067W   | 360.013149 | -1.2563496 | 0.36521198 | -3.440056  | 0.00058159 | 0.00983231 |
| YJL134W   | 203.641293 | -2.0617985 | 0.38748278 | -5.3210069 | 1.0319E-07 | 7.2955E-06 |
| YJL152W   | 869.498564 | -1.63291   | 0.38362812 | -4.2564918 | 2.0766E-05 | 0.00072309 |
| YJR008W   | 4216.80806 | -2.2008733 | 0.36082963 | -6.0994804 | 1.0641E-09 | 1.1703E-07 |
| YJR018W   | 333.77552  | -1.4605835 | 0.38063408 | -3.8372379 | 0.00012443 | 0.00312135 |
| YJR103W   | 5453.90098 | -1.5003772 | 0.34618408 | -4.3340443 | 1.4639E-05 | 0.00054213 |
| YJR104C   | 911.290916 | -1.5205862 | 0.3468021  | -4.3845934 | 1.162E-05  | 0.00044443 |
| YKL006C-A | 804.287435 | -1.3153442 | 0.37702279 | -3.4887659 | 0.00048526 | 0.008642   |
| YKL030W   | 772.162312 | -1.758737  | 0.42700467 | -4.1187769 | 3.8089E-05 | 0.00121728 |
| YKL051W   | 475.325257 | -1.5567911 | 0.38527199 | -4.0407585 | 5.3279E-05 | 0.0015734  |
| YKL053W   | 1258.85618 | -1.2550294 | 0.37552244 | -3.3420888 | 0.0008315  | 0.01284702 |
| YKL065W-A | 260.40253  | -1.2126491 | 0.36514477 | -3.321009  | 0.00089693 | 0.01307831 |
| YKL119C   | 408.951964 | -2.6146966 | 0.40167015 | -6.5095616 | 7.537E-11  | 1.1723E-08 |
| YKL153W   | 58531.9172 | -2.4233799 | 0.35839834 | -6.761694  | 1.3639E-11 | 2.8927E-09 |
| YKL206C   | 965.687353 | -1.2196517 | 0.36614837 | -3.3310314 | 0.00086525 | 0.01286727 |
| YKR051W   | 484.181959 | -1.6436066 | 0.3657088  | -4.4943041 | 6.9798E-06 | 0.00030724 |
| YKR070W   | 208.428376 | -1.1357198 | 0.3380992  | -3.359132  | 0.00078188 | 0.01224241 |
| YKR028C   | 29321.0619 | -1.570298  | 0.32567564 | -4.8216624 | 1.4237E-06 | 8.3035E-05 |
| YLR057W   | 485.632083 | -1.4340358 | 0.354497   | -4.0452693 | 5.2263E-05 | 0.0015632  |
| YLR062C   | 12508.916  | -1.3614411 | 0.41050034 | -3.3165407 | 0.00091139 | 0.01320671 |
| YLR204W   | 511.840721 | -1.548509  | 0.34650663 | -4.4689159 | 7.8617E-06 | 0.00033348 |
| YLR215C   | 1267.50865 | -1.5910808 | 0.38081804 | -4.1780605 | 2.9401E-05 | 0.00099408 |
| YLR259C   | 288.149835 | -1.5794884 | 0.34048129 | -4.6389874 | 3.5012E-06 | 0.00017757 |
| YLR283W   | 368.444309 | -1.4309788 | 0.3696125  | -3.871565  | 0.00010814 | 0.0028558  |
| YLR299C-A | 826.711108 | -1.2002483 | 0.36072805 | -3.3272942 | 0.00087694 | 0.01286727 |
| YLR326W   | 1769.08811 | -2.0173662 | 0.37722185 | -5.3479569 | 8.8953E-08 | 6.4852E-06 |
| YLR339C   | 11353.907  | -1.2704008 | 0.38161382 | -3.3290219 | 0.00087152 | 0.01286727 |
| YLR345W   | 332.611264 | -2.2188585 | 0.33542738 | -6.6150191 | 3.715E-11  | 6.1908E-09 |
| YLR349W   | 1122.12265 | -1.730288  | 0.37536338 | -4.6096345 | 4.0338E-06 | 0.00020023 |
| YLR350W   | 484.017236 | -1.2597651 | 0.36720149 | -3.4307189 | 0.00060198 | 0.01003163 |
| YLR353W   | 3588.08408 | -1.2478637 | 0.37390366 | -3.3373937 | 0.00084568 | 0.01286727 |
| YML122C   | 232.762498 | 2.009463   | 0.3423968  | 5.86881355 | 4.3892E-09 | 4.257E-07  |
| YML123C   | 648.354458 | 2.33758556 | 0.32862043 | 7.11333002 | 1.1328E-12 | 3.7753E-10 |
| YML130C   | 374.859003 | -2.2389503 | 0.33086469 | -6.7669666 | 1.3151E-11 | 2.8927E-09 |
| YMR040W   | 199.471282 | -1.6842263 | 0.35807535 | -4.7035528 | 2.5567E-06 | 0.00013872 |
| YMR094W   | 375.5183   | -1.8375801 | 0.38401748 | -4.7851471 | 1.7086E-06 | 9.7225E-05 |
| YMR097C   | 375.479719 | -1.6768092 | 0.37265281 | -4.4996554 | 6.8064E-06 | 0.00030537 |
| YMR119W-A | 399.651836 | -1.9978145 | 0.38471734 | -5.1929411 | 2.07E-07   | 1.3052E-05 |
| YMR193C-A | 395.46332  | -1.2826588 | 0.37667786 | -3.4051878 | 0.00066119 | 0.01071213 |
| YMR245W   | 776.119137 | -1.2699363 | 0.3704318  | -3.4282595 | 0.00060746 | 0.01005117 |

|           |            |            |            |            |            |            |
|-----------|------------|------------|------------|------------|------------|------------|
| YMR252C   | 795.588662 | -1.3330427 | 0.33781266 | -3.9461004 | 7.9434E-05 | 0.00222398 |
| YMR272W-A | 266.952044 | -1.2574106 | 0.37468036 | -3.3559555 | 0.00079091 | 0.01230133 |
| YMR294W-A | 5920.29551 | -1.4099818 | 0.37988104 | -3.7116405 | 0.00020592 | 0.0046642  |
| YMR307C-A | 3971.58686 | -1.3768679 | 0.38060338 | -3.6175925 | 0.00029736 | 0.00595103 |
| YMR316C-A | 403.131328 | -1.7168843 | 0.36608285 | -4.6898791 | 2.7337E-06 | 0.00014495 |
| YNL032W   | 7194.44934 | -1.7259615 | 0.38111467 | -4.5287196 | 5.9342E-06 | 0.00027146 |
| YNL103W-A | 296.312708 | -1.6128903 | 0.39208479 | -4.1136262 | 3.8949E-05 | 0.00122795 |
| YNL203C   | 862.66974  | -1.2975046 | 0.36212679 | -3.5830119 | 0.00033966 | 0.0064424  |
| YNL232W   | 674.257286 | -1.6469677 | 0.36977477 | -4.4539753 | 8.4295E-06 | 0.00035118 |
| YNL275W   | 273.727856 | -1.344529  | 0.34289678 | -3.9210895 | 8.815E-05  | 0.00241945 |
| YNL276C   | 745.540253 | -2.7006589 | 0.32921674 | -8.2032857 | 2.339E-16  | 1.0914E-13 |
| YNR015W   | 1037.9855  | -1.4083689 | 0.3810798  | -3.6957322 | 0.00021925 | 0.00473629 |
| YNR020C   | 329.846978 | -1.4773114 | 0.35948651 | -4.1095044 | 3.9651E-05 | 0.00123341 |
| YNR035C   | 422.715352 | -1.9083613 | 0.35905818 | -5.3149083 | 1.0671E-07 | 7.3223E-06 |
| YNR056C   | 333.044735 | -1.6933122 | 0.3858854  | -4.3881221 | 1.1433E-05 | 0.00044443 |
| YOL047C   | 249.747693 | -1.3018714 | 0.36215064 | -3.5948339 | 0.0003246  | 0.00625858 |
| YOL083C-A | 329.613114 | -1.5348668 | 0.34593366 | -4.436882  | 9.1271E-06 | 0.00037357 |
| YOL086W-A | 18422.7086 | -2.4674223 | 0.35827398 | -6.8869704 | 5.6993E-12 | 1.4774E-09 |
| YOL150C   | 2920.38112 | -3.3310514 | 0.32248319 | -10.32938  | 5.1895E-25 | 6.0535E-22 |
| YOL152W   | 340.309326 | -1.2879534 | 0.33355227 | -3.8613239 | 0.00011277 | 0.00292336 |
| YOL155C   | 20967.5396 | -1.2323736 | 0.33322291 | -3.6983458 | 0.00021701 | 0.00473629 |
| YOR071C   | 345.493409 | -1.3262356 | 0.35328622 | -3.7539975 | 0.00017404 | 0.00414314 |
| YOR121C   | 3816.74952 | -1.3282804 | 0.36054052 | -3.6841362 | 0.00022948 | 0.00486705 |
| YOR161W-A | 218.160352 | -1.989191  | 0.35448262 | -5.6115334 | 2.0054E-08 | 1.6378E-06 |
| YOR161W-B | 373.688227 | -2.070881  | 0.3441561  | -6.0172725 | 1.7738E-09 | 1.7993E-07 |
| YOR225W   | 369.820786 | -2.3320392 | 0.37689246 | -6.1875453 | 6.1108E-10 | 7.1283E-08 |
| YOR263C   | 642.004976 | -1.2833526 | 0.37115147 | -3.4577598 | 0.00054469 | 0.00941299 |
| YOR272W   | 168.560654 | -1.2980798 | 0.34676825 | -3.7433641 | 0.00018157 | 0.00423609 |
| YOR331C   | 1687.21069 | -1.5359316 | 0.38696723 | -3.9691515 | 7.2129E-05 | 0.00205216 |
| YOR333C   | 505.365479 | -1.2536799 | 0.37668263 | -3.3282126 | 0.00087405 | 0.01286727 |
| YOR346W   | 559.037094 | -1.1421878 | 0.34569794 | -3.3040051 | 0.00095314 | 0.01339565 |
| YOR374W   | 1224.47059 | -2.0837921 | 0.36676407 | -5.6815601 | 1.3347E-08 | 1.1533E-06 |
| YOR375C   | 283.848557 | -1.764283  | 0.37789419 | -4.6687223 | 3.0308E-06 | 0.00015713 |
| YPL018W   | 239.504044 | -1.6686642 | 0.38366888 | -4.3492299 | 1.3662E-05 | 0.00051407 |
| YPL056C   | 153.719533 | -1.2329519 | 0.34440011 | -3.5799986 | 0.0003436  | 0.00646459 |
| YPL222C-A | 606.606811 | -1.2183431 | 0.3678416  | -3.3121405 | 0.00092585 | 0.01325159 |
| YPR002C-A | 1605.67055 | -2.6908417 | 0.38784972 | -6.9378462 | 3.9812E-12 | 1.161E-09  |
| YPR081C   | 10594.4037 | -1.2639192 | 0.37845086 | -3.3397182 | 0.00083863 | 0.01286727 |
| YPR128C   | 385.390285 | -1.2139038 | 0.3450692  | -3.5178561 | 0.00043505 | 0.00786796 |
| YPR138C   | 251.455128 | -2.1668468 | 0.35559077 | -6.0936532 | 1.1036E-09 | 1.1703E-07 |
| YPR160C-A | 1779.34607 | -1.9852175 | 0.3599963  | -5.5145496 | 3.4967E-08 | 2.7193E-06 |

**Table S4 Significant sense expression changes in *brr6-1* versus wild type (glucose)**

Sense expression changes

|           | baseMean   | log2FoldChar | lfcSE      | stat       | pvalue     | padj       |
|-----------|------------|--------------|------------|------------|------------|------------|
| YAL001C   | 5893.2594  | 0.92088946   | 0.14188842 | 6.490237   | 8.57E-11   | 2.84E-09   |
| YAL014C   | 1020.71151 | -0.7013954   | 0.17059568 | -4.1114486 | 3.93E-05   | 0.00029959 |
| YAL018C   | 27.7616856 | 1.32182797   | 0.36094006 | 3.66218135 | 0.00025008 | 0.00141935 |
| YAL020C   | 2010.17142 | -0.6956662   | 0.14796458 | -4.7015727 | 2.58E-06   | 2.98E-05   |
| YAL021C   | 478.276269 | 0.65661285   | 0.18762022 | 3.49969126 | 0.0004658  | 0.00239227 |
| YAL024C   | 216.184372 | 0.8031699    | 0.22433642 | 3.58020294 | 0.00034333 | 0.00184705 |
| YAL031C   | 607.758669 | 0.7994342    | 0.17055718 | 4.68719161 | 2.77E-06   | 3.18E-05   |
| YAL036C   | 6290.74302 | -0.8535298   | 0.12136554 | -7.0327195 | 2.03E-12   | 8.94E-11   |
| YAL038W   | 171059.171 | -1.2254446   | 0.16469304 | -7.4407791 | 1.00E-13   | 5.92E-12   |
| YAL043C   | 317.685334 | 1.07061383   | 0.19083397 | 5.61018464 | 2.02E-08   | 4.13E-07   |
| YAL044C   | 7256.87215 | -0.9371835   | 0.22627391 | -4.1418097 | 3.45E-05   | 0.00026766 |
| YAL059W   | 2958.10591 | -0.8930161   | 0.16093872 | -5.5487957 | 2.88E-08   | 5.67E-07   |
| YAL060W   | 8984.45734 | -1.2853528   | 0.19341437 | -6.6455912 | 3.02E-11   | 1.09E-09   |
| YAL062W   | 409.279571 | -0.7625375   | 0.17869452 | -4.2672686 | 1.98E-05   | 0.00016878 |
| YAL064W-B | 132.295848 | 0.73084901   | 0.24393308 | 2.99610453 | 0.00273453 | 0.01053338 |
| YAL067C   | 86.1569675 | 0.88085812   | 0.27832369 | 3.16486931 | 0.00155153 | 0.00657994 |
| YAR019C   | 82.404027  | 0.87812626   | 0.30145237 | 2.91298511 | 0.00357992 | 0.01302371 |
| YAR047C   | 60.2148321 | 1.63666839   | 0.31863475 | 5.13650317 | 2.80E-07   | 4.25E-06   |
| YAR071W   | 339.498177 | -2.6408746   | 0.20120413 | -13.12535  | 2.36E-39   | 1.30E-36   |
| YAR073W   | 80.0943444 | 1.1355582    | 0.28467564 | 3.98895464 | 6.64E-05   | 0.00046085 |
| YBL003C   | 7159.58934 | -0.6645546   | 0.14598855 | -4.5521008 | 5.31E-06   | 5.42E-05   |
| YBL006C   | 3111.93917 | -0.8961233   | 0.12762601 | -7.0214791 | 2.20E-12   | 9.62E-11   |
| YBL007C   | 4374.85675 | 0.69166023   | 0.12368139 | 5.59227418 | 2.24E-08   | 4.49E-07   |
| YBL024W   | 2027.74188 | -0.6204755   | 0.14544435 | -4.2660683 | 1.99E-05   | 0.00016898 |
| YBL027W   | 11412.2329 | -1.0545541   | 0.12543519 | -8.4071631 | 4.20E-17   | 4.06E-15   |
| YBL028C   | 1753.83649 | -0.6688102   | 0.14496482 | -4.6136033 | 3.96E-06   | 4.24E-05   |
| YBL032W   | 2217.27293 | -0.8729174   | 0.13460852 | -6.4848595 | 8.88E-11   | 2.92E-09   |
| YBL034C   | 358.079955 | 0.78688629   | 0.18746207 | 4.19757612 | 2.70E-05   | 0.00021675 |
| YBL039C   | 13634.5496 | -0.7193747   | 0.15348872 | -4.6868249 | 2.77E-06   | 3.18E-05   |
| YBL041W   | 3088.14195 | -0.7713077   | 0.16024705 | -4.8132412 | 1.49E-06   | 1.86E-05   |
| YBL042C   | 5282.91324 | -0.6641019   | 0.1736503  | -3.8243638 | 0.00013111 | 0.00082656 |
| YBL050W   | 2580.62245 | -0.6842404   | 0.1737967  | -3.9370162 | 8.25E-05   | 0.00055702 |
| YBL051C   | 244.825599 | 0.8390607    | 0.21268255 | 3.94513192 | 7.98E-05   | 0.00054209 |
| YBL055C   | 2418.95663 | -0.6497054   | 0.15834656 | -4.1030597 | 4.08E-05   | 0.00030827 |
| YBL063W   | 1537.95455 | 0.60041352   | 0.15736658 | 3.81538132 | 0.00013597 | 0.00085281 |
| YBL066C   | 103.213661 | 0.90289387   | 0.27850469 | 3.24193416 | 0.00118721 | 0.00522786 |
| YBL068W   | 1767.10828 | -0.9789773   | 0.16149916 | -6.0618107 | 1.35E-09   | 3.54E-08   |
| YBL069W   | 1789.48868 | -0.6349702   | 0.14273108 | -4.4487173 | 8.64E-06   | 8.36E-05   |
| YBL072C   | 9601.68474 | -0.8705915   | 0.12066213 | -7.2151173 | 5.39E-13   | 2.71E-11   |
| YBL081W   | 39.6365169 | 1.09793122   | 0.34877091 | 3.14800117 | 0.00164391 | 0.0068807  |
| YBL085W   | 615.618144 | 0.6472531    | 0.16596208 | 3.90000596 | 9.62E-05   | 0.00063605 |
| YBL087C   | 19980.5956 | -0.6702798   | 0.11835471 | -5.6633133 | 1.48E-08   | 3.16E-07   |
| YBL088C   | 2796.1196  | 0.59267484   | 0.13774554 | 4.30267897 | 1.69E-05   | 0.00014808 |
| YBL091C   | 4222.97895 | -0.8135087   | 0.16034156 | -5.073599  | 3.90E-07   | 5.71E-06   |
| YBL097W   | 3650.01691 | 0.71048464   | 0.17495738 | 4.06090126 | 4.89E-05   | 0.00035483 |
| YBL101C   | 145.338975 | 1.06243768   | 0.26771938 | 3.96847506 | 7.23E-05   | 0.00049761 |
| YBL106C   | 1408.93358 | 0.8354046    | 0.14305544 | 5.83972606 | 5.23E-09   | 1.23E-07   |
| YBL113C   | 362.846778 | 1.24871113   | 0.18423098 | 6.77796489 | 1.22E-11   | 4.82E-10   |
| YBR010W   | 9190.47736 | -0.9929347   | 0.12938205 | -7.6744391 | 1.66E-14   | 1.12E-12   |
| YBR014C   | 1540.78971 | -0.606739    | 0.1728278  | -3.5106565 | 0.000447   | 0.00231877 |
| YBR030W   | 2412.39534 | -0.6033764   | 0.13111398 | -4.6019227 | 4.19E-06   | 4.46E-05   |
| YBR033W   | 118.357712 | 0.83906552   | 0.26455114 | 3.17165713 | 0.00151572 | 0.00644604 |
| YBR034C   | 935.193399 | -0.6355772   | 0.15297609 | -4.1547487 | 3.26E-05   | 0.00025524 |
| YBR040W   | 31.9953625 | 1.39855045   | 0.35473    | 3.94257729 | 8.06E-05   | 0.00054717 |
| YBR045C   | 454.477476 | 0.96599863   | 0.20548407 | 4.7010876  | 2.59E-06   | 2.98E-05   |
| YBR048W   | 4820.46494 | -0.5893358   | 0.15274709 | -3.8582458 | 0.0001142  | 0.00073443 |
| YBR052C   | 1676.41908 | -0.6245138   | 0.15116259 | -4.1314046 | 3.61E-05   | 0.00027865 |
| YBR054W   | 2874.0151  | -1.1503715   | 0.16071475 | -7.1578467 | 8.20E-13   | 3.93E-11   |
| YBR059C   | 973.779999 | 0.59238273   | 0.14980098 | 3.95446502 | 7.67E-05   | 0.0005239  |
| YBR068C   | 9785.09748 | -0.7119858   | 0.19212761 | -3.7057965 | 0.00021073 | 0.00122689 |
| YBR069C   | 12315.6826 | -0.7776145   | 0.15700497 | -4.9528015 | 7.32E-07   | 9.92E-06   |
| YBR076W   | 18.6142143 | 1.25305393   | 0.37169526 | 3.37118621 | 0.00074845 | 0.003561   |



|           |            |            |            |            |            |            |
|-----------|------------|------------|------------|------------|------------|------------|
| YBR081C   | 5132.08423 | 0.61295871 | 0.14280813 | 4.29218364 | 1.77E-05   | 0.00015392 |
| YBR084C-A | 5356.25273 | -0.5859804 | 0.13013335 | -4.5029226 | 6.70E-06   | 6.64E-05   |
| YBR086C   | 619.62559  | 0.64903918 | 0.16757914 | 3.87303093 | 0.00010749 | 0.00069788 |
| YBR087W   | 2224.49398 | -0.9627189 | 0.13836766 | -6.9576876 | 3.46E-12   | 1.49E-10   |
| YBR088C   | 726.411271 | -0.7631393 | 0.15293892 | -4.9898304 | 6.04E-07   | 8.40E-06   |
| YBR089C-A | 1102.54996 | -1.1156222 | 0.14620536 | -7.6305155 | 2.34E-14   | 1.56E-12   |
| YBR093C   | 422.781597 | -1.9893684 | 0.18439024 | -10.788903 | 3.88E-27   | 9.86E-25   |
| YBR101C   | 2561.27768 | -0.7336582 | 0.14722954 | -4.9830912 | 6.26E-07   | 8.66E-06   |
| YBR106W   | 13552.0948 | -0.9440053 | 0.12858269 | -7.3416201 | 2.11E-13   | 1.18E-11   |
| YBR108W   | 100.970257 | 1.10508089 | 0.26548382 | 4.16251684 | 3.15E-05   | 0.00024874 |
| YBR110W   | 3321.54933 | -0.5961959 | 0.14242638 | -4.1859935 | 2.84E-05   | 0.00022691 |
| YBR112C   | 142.286086 | 0.90720519 | 0.26609811 | 3.40928833 | 0.00065133 | 0.00316819 |
| YBR113W   | 22.6878972 | 1.09700449 | 0.36884346 | 2.97417365 | 0.00293779 | 0.01114712 |
| YBR117C   | 60.9026752 | 1.14030004 | 0.34086245 | 3.34533778 | 0.00082182 | 0.00383812 |
| YBR118W   | 40239.3465 | -0.8699753 | 0.12217865 | -7.1205181 | 1.08E-12   | 5.08E-11   |
| YBR122C   | 1454.1455  | -0.7107156 | 0.16503759 | -4.3063862 | 1.66E-05   | 0.00014604 |
| YBR126W-A | 61.5508509 | -0.9099539 | 0.3104148  | -2.9314126 | 0.00337424 | 0.01243894 |
| YBR132C   | 197.02195  | 0.77083939 | 0.22558074 | 3.41713305 | 0.00063284 | 0.00309063 |
| YBR141C   | 866.681398 | -0.7912385 | 0.17345678 | -4.5615888 | 5.08E-06   | 5.21E-05   |
| YBR146W   | 475.133362 | -0.6338017 | 0.19660379 | -3.2237511 | 0.00126523 | 0.00551558 |
| YBR148W   | 435.931061 | 1.2336551  | 0.2703385  | 4.56337181 | 5.03E-06   | 5.18E-05   |
| YBR154C   | 4644.92767 | -0.9393161 | 0.12960759 | -7.2473847 | 4.25E-13   | 2.21E-11   |
| YBR155W   | 500.255526 | -0.6378495 | 0.2167816  | -2.9423599 | 0.00325721 | 0.01210276 |
| YBR156C   | 80.1173153 | 1.26465753 | 0.28756782 | 4.39777138 | 1.09E-05   | 0.00010231 |
| YBR161W   | 583.013668 | -0.7397294 | 0.17249457 | -4.2884215 | 1.80E-05   | 0.00015589 |
| YBR165W   | 614.104318 | -0.6170632 | 0.16171013 | -3.8158595 | 0.00013571 | 0.00085281 |
| YBR175W   | 1567.31886 | -0.6750729 | 0.138001   | -4.8917971 | 9.99E-07   | 1.33E-05   |
| YBR176W   | 1255.21195 | -0.6168083 | 0.14628955 | -4.2163527 | 2.48E-05   | 0.00020296 |
| YBR180W   | 56.7955348 | 1.07256031 | 0.31743721 | 3.37881095 | 0.000728   | 0.00347232 |
| YBR181C   | 21638.7224 | -1.0376999 | 0.12753908 | -8.1363287 | 4.07E-16   | 3.31E-14   |
| YBR186W   | 67.2186068 | 1.20107944 | 0.31478316 | 3.81557715 | 0.00013586 | 0.00085281 |
| YBR189W   | 12951.8315 | -1.0970188 | 0.12004925 | -9.138073  | 6.36E-20   | 8.60E-18   |
| YBR191W   | 9572.36571 | -1.0509181 | 0.12377526 | -8.4905343 | 2.06E-17   | 2.05E-15   |
| YBR191W-A | 283.677216 | -0.919311  | 0.21192544 | -4.3378982 | 1.44E-05   | 0.00013037 |
| YBR203W   | 720.899209 | 0.8306048  | 0.17092401 | 4.85949753 | 1.18E-06   | 1.54E-05   |
| YBR207W   | 4348.36443 | -0.5810763 | 0.12694497 | -4.5773873 | 4.71E-06   | 4.93E-05   |
| YBR212W   | 89.8025166 | 1.3194136  | 0.27769432 | 4.75131653 | 2.02E-06   | 2.43E-05   |
| YBR214W   | 50.6084138 | 1.11788291 | 0.33497725 | 3.33719057 | 0.0008463  | 0.00393132 |
| YBR215W   | 136.394143 | 0.78035313 | 0.24493928 | 3.18590438 | 0.00144302 | 0.00618003 |
| YBR222C   | 371.994236 | 0.66398865 | 0.20943353 | 3.17040287 | 0.00152228 | 0.00646941 |
| YBR225W   | 210.554583 | 0.77465419 | 0.2179329  | 3.55455362 | 0.00037862 | 0.00201733 |
| YBR232C   | 20.3889495 | 1.11205187 | 0.3695005  | 3.0096086  | 0.00261585 | 0.0101339  |
| YBR238C   | 119.742726 | 0.81328018 | 0.26205666 | 3.10345164 | 0.00191277 | 0.00776687 |
| YBR247C   | 4447.01094 | -0.7287221 | 0.1249342  | -5.8328469 | 5.45E-09   | 1.27E-07   |
| YBR261C   | 1149.84197 | -0.6765951 | 0.15457542 | -4.3771194 | 1.20E-05   | 0.00011097 |
| YBR263W   | 5862.40008 | -0.8633749 | 0.13417689 | -6.4346019 | 1.24E-10   | 3.97E-09   |
| YBR271W   | 2486.74732 | -0.6847224 | 0.1320534  | -5.1851932 | 2.16E-07   | 3.37E-06   |
| YBR275C   | 5282.36327 | 0.68254599 | 0.12842315 | 5.31482039 | 1.07E-07   | 1.82E-06   |
| YBR283C   | 10868.5169 | -0.7840642 | 0.16044702 | -4.8867483 | 1.03E-06   | 1.35E-05   |
| YBR284W   | 216.126251 | 1.07088663 | 0.2123879  | 5.04212644 | 4.60E-07   | 6.61E-06   |
| YBR291C   | 2746.75247 | -0.9509166 | 0.17326127 | -5.4883389 | 4.06E-08   | 7.67E-07   |
| YBR294W   | 110.876932 | 1.42601256 | 0.27829929 | 5.12402513 | 2.99E-07   | 4.49E-06   |
| YBR296C   | 430.414059 | -2.4771935 | 0.27049978 | -9.1578392 | 5.29E-20   | 7.33E-18   |
| YCL001W   | 2336.15674 | 0.83440637 | 0.16268411 | 5.12899732 | 2.91E-07   | 4.39E-06   |
| YCL001W-A | 34.3333648 | 1.2327289  | 0.34800592 | 3.54226416 | 0.00039671 | 0.00209536 |
| YCL002C   | 1423.32546 | 0.68603954 | 0.15090054 | 4.54630267 | 5.46E-06   | 5.53E-05   |
| YCL004W   | 164.090299 | 1.42756184 | 0.25247288 | 5.65431761 | 1.56E-08   | 3.30E-07   |
| YCL005W   | 360.45053  | 1.06246484 | 0.18608989 | 5.70941721 | 1.13E-08   | 2.51E-07   |
| YCL005W-A | 1022.45275 | 0.89764736 | 0.20065487 | 4.47358867 | 7.69E-06   | 7.54E-05   |
| YCL008C   | 69.6180077 | 1.39331628 | 0.30028082 | 4.64004415 | 3.48E-06   | 3.84E-05   |
| YCL009C   | 2382.35847 | 0.61167665 | 0.19991633 | 3.05966322 | 0.00221586 | 0.00880273 |
| YCL010C   | 5608.04772 | 0.86986732 | 0.15658827 | 5.55512426 | 2.77E-08   | 5.52E-07   |
| YCL011C   | 18686.1035 | 0.71467577 | 0.15009593 | 4.76145994 | 1.92E-06   | 2.32E-05   |
| YCL012C   | 52.664945  | 1.56069592 | 0.32185677 | 4.8490387  | 1.24E-06   | 1.61E-05   |
| YCL014W   | 2519.11556 | 1.42929279 | 0.13521403 | 10.5705954 | 4.08E-26   | 9.55E-24   |

|           |            |            |            |            |            |            |
|-----------|------------|------------|------------|------------|------------|------------|
| YCL016C   | 860.064712 | 0.58614968 | 0.14855927 | 3.94556107 | 7.96E-05   | 0.00054173 |
| YCL017C   | 4901.12629 | 1.03163524 | 0.14564893 | 7.08302671 | 1.41E-12   | 6.46E-11   |
| YCL018W   | 16889.9821 | 2.12003133 | 0.17884746 | 11.853852  | 2.06E-32   | 8.94E-30   |
| YCL022C   | 20.3292817 | 1.2971032  | 0.37066363 | 3.49940785 | 0.00046629 | 0.00239235 |
| YCL023C   | 15.7083534 | 1.46944355 | 0.36460213 | 4.03026599 | 5.57E-05   | 0.00039637 |
| YCL024W   | 2935.85335 | 1.22376176 | 0.13411434 | 9.12476466 | 7.19E-20   | 9.52E-18   |
| YCL025C   | 4054.2587  | 0.61853355 | 0.17103724 | 3.61636771 | 0.00029877 | 0.00165257 |
| YCL026C-A | 37.4845544 | 1.77191501 | 0.34891112 | 5.07841376 | 3.81E-07   | 5.59E-06   |
| YCL027W   | 196.530829 | 2.17569756 | 0.22853523 | 9.52018438 | 1.73E-21   | 3.01E-19   |
| YCL029C   | 462.974596 | 1.42361192 | 0.17184727 | 8.28416974 | 1.19E-16   | 1.05E-14   |
| YCL032W   | 1205.22869 | 0.89494102 | 0.14929027 | 5.99463713 | 2.04E-09   | 5.22E-08   |
| YCL033C   | 1085.08027 | 0.64816046 | 0.20160215 | 3.21504742 | 0.00130423 | 0.00566531 |
| YCL034W   | 6356.45499 | 0.99418076 | 0.12822148 | 7.75362089 | 8.93E-15   | 6.47E-13   |
| YCL035C   | 543.625442 | 1.09958792 | 0.22773486 | 4.82836895 | 1.38E-06   | 1.75E-05   |
| YCL037C   | 273.104773 | 1.21778227 | 0.22267452 | 5.46888931 | 4.53E-08   | 8.46E-07   |
| YCL038C   | 1748.5692  | 1.00953864 | 0.14955159 | 6.75043737 | 1.47E-11   | 5.68E-10   |
| YCL039W   | 432.76817  | 1.11879842 | 0.18928567 | 5.9106345  | 3.41E-09   | 8.34E-08   |
| YCL041C   | 44.9731947 | 1.73411035 | 0.33840901 | 5.12430318 | 2.99E-07   | 4.49E-06   |
| YCL043C   | 1395.60943 | 1.00751194 | 0.15583261 | 6.46534706 | 1.01E-10   | 3.29E-09   |
| YCL044C   | 66.6481881 | 1.8668505  | 0.32381667 | 5.76514645 | 8.16E-09   | 1.86E-07   |
| YCL045C   | 1494.74903 | 1.22815112 | 0.16447781 | 7.46697151 | 8.21E-14   | 5.05E-12   |
| YCL048W   | 112.184436 | 1.79695975 | 0.27005275 | 6.65410658 | 2.85E-11   | 1.04E-09   |
| YCL049C   | 1367.61825 | 0.87305925 | 0.1875757  | 4.65443674 | 3.25E-06   | 3.64E-05   |
| YCL050C   | 365.435665 | 1.33439855 | 0.19722103 | 6.76600532 | 1.32E-11   | 5.17E-10   |
| YCL051W   | 291.702132 | 1.04989593 | 0.20162611 | 5.20714257 | 1.92E-07   | 3.02E-06   |
| YCL052C   | 2811.75955 | 0.70076376 | 0.14141892 | 4.95523333 | 7.22E-07   | 9.82E-06   |
| YCL054W   | 20311.5633 | 1.20200239 | 0.14729731 | 8.16038239 | 3.34E-16   | 2.79E-14   |
| YCL056C   | 244.986467 | 1.1576421  | 0.21172984 | 5.46754348 | 4.56E-08   | 8.48E-07   |
| YCL057C-A | 90.1834947 | 1.1939597  | 0.27985435 | 4.26636102 | 1.99E-05   | 0.00016898 |
| YCL057W   | 3551.19252 | 0.71164118 | 0.15339019 | 4.63941787 | 3.49E-06   | 3.84E-05   |
| YCL058C   | 44.9787297 | 1.46447733 | 0.33497824 | 4.37185814 | 1.23E-05   | 0.00011299 |
| YCL058W-A | 535.131081 | 0.91285295 | 0.1808175  | 5.04847666 | 4.45E-07   | 6.46E-06   |
| YCL061C   | 5272.98623 | 1.72040808 | 0.1272301  | 13.5220214 | 1.16E-41   | 7.06E-39   |
| YCL063W   | 852.126563 | 0.97409055 | 0.18850922 | 5.16733634 | 2.37E-07   | 3.66E-06   |
| YCL073C   | 18.7088536 | 1.38574759 | 0.36968544 | 3.74845057 | 0.00017793 | 0.00106131 |
| YCL076W   | 17.1446186 | 1.30443228 | 0.37150806 | 3.5111816  | 0.00044612 | 0.00231815 |
| YCR002C   | 709.359339 | 0.59151273 | 0.16148083 | 3.66305238 | 0.00024923 | 0.00141585 |
| YCR005C   | 13256.6407 | -0.5907603 | 0.17479258 | -3.3797792 | 0.00072544 | 0.00346505 |
| YCR006C   | 378.207894 | 0.91534971 | 0.20885436 | 4.38271782 | 1.17E-05   | 0.00010848 |
| YCR007C   | 238.784468 | 0.69417463 | 0.23583293 | 2.94350172 | 0.00324522 | 0.01207293 |
| YCR008W   | 3405.80073 | 0.62601127 | 0.13706822 | 4.5671511  | 4.94E-06   | 5.13E-05   |
| YCR010C   | 112.394282 | 1.61786313 | 0.29301493 | 5.5214358  | 3.36E-08   | 6.52E-07   |
| YCR011C   | 22865.0041 | 0.66183285 | 0.13120532 | 5.04425338 | 4.55E-07   | 6.56E-06   |
| YCR014C   | 3275.11609 | 1.27555517 | 0.15118991 | 8.43677468 | 3.26E-17   | 3.20E-15   |
| YCR015C   | 1947.15152 | 0.86348285 | 0.13184907 | 6.54902519 | 5.79E-11   | 1.98E-09   |
| YCR016W   | 2248.84767 | 0.62315603 | 0.14380163 | 4.33344208 | 1.47E-05   | 0.00013217 |
| YCR017C   | 10332.0659 | 0.96950547 | 0.13283097 | 7.29879061 | 2.90E-13   | 1.58E-11   |
| YCR019W   | 652.400735 | 0.77233782 | 0.19101993 | 4.04323169 | 5.27E-05   | 0.00037889 |
| YCR020C   | 151.709266 | 1.064874   | 0.24222407 | 4.39623525 | 1.10E-05   | 0.00010272 |
| YCR020C-A | 861.35622  | 1.22136069 | 0.19695692 | 6.20115649 | 5.60E-10   | 1.59E-08   |
| YCR021C   | 198.525094 | 1.8846934  | 0.25023852 | 7.53158793 | 5.01E-14   | 3.21E-12   |
| YCR022C   | 11.6474066 | 1.22748406 | 0.36275726 | 3.38376155 | 0.000715   | 0.00343133 |
| YCR023C   | 2219.37431 | 0.81920667 | 0.16240414 | 5.04424757 | 4.55E-07   | 6.56E-06   |
| YCR024C   | 159.449958 | 1.45431037 | 0.23346014 | 6.22937327 | 4.68E-10   | 1.35E-08   |
| YCR024C-A | 899.932628 | 1.24339368 | 0.17651047 | 7.04430548 | 1.86E-12   | 8.29E-11   |
| YCR024C-B | 1563.81003 | 1.31592564 | 0.14661907 | 8.9751332  | 2.83E-19   | 3.45E-17   |
| YCR025C   | 59.8964667 | 1.29465019 | 0.31795801 | 4.07176469 | 4.67E-05   | 0.00034473 |
| YCR026C   | 6311.213   | 0.92631196 | 0.13809418 | 6.70782745 | 1.98E-11   | 7.34E-10   |
| YCR028C-A | 189.907458 | 1.22290114 | 0.2231326  | 5.4806028  | 4.24E-08   | 7.97E-07   |
| YCR030C   | 238.123361 | 1.3810039  | 0.21123497 | 6.5377617  | 6.24E-11   | 2.11E-09   |
| YCR031C   | 2134.16086 | 0.84825818 | 0.19513603 | 4.34700948 | 1.38E-05   | 0.00012563 |
| YCR032W   | 9911.52266 | 1.5411836  | 0.13788516 | 11.1772984 | 5.27E-29   | 1.69E-26   |
| YCR033W   | 1914.57785 | 1.20210801 | 0.13732422 | 8.75379424 | 2.06E-18   | 2.24E-16   |
| YCR034W   | 873.457033 | 1.37557275 | 0.15136467 | 9.08780572 | 1.01E-19   | 1.28E-17   |
| YCR036W   | 2381.15767 | 0.6945602  | 0.17219205 | 4.0336368  | 5.49E-05   | 0.00039302 |
| YCR037C   | 6704.47101 | 0.80354149 | 0.12145224 | 6.61611073 | 3.69E-11   | 1.31E-09   |

|           |            |            |            |            |            |            |
|-----------|------------|------------|------------|------------|------------|------------|
| YCR038W-A | 17.9310626 | 1.26508839 | 0.37165824 | 3.40390239 | 0.0006643  | 0.00322103 |
| YCR042C   | 12084.5959 | 1.41010766 | 0.13231511 | 10.6571926 | 1.61E-26   | 3.93E-24   |
| YCR043C   | 1145.89491 | 1.2052513  | 0.15294597 | 7.88024251 | 3.27E-15   | 2.43E-13   |
| YCR045C   | 71.0479405 | 1.60619103 | 0.33976084 | 4.72741653 | 2.27E-06   | 2.67E-05   |
| YCR045W-A | 168.584589 | 0.78004804 | 0.23443026 | 3.32742044 | 0.00087654 | 0.00403182 |
| YCR048W   | 1811.88037 | 0.82075877 | 0.15019142 | 5.46475134 | 4.64E-08   | 8.55E-07   |
| YCR052W   | 535.832776 | 0.70085733 | 0.17334829 | 4.04305872 | 5.28E-05   | 0.00037889 |
| YCR053W   | 2347.67362 | 1.17053005 | 0.15853655 | 7.38334523 | 1.54E-13   | 8.87E-12   |
| YCR054C   | 808.361253 | 1.00286432 | 0.15533219 | 6.45625551 | 1.07E-10   | 3.48E-09   |
| YCR057C   | 16255.2401 | 0.76863673 | 0.13822587 | 5.56073007 | 2.69E-08   | 5.36E-07   |
| YCR060W   | 276.961441 | 0.91339719 | 0.24066512 | 3.79530354 | 0.00014746 | 0.00091358 |
| YCR061W   | 189.338075 | 1.55926583 | 0.22998278 | 6.77992428 | 1.20E-11   | 4.79E-10   |
| YCR063W   | 44.7657198 | 1.06708648 | 0.34151629 | 3.12455513 | 0.00178074 | 0.00737234 |
| YCR064C   | 81.305856  | 1.27817596 | 0.32790088 | 3.89805587 | 9.70E-05   | 0.00064049 |
| YCR065W   | 212.462572 | 1.52842329 | 0.23036507 | 6.63478747 | 3.25E-11   | 1.16E-09   |
| YCR066W   | 313.392495 | 1.06009858 | 0.19124322 | 5.54319552 | 2.97E-08   | 5.83E-07   |
| YCR067C   | 811.600845 | 1.76246591 | 0.17323819 | 10.1736572 | 2.60E-24   | 5.28E-22   |
| YCR068W   | 470.693308 | 1.26202877 | 0.17193046 | 7.34034424 | 2.13E-13   | 1.18E-11   |
| YCR069W   | 607.267077 | 1.19243958 | 0.18043269 | 6.60877807 | 3.88E-11   | 1.36E-09   |
| YCR071C   | 197.205501 | 0.83141247 | 0.21546897 | 3.85861805 | 0.00011403 | 0.00073408 |
| YCR073C   | 4610.03365 | 1.49947148 | 0.1347324  | 11.1292565 | 9.04E-29   | 2.75E-26   |
| YCR076C   | 1396.94249 | 0.73389342 | 0.17291587 | 4.2442224  | 2.19E-05   | 0.00018225 |
| YCR077C   | 1746.56768 | 1.10903254 | 0.1399969  | 7.92183659 | 2.34E-15   | 1.76E-13   |
| YCR079W   | 1309.07635 | 1.24593139 | 0.14415276 | 8.6431322  | 5.47E-18   | 5.74E-16   |
| YCR081C-A | 13.7368001 | 1.16015142 | 0.37010243 | 3.13467656 | 0.00172044 | 0.00716653 |
| YCR081W   | 1045.91746 | 1.2521775  | 0.15722766 | 7.9641045  | 1.66E-15   | 1.27E-13   |
| YCR082W   | 881.02282  | 0.85381071 | 0.14994117 | 5.69430449 | 1.24E-08   | 2.69E-07   |
| YCR084C   | 458.299148 | 1.30011252 | 0.1793914  | 7.24735133 | 4.25E-13   | 2.21E-11   |
| YCR085W   | 13.1057586 | 1.21978409 | 0.36793246 | 3.31523916 | 0.00091565 | 0.0041927  |
| YCR086W   | 73.4427842 | 1.26776947 | 0.3114759  | 4.07020082 | 4.70E-05   | 0.00034549 |
| YCR087C-A | 708.784108 | 0.994268   | 0.16503725 | 6.02450656 | 1.70E-09   | 4.38E-08   |
| YCR088W   | 489.940977 | 1.89390591 | 0.17362738 | 10.9078759 | 1.06E-27   | 2.80E-25   |
| YCR089W   | 107.447203 | 1.9240289  | 0.31104007 | 6.18579107 | 6.18E-10   | 1.71E-08   |
| YCR091W   | 111.074811 | 1.9983364  | 0.29720932 | 6.72366659 | 1.77E-11   | 6.74E-10   |
| YCR092C   | 2041.4167  | 0.88354723 | 0.14278044 | 6.18815325 | 6.09E-10   | 1.69E-08   |
| YCR093W   | 2328.79421 | 1.49412361 | 0.13474027 | 11.0889162 | 1.42E-28   | 4.12E-26   |
| YCR097W-A | 16.6549779 | 1.22424831 | 0.37053584 | 3.30399435 | 0.00095318 | 0.00433845 |
| YCR098C   | 439.502425 | 1.0730194  | 0.17422003 | 6.15898969 | 7.32E-10   | 1.97E-08   |
| YCR099C   | 387.580334 | 1.52051124 | 0.20620796 | 7.37367881 | 1.66E-13   | 9.36E-12   |
| YCR100C   | 642.161759 | 1.33605455 | 0.17935427 | 7.44924881 | 9.39E-14   | 5.66E-12   |
| YCR101C   | 367.779698 | 1.30560238 | 0.21851259 | 5.97495275 | 2.30E-09   | 5.74E-08   |
| YCR102C   | 193.568571 | 0.85811355 | 0.21607681 | 3.97133559 | 7.15E-05   | 0.00049237 |
| YCR102W-A | 26.5103403 | 1.37353993 | 0.36183692 | 3.79601926 | 0.00014704 | 0.00091281 |
| YCR105W   | 128.190831 | 1.68663027 | 0.2637139  | 6.39568217 | 1.60E-10   | 4.99E-09   |
| YCR106W   | 2981.73552 | 1.02190738 | 0.15972993 | 6.39771991 | 1.58E-10   | 4.95E-09   |
| YCR107W   | 1165.97688 | 0.9091226  | 0.15830989 | 5.74267709 | 9.32E-09   | 2.09E-07   |
| YDL020C   | 1722.48554 | 0.64171563 | 0.20702988 | 3.09962806 | 0.00193764 | 0.00784067 |
| YDL043C   | 698.803736 | -0.6148251 | 0.17376753 | -3.5382049 | 0.00040286 | 0.00212232 |
| YDL051W   | 1314.63928 | -0.9173613 | 0.15182032 | -6.042414  | 1.52E-09   | 3.97E-08   |
| YDL053C   | 2096.35063 | -0.6673267 | 0.16476149 | -4.0502591 | 5.12E-05   | 0.00036916 |
| YDL054C   | 294.864786 | 0.77410717 | 0.25759708 | 3.00510851 | 0.00265486 | 0.01026546 |
| YDL055C   | 62424.8251 | -0.6019993 | 0.17255191 | -3.4888008 | 0.00048519 | 0.00248304 |
| YDL058W   | 6021.43955 | 0.81314891 | 0.16295183 | 4.99011832 | 6.03E-07   | 8.40E-06   |
| YDL063C   | 984.557949 | -0.6824686 | 0.14782933 | -4.6165981 | 3.90E-06   | 4.20E-05   |
| YDL066W   | 11167.2934 | -1.6730003 | 0.18616958 | -8.9864325 | 2.55E-19   | 3.17E-17   |
| YDL079C   | 303.452768 | 0.5845857  | 0.19456048 | 3.00464765 | 0.00265889 | 0.01027451 |
| YDL082W   | 6495.62844 | -0.7829223 | 0.13079626 | -5.9858157 | 2.15E-09   | 5.42E-08   |
| YDL085C-A | 1073.25635 | -0.6906963 | 0.14359446 | -4.8100482 | 1.51E-06   | 1.89E-05   |
| YDL085W   | 114.362507 | 1.08089042 | 0.31024255 | 3.48401726 | 0.00049395 | 0.00252149 |
| YDL092W   | 1395.09511 | -0.6791084 | 0.16111869 | -4.2149575 | 2.50E-05   | 0.0002034  |
| YDL111C   | 1017.11264 | -0.6388375 | 0.17303402 | -3.6919764 | 0.00022252 | 0.00128085 |
| YDL129W   | 971.43725  | -0.8488201 | 0.18158751 | -4.674441  | 2.95E-06   | 3.35E-05   |
| YDL134C   | 2971.91678 | -0.592561  | 0.12760496 | -4.6437144 | 3.42E-06   | 3.78E-05   |
| YDL136W   | 1673.84776 | -0.7015358 | 0.14084504 | -4.9809053 | 6.33E-07   | 8.74E-06   |
| YDL140C   | 2297.82495 | 0.64510942 | 0.14027973 | 4.59873589 | 4.25E-06   | 4.52E-05   |

|         |            |            |            |            |            |            |
|---------|------------|------------|------------|------------|------------|------------|
| YDL144C | 2071.41854 | -0.7718401 | 0.143841   | -5.3659257 | 8.05E-08   | 1.40E-06   |
| YDL154W | 853.411194 | 0.606722   | 0.18834209 | 3.2213829  | 0.00127574 | 0.00555399 |
| YDL160C | 772.794162 | 0.75081084 | 0.16239378 | 4.62339652 | 3.78E-06   | 4.08E-05   |
| YDL161W | 514.568484 | 0.87600199 | 0.16648986 | 5.26159362 | 1.43E-07   | 2.35E-06   |
| YDL165W | 1769.70807 | -0.630323  | 0.15116213 | -4.1698474 | 3.05E-05   | 0.0002417  |
| YDL174C | 1381.63143 | -0.7442511 | 0.18486273 | -4.0259661 | 5.67E-05   | 0.00040191 |
| YDL192W | 12167.3253 | -0.7396625 | 0.12345538 | -5.991335  | 2.08E-09   | 5.30E-08   |
| YDL197C | 681.984003 | 0.64788027 | 0.16415985 | 3.94664276 | 7.93E-05   | 0.00053989 |
| YDL205C | 5137.9889  | -0.9432451 | 0.13494849 | -6.9896679 | 2.76E-12   | 1.20E-10   |
| YDL208W | 4897.79651 | -0.9852062 | 0.1363276  | -7.2267556 | 4.95E-13   | 2.55E-11   |
| YDL210W | 129.948643 | 0.76516136 | 0.26225972 | 2.91757105 | 0.00352769 | 0.01289401 |
| YDL214C | 75.0797584 | 0.94428506 | 0.29930081 | 3.15496993 | 0.00160515 | 0.00676026 |
| YDL219W | 1411.56394 | -0.6359496 | 0.14059524 | -4.5232656 | 6.09E-06   | 6.11E-05   |
| YDL224C | 137.129767 | 0.93722986 | 0.24281487 | 3.85985362 | 0.00011345 | 0.0007327  |
| YDL227C | 4339.88805 | -0.8320967 | 0.12668119 | -6.5684313 | 5.08E-11   | 1.76E-09   |
| YDL229W | 46552.3953 | -0.6611193 | 0.14809502 | -4.4641566 | 8.04E-06   | 7.85E-05   |
| YDL235C | 905.71967  | -0.9263192 | 0.18455117 | -5.0193083 | 5.19E-07   | 7.36E-06   |
| YDL236W | 6321.00604 | -0.8349314 | 0.13503048 | -6.1832811 | 6.28E-10   | 1.72E-08   |
| YDL238C | 1144.91131 | 0.77819334 | 0.14822331 | 5.25014146 | 1.52E-07   | 2.48E-06   |
| YDL239C | 1496.76427 | 0.96749084 | 0.14421206 | 6.7088069  | 1.96E-11   | 7.33E-10   |
| YDR011W | 13693.517  | 0.74488064 | 0.12892686 | 5.77754447 | 7.58E-09   | 1.74E-07   |
| YDR021W | 908.611679 | -0.6305689 | 0.16793223 | -3.754901  | 0.00017341 | 0.00104046 |
| YDR024W | 166.104214 | -0.8955025 | 0.23023229 | -3.8895607 | 0.00010043 | 0.00066047 |
| YDR028C | 4421.49047 | 0.6473084  | 0.12485434 | 5.18450848 | 2.17E-07   | 3.37E-06   |
| YDR036C | 124.951896 | 0.86602718 | 0.24886728 | 3.47987567 | 0.00050165 | 0.00253951 |
| YDR044W | 483.25723  | 0.70257082 | 0.19530558 | 3.59729004 | 0.00032155 | 0.00175469 |
| YDR050C | 39957.6933 | -1.0037648 | 0.11777007 | -8.5230893 | 1.55E-17   | 1.58E-15   |
| YDR054C | 424.046985 | -0.7045089 | 0.19185282 | -3.6721324 | 0.00024054 | 0.00137576 |
| YDR063W | 255.819722 | -0.8308767 | 0.20314019 | -4.0901639 | 4.31E-05   | 0.0003233  |
| YDR069C | 302.415024 | 0.82655325 | 0.21365663 | 3.86860556 | 0.00010946 | 0.00070991 |
| YDR075W | 884.680506 | -0.7972822 | 0.16327256 | -4.8831366 | 1.04E-06   | 1.37E-05   |
| YDR077W | 454.566703 | 0.7137255  | 0.18490971 | 3.85985958 | 0.00011345 | 0.0007327  |
| YDR087C | 3760.67094 | -0.8541727 | 0.12724815 | -6.7126529 | 1.91E-11   | 7.23E-10   |
| YDR096W | 70.029217  | 1.03933132 | 0.2968691  | 3.5009751  | 0.00046356 | 0.00238637 |
| YDR098C | 1593.63588 | -0.6105462 | 0.13812551 | -4.4202278 | 9.86E-06   | 9.32E-05   |
| YDR101C | 6185.03926 | -0.8029433 | 0.13369495 | -6.0057866 | 1.90E-09   | 4.89E-08   |
| YDR119W | 10777.9274 | -0.7359353 | 0.12915281 | -5.6981749 | 1.21E-08   | 2.65E-07   |
| YDR140W | 836.48995  | -0.6231515 | 0.18726673 | -3.3276145 | 0.00087593 | 0.00403182 |
| YDR159W | 1986.47228 | 0.64275914 | 0.1436334  | 4.47499767 | 7.64E-06   | 7.51E-05   |
| YDR161W | 5850.87539 | -0.5952927 | 0.13158337 | -4.5240728 | 6.07E-06   | 6.11E-05   |
| YDR171W | 112.82871  | 1.22518791 | 0.2883008  | 4.24968608 | 2.14E-05   | 0.00017908 |
| YDR176W | 2133.6337  | 0.65164529 | 0.15309136 | 4.25657791 | 2.08E-05   | 0.00017533 |
| YDR200C | 403.786545 | 0.71025378 | 0.17666728 | 4.02029049 | 5.81E-05   | 0.00041019 |
| YDR209C | 8.53845452 | 0.97528882 | 0.33754104 | 2.88939328 | 0.00385986 | 0.01385183 |
| YDR212W | 22437.669  | -0.5882832 | 0.1246078  | -4.7210788 | 2.35E-06   | 2.73E-05   |
| YDR214W | 4179.81653 | -0.6366494 | 0.13594407 | -4.6831713 | 2.82E-06   | 3.23E-05   |
| YDR218C | 51.526616  | 1.00348204 | 0.32350476 | 3.10190808 | 0.00192278 | 0.00779608 |
| YDR223W | 198.553946 | 0.80259406 | 0.22444402 | 3.5759208  | 0.000349   | 0.0018759  |
| YDR226W | 11629.5789 | -0.8299142 | 0.13304456 | -6.2378661 | 4.44E-10   | 1.29E-08   |
| YDR228C | 411.230695 | 0.67835765 | 0.17664413 | 3.84025014 | 0.00012291 | 0.00078215 |
| YDR255C | 265.638172 | 0.60271069 | 0.20047145 | 3.00646651 | 0.00264303 | 0.01022622 |
| YDR262W | 575.61527  | -0.7179068 | 0.18130248 | -3.9597186 | 7.50E-05   | 0.00051404 |
| YDR264C | 16155.4734 | -0.7328631 | 0.12694052 | -5.7732795 | 7.77E-09   | 1.78E-07   |
| YDR265W | 1084.78574 | -0.8282584 | 0.14921518 | -5.5507651 | 2.84E-08   | 5.62E-07   |
| YDR270W | 2118.12595 | -1.2346672 | 0.17771226 | -6.9475632 | 3.72E-12   | 1.58E-10   |
| YDR280W | 2848.79644 | -0.7595055 | 0.13442817 | -5.6498981 | 1.61E-08   | 3.35E-07   |
| YDR281C | 150.516382 | -1.8779956 | 0.26590426 | -7.0626757 | 1.63E-12   | 7.31E-11   |
| YDR293C | 937.417971 | 0.7591738  | 0.16338192 | 4.62668928 | 3.72E-06   | 4.03E-05   |
| YDR294C | 5788.41477 | -0.5819301 | 0.14286285 | -4.073348  | 4.63E-05   | 0.00034334 |
| YDR300C | 3771.79477 | -0.7621357 | 0.13385529 | -5.6937288 | 1.24E-08   | 2.69E-07   |
| YDR312W | 1385.72252 | -0.5826191 | 0.1527872  | -3.8132716 | 0.00013714 | 0.00085924 |
| YDR317W | 312.924056 | 0.60514715 | 0.20411105 | 2.96479371 | 0.00302886 | 0.01142152 |
| YDR321W | 8524.17824 | -0.7259471 | 0.12603529 | -5.7598714 | 8.42E-09   | 1.91E-07   |
| YDR328C | 7272.63275 | -0.6293108 | 0.12592073 | -4.9976739 | 5.80E-07   | 8.12E-06   |
| YDR340W | 2549.55989 | -0.8236413 | 0.13111085 | -6.2820223 | 3.34E-10   | 1.00E-08   |
| YDR347W | 2935.79694 | -0.8189336 | 0.17683638 | -4.6310243 | 3.64E-06   | 3.96E-05   |

|           |            |            |            |            |            |            |
|-----------|------------|------------|------------|------------|------------|------------|
| YDR356W   | 2813.86019 | 0.80786828 | 0.13645501 | 5.92040017 | 3.21E-09   | 7.92E-08   |
| YDR359C   | 433.860502 | 0.62106904 | 0.17915362 | 3.46668428 | 0.00052692 | 0.00264328 |
| YDR361C   | 4593.24835 | -0.8053477 | 0.13464638 | -5.9812055 | 2.21E-09   | 5.55E-08   |
| YDR368W   | 2152.83169 | -0.8545835 | 0.14098774 | -6.0614029 | 1.35E-09   | 3.54E-08   |
| YDR380W   | 502.705345 | -0.8092511 | 0.24098412 | -3.3581097 | 0.00078477 | 0.00369913 |
| YDR382W   | 3799.8344  | -0.6183486 | 0.12588579 | -4.9119809 | 9.02E-07   | 1.20E-05   |
| YDR398W   | 6275.71978 | -0.6794656 | 0.13336801 | -5.094667  | 3.49E-07   | 5.15E-06   |
| YDR399W   | 5265.95705 | -0.6847955 | 0.21952642 | -3.1194217 | 0.00181206 | 0.00747155 |
| YDR402C   | 40.5514769 | 1.07843751 | 0.33935744 | 3.17788081 | 0.00148356 | 0.0063273  |
| YDR408C   | 3473.58728 | -0.6148846 | 0.20985797 | -2.9300036 | 0.00338958 | 0.01248793 |
| YDR427W   | 4158.38543 | -0.8139687 | 0.13019677 | -6.2518349 | 4.06E-10   | 1.19E-08   |
| YDR429C   | 18096.3536 | -0.6440842 | 0.12370019 | -5.2068167 | 1.92E-07   | 3.02E-06   |
| YDR447C   | 23098.591  | -1.0014159 | 0.12303694 | -8.1391478 | 3.98E-16   | 3.28E-14   |
| YDR466W   | 255.802587 | 0.75143647 | 0.19963678 | 3.7640181  | 0.0001672  | 0.00100838 |
| YDR481C   | 8229.77346 | -1.1623164 | 0.14343323 | -8.1035364 | 5.34E-16   | 4.28E-14   |
| YDR516C   | 3539.22064 | -0.6426202 | 0.13851942 | -4.6392064 | 3.50E-06   | 3.84E-05   |
| YDR522C   | 63.3798371 | 2.42140186 | 0.32382158 | 7.47758022 | 7.57E-14   | 4.70E-12   |
| YDR523C   | 134.154447 | 0.98347648 | 0.25143038 | 3.91152598 | 9.17E-05   | 0.00061043 |
| YDR527W   | 1324.34378 | -0.6778641 | 0.13961504 | -4.8552373 | 1.20E-06   | 1.56E-05   |
| YDR531W   | 4743.76124 | -0.6204242 | 0.16903417 | -3.6704072 | 0.00024216 | 0.00138218 |
| YDR533C   | 417.481095 | -0.7009449 | 0.2256236  | -3.1067001 | 0.00189188 | 0.00770158 |
| YDR535C   | 50.6267526 | 1.2883848  | 0.33710315 | 3.82193042 | 0.00013241 | 0.00083304 |
| YDR536W   | 50.2680942 | 1.43984552 | 0.35643426 | 4.03958226 | 5.35E-05   | 0.00038364 |
| YEL002C   | 1940.37317 | -0.674188  | 0.13859727 | -4.8643675 | 1.15E-06   | 1.50E-05   |
| YEL006W   | 789.049111 | -0.8049315 | 0.15216132 | -5.2899876 | 1.22E-07   | 2.07E-06   |
| YEL007W   | 91.0552428 | 0.85769791 | 0.2901765  | 2.95578006 | 0.00311879 | 0.01168109 |
| YEL010W   | 8.31805722 | 1.02065821 | 0.34985005 | 2.91741618 | 0.00352944 | 0.01289401 |
| YEL011W   | 1068.25384 | 0.59446259 | 0.15138547 | 3.92681415 | 8.61E-05   | 0.0005767  |
| YEL020W-A | 2500.2114  | -0.8623605 | 0.16660326 | -5.1761322 | 2.27E-07   | 3.50E-06   |
| YEL039C   | 221.143646 | 0.71039523 | 0.24398334 | 2.91165464 | 0.0035952  | 0.01305801 |
| YEL043W   | 190.517707 | 0.8095515  | 0.23444461 | 3.45306088 | 0.00055426 | 0.00275324 |
| YEL047C   | 1371.01036 | -0.9680028 | 0.15075395 | -6.4210777 | 1.35E-10   | 4.29E-09   |
| YEL051W   | 10376.1164 | -0.6499117 | 0.13069359 | -4.9727897 | 6.60E-07   | 9.07E-06   |
| YEL054C   | 7686.48195 | -0.9853998 | 0.13524991 | -7.2857706 | 3.20E-13   | 1.71E-11   |
| YEL065W   | 7438.2601  | -1.5731348 | 0.18974697 | -8.290698  | 1.13E-16   | 1.01E-14   |
| YEL069C   | 52.1753448 | 1.29780113 | 0.34424244 | 3.77002068 | 0.00016323 | 0.0009931  |
| YEL070W   | 33.2895321 | 1.24778251 | 0.35939964 | 3.47185246 | 0.00051688 | 0.0026058  |
| YEL071W   | 41391.012  | -1.4277242 | 0.16715224 | -8.5414601 | 1.33E-17   | 1.37E-15   |
| YEL074W   | 46.527176  | 1.53292006 | 0.3546119  | 4.3228105  | 1.54E-05   | 0.00013736 |
| YEL077C   | 438.326982 | 0.74389012 | 0.17486745 | 4.25402279 | 2.10E-05   | 0.00017661 |
| YER001W   | 3961.27512 | -0.7993368 | 0.12963319 | -6.1661435 | 7.00E-10   | 1.89E-08   |
| YER011W   | 73.5745077 | 1.8818731  | 0.33557887 | 5.60784144 | 2.05E-08   | 4.16E-07   |
| YER021W   | 11174.4532 | -0.5960691 | 0.12107156 | -4.9232793 | 8.51E-07   | 1.14E-05   |
| YER023W   | 7048.5059  | -1.0352134 | 0.1458724  | -7.096705  | 1.28E-12   | 5.94E-11   |
| YER032W   | 49.1415141 | 1.24610823 | 0.34179311 | 3.64579685 | 0.00026656 | 0.00149208 |
| YER033C   | 152.987309 | 0.96327849 | 0.23671353 | 4.06938508 | 4.71E-05   | 0.00034586 |
| YER037W   | 368.096848 | -0.9822935 | 0.18355225 | -5.3515744 | 8.72E-08   | 1.50E-06   |
| YER049W   | 16552.2634 | -0.6362584 | 0.12091882 | -5.2618638 | 1.43E-07   | 2.35E-06   |
| YER054C   | 125.921715 | 1.27304878 | 0.27558067 | 4.6195141  | 3.85E-06   | 4.15E-05   |
| YER056C   | 11302.3819 | -0.900912  | 0.18030982 | -4.9964666 | 5.84E-07   | 8.16E-06   |
| YER060W-A | 157.883881 | 1.0790242  | 0.26503335 | 4.07127705 | 4.68E-05   | 0.00034473 |
| YER062C   | 508.641838 | -1.3317297 | 0.26936311 | -4.9439944 | 7.65E-07   | 1.04E-05   |
| YER063W   | 1269.69297 | -0.6657836 | 0.1727073  | -3.8549826 | 0.00011574 | 0.00074272 |
| YER072W   | 447.155218 | -1.5068935 | 0.17996929 | -8.3730592 | 5.61E-17   | 5.34E-15   |
| YER073W   | 15908.9529 | -1.0056524 | 0.1856478  | -5.4169908 | 6.06E-08   | 1.09E-06   |
| YER085C   | 39.9469652 | 1.13268608 | 0.34022919 | 3.3291855  | 0.000871   | 0.00401242 |
| YER091C   | 10715.5321 | -0.8696596 | 0.17332023 | -5.0176464 | 5.23E-07   | 7.41E-06   |
| YER094C   | 8820.01123 | -0.6942055 | 0.12316623 | -5.6363297 | 1.74E-08   | 3.60E-07   |
| YER096W   | 205.96965  | 0.6866162  | 0.22023749 | 3.1176173  | 0.00182319 | 0.00749207 |
| YER099C   | 2410.9098  | -0.6452612 | 0.13959891 | -4.6222506 | 3.80E-06   | 4.10E-05   |
| YER102W   | 4244.1699  | -0.6226703 | 0.13324467 | -4.6731349 | 2.97E-06   | 3.36E-05   |
| YER106W   | 39.0842206 | 1.24924072 | 0.34026434 | 3.67138306 | 0.00024124 | 0.0013782  |
| YER107C   | 5201.15869 | -0.7069772 | 0.12488468 | -5.6610405 | 1.50E-08   | 3.19E-07   |
| YER115C   | 775.06794  | -0.5830959 | 0.15608967 | -3.7356467 | 0.00018723 | 0.00110597 |
| YER117W   | 33411.542  | -0.6388582 | 0.12092936 | -5.282904  | 1.27E-07   | 2.14E-06   |

|           |            |            |            |            |            |            |
|-----------|------------|------------|------------|------------|------------|------------|
| YER124C   | 4092.53966 | -0.7146148 | 0.14941579 | -4.7827261 | 1.73E-06   | 2.13E-05   |
| YER126C   | 4676.66705 | -0.8042935 | 0.13071957 | -6.1528165 | 7.61E-10   | 2.04E-08   |
| YER131W   | 5756.84141 | -1.1905258 | 0.12845692 | -9.2678989 | 1.90E-20   | 2.89E-18   |
| YER138W-A | 270.941538 | -0.8017455 | 0.19890584 | -4.0307791 | 5.56E-05   | 0.00039597 |
| YER145C   | 8173.05773 | -1.9451594 | 0.15191068 | -12.804626 | 1.54E-37   | 7.24E-35   |
| YER146W   | 1574.50342 | -0.7422943 | 0.13669277 | -5.4303845 | 5.62E-08   | 1.01E-06   |
| YER152C   | 3324.73151 | -0.6840193 | 0.13304146 | -5.1414    | 2.73E-07   | 4.17E-06   |
| YER156C   | 3543.40373 | -0.6230579 | 0.14649162 | -4.2531981 | 2.11E-05   | 0.00017702 |
| YER158C   | 27.3509143 | 1.07611756 | 0.36357875 | 2.95979219 | 0.00307847 | 0.0115799  |
| YER162C   | 1615.96834 | 0.64701341 | 0.13695906 | 4.72413729 | 2.31E-06   | 2.70E-05   |
| YER163C   | 1291.16619 | -0.610681  | 0.17607203 | -3.4683592 | 0.00052365 | 0.0026312  |
| YER177W   | 23822.7976 | -1.0358676 | 0.12513144 | -8.2782355 | 1.25E-16   | 1.09E-14   |
| YER180C   | 223.968173 | -0.8847357 | 0.20757503 | -4.2622453 | 2.02E-05   | 0.00017118 |
| YER185W   | 97.5094853 | 0.91745827 | 0.27089383 | 3.38678167 | 0.00070718 | 0.00339645 |
| YER186C   | 2217.48803 | -0.6692942 | 0.14123709 | -4.7387987 | 2.15E-06   | 2.55E-05   |
| YFL004W   | 10462.9636 | -0.7455661 | 0.14431083 | -5.1663901 | 2.39E-07   | 3.67E-06   |
| YFL005W   | 7384.00837 | -0.6557781 | 0.12404201 | -5.286742  | 1.25E-07   | 2.10E-06   |
| YFL008W   | 1560.20982 | 0.77689752 | 0.14707214 | 5.28242483 | 1.27E-07   | 2.14E-06   |
| YFL010C   | 3223.6902  | -0.8925303 | 0.17498182 | -5.1007032 | 3.38E-07   | 5.02E-06   |
| YFL011W   | 90.9718066 | 0.91940161 | 0.30150139 | 3.0494108  | 0.00229291 | 0.00904978 |
| YFL021C-A | 52.2249292 | 1.51102722 | 0.33926711 | 4.45379805 | 8.44E-06   | 8.18E-05   |
| YFL031W   | 60669.6242 | -1.450712  | 0.12325973 | -11.769553 | 5.60E-32   | 2.27E-29   |
| YFL038C   | 13735.898  | -0.9046259 | 0.12172106 | -7.4319589 | 1.07E-13   | 6.27E-12   |
| YFL040W   | 65.6036544 | 1.45112654 | 0.32577661 | 4.45436078 | 8.41E-06   | 8.17E-05   |
| YFL045C   | 18968.6083 | -0.7296398 | 0.12685117 | -5.7519362 | 8.82E-09   | 1.99E-07   |
| YFL052W   | 135.374791 | 1.53342596 | 0.273848   | 5.59955138 | 2.15E-08   | 4.33E-07   |
| YFL064C   | 57.7048384 | 1.65390768 | 0.33362143 | 4.9574383  | 7.14E-07   | 9.73E-06   |
| YFL065C   | 59.0420834 | 1.47455398 | 0.319772   | 4.61126674 | 4.00E-06   | 4.28E-05   |
| YFL066C   | 48.4129072 | 1.36266891 | 0.35099818 | 3.88226778 | 0.00010349 | 0.00067477 |
| YFR015C   | 702.498899 | 1.463372   | 0.25074542 | 5.83608665 | 5.34E-09   | 1.25E-07   |
| YFR016C   | 3304.78472 | 1.08174584 | 0.14030095 | 7.7101819  | 1.26E-14   | 8.79E-13   |
| YFR022W   | 201.547584 | 0.75538511 | 0.21565302 | 3.50278009 | 0.00046043 | 0.00237226 |
| YFR023W   | 54.4078239 | 1.1703172  | 0.32091827 | 3.64677652 | 0.00026555 | 0.00148914 |
| YFR029W   | 57.8659594 | 0.97494723 | 0.31193405 | 3.12549158 | 0.00177508 | 0.00735391 |
| YFR031C   | 4443.69453 | 0.62986632 | 0.13934149 | 4.52030707 | 6.17E-06   | 6.19E-05   |
| YFR031C-A | 23091.5485 | -1.1937028 | 0.11983078 | -9.9615707 | 2.24E-23   | 4.02E-21   |
| YFR041C   | 2267.61699 | -0.6401712 | 0.16487164 | -3.8828462 | 0.00010324 | 0.00067417 |
| YGL001C   | 4694.11951 | -0.6428313 | 0.19531796 | -3.2912041 | 0.00099759 | 0.00451699 |
| YGL009C   | 61359.8788 | -2.8504157 | 0.16726369 | -17.041449 | 4.05E-65   | 4.11E-62   |
| YGL010W   | 104.655194 | 1.08999931 | 0.26542281 | 4.10665281 | 4.01E-05   | 0.00030445 |
| YGL027C   | 4602.00678 | -0.6457075 | 0.14355652 | -4.497932  | 6.86E-06   | 6.78E-05   |
| YGL030W   | 4267.13924 | -0.6198911 | 0.16413882 | -3.7766271 | 0.00015897 | 0.00097297 |
| YGL031C   | 4424.09727 | -0.641412  | 0.1360259  | -4.715367  | 2.41E-06   | 2.80E-05   |
| YGL036W   | 514.200025 | 0.88297347 | 0.19261301 | 4.58418408 | 4.56E-06   | 4.79E-05   |
| YGL040C   | 2391.83843 | -0.6156558 | 0.14235469 | -4.3248012 | 1.53E-05   | 0.00013633 |
| YGL043W   | 2322.83946 | -0.5920387 | 0.14252186 | -4.1540202 | 3.27E-05   | 0.00025572 |
| YGL045W   | 130.495848 | 0.81886652 | 0.24545189 | 3.33615893 | 0.00084945 | 0.00393993 |
| YGL048C   | 6855.85199 | -0.6911066 | 0.12667126 | -5.4559068 | 4.87E-08   | 8.88E-07   |
| YGL055W   | 20890.7715 | -0.8309618 | 0.1783446  | -4.6593045 | 3.17E-06   | 3.57E-05   |
| YGL063W   | 517.048932 | -0.7066774 | 0.16603449 | -4.2562085 | 2.08E-05   | 0.00017538 |
| YGL067W   | 1034.67356 | -0.6644966 | 0.14400415 | -4.6144269 | 3.94E-06   | 4.23E-05   |
| YGL068W   | 3619.46051 | -0.7065494 | 0.1846008  | -3.8274452 | 0.00012948 | 0.00081883 |
| YGL070C   | 988.902485 | -0.6638084 | 0.15955591 | -4.16035   | 3.18E-05   | 0.00025034 |
| YGL089C   | 1377.59668 | 1.03848898 | 0.18305436 | 5.67311798 | 1.40E-08   | 3.01E-07   |
| YGL091C   | 2114.11733 | -0.6204411 | 0.135505   | -4.5787326 | 4.68E-06   | 4.90E-05   |
| YGL103W   | 72085.5733 | -0.7310813 | 0.11916572 | -6.1349963 | 8.52E-10   | 2.26E-08   |
| YGL111W   | 3973.81289 | -0.7031302 | 0.12427903 | -5.6576737 | 1.53E-08   | 3.24E-07   |
| YGL118C   | 10.54681   | 1.16359688 | 0.36092156 | 3.2239606  | 0.00126431 | 0.0055155  |
| YGL123W   | 94692.6893 | -1.0882222 | 0.13954098 | -7.7985849 | 6.26E-15   | 4.59E-13   |
| YGL126W   | 2143.35109 | -0.6965369 | 0.13270698 | -5.2486831 | 1.53E-07   | 2.49E-06   |
| YGL135W   | 13535.6248 | -0.8051073 | 0.12537855 | -6.4214121 | 1.35E-10   | 4.29E-09   |
| YGL138C   | 17.9081566 | 1.4555187  | 0.37169705 | 3.9158737  | 9.01E-05   | 0.0006015  |
| YGL147C   | 36249.3562 | -0.9532835 | 0.15520071 | -6.1422624 | 8.14E-10   | 2.17E-08   |
| YGL170C   | 58.5937062 | 1.17363975 | 0.33865349 | 3.46560656 | 0.00052904 | 0.00265172 |

|           |            |            |            |            |            |            |
|-----------|------------|------------|------------|------------|------------|------------|
| YGL178W   | 79.0753938 | 1.05940221 | 0.30699222 | 3.45090902 | 0.0005587  | 0.00277302 |
| YGL181W   | 487.264653 | 0.60254617 | 0.18883964 | 3.19078224 | 0.00141888 | 0.00609809 |
| YGL187C   | 1275.76783 | -0.7939604 | 0.15690949 | -5.0599899 | 4.19E-07   | 6.11E-06   |
| YGL188C   | 179.041738 | -0.9357321 | 0.22279992 | -4.1998762 | 2.67E-05   | 0.00021513 |
| YGL192W   | 44.6571249 | 1.48064367 | 0.35355229 | 4.18790582 | 2.82E-05   | 0.00022531 |
| YGL215W   | 163.852956 | 0.83081195 | 0.25361859 | 3.27583221 | 0.00105351 | 0.00471063 |
| YGL219C   | 175.479635 | 1.15490762 | 0.23079245 | 5.00409626 | 5.61E-07   | 7.89E-06   |
| YGL221C   | 3895.87532 | -0.8221717 | 0.13298154 | -6.1826005 | 6.31E-10   | 1.72E-08   |
| YGL229C   | 852.52385  | 0.82944638 | 0.14940564 | 5.55164037 | 2.83E-08   | 5.61E-07   |
| YGL244W   | 1869.89014 | 0.77638003 | 0.15247079 | 5.09199195 | 3.54E-07   | 5.21E-06   |
| YGL247W   | 1060.91954 | 1.72339404 | 0.14790492 | 11.65204   | 2.24E-31   | 8.53E-29   |
| YGL248W   | 3974.43016 | 2.53494082 | 0.14150125 | 17.9146174 | 9.07E-72   | 1.10E-68   |
| YGL249W   | 74.3464328 | 0.84563899 | 0.2928779  | 2.88734318 | 0.0038851  | 0.01393316 |
| YGL253W   | 37289.6188 | -0.8369904 | 0.12650253 | -6.6163926 | 3.68E-11   | 1.31E-09   |
| YGL262W   | 44.7320384 | 1.80012494 | 0.34470039 | 5.2222886  | 1.77E-07   | 2.81E-06   |
| YGL263W   | 315.067395 | 1.7450703  | 0.22738327 | 7.6745765  | 1.66E-14   | 1.12E-12   |
| YGR020C   | 6278.98193 | -0.8920001 | 0.12392101 | -7.1981344 | 6.10E-13   | 3.00E-11   |
| YGR021W   | 1348.304   | -0.5940958 | 0.14932662 | -3.9784986 | 6.94E-05   | 0.00047832 |
| YGR023W   | 35.9812688 | 1.12454908 | 0.3438877  | 3.27010553 | 0.00107507 | 0.00478947 |
| YGR024C   | 1356.89015 | -0.6024531 | 0.1943533  | -3.0997834 | 0.00193662 | 0.00784067 |
| YGR027C   | 9571.10149 | -0.8726171 | 0.12565846 | -6.9443563 | 3.80E-12   | 1.60E-10   |
| YGR031W   | 2937.35317 | -0.6493214 | 0.13605945 | -4.7723357 | 1.82E-06   | 2.22E-05   |
| YGR044C   | 3187.68843 | -0.7893782 | 0.16634894 | -4.7453157 | 2.08E-06   | 2.48E-05   |
| YGR055W   | 4818.04991 | -0.6781716 | 0.13458124 | -5.0391241 | 4.68E-07   | 6.69E-06   |
| YGR059W   | 82.5721363 | 1.82266457 | 0.292014   | 6.24170261 | 4.33E-10   | 1.26E-08   |
| YGR062C   | 572.807178 | -0.6768163 | 0.16555379 | -4.0881957 | 4.35E-05   | 0.00032486 |
| YGR067C   | 43.9700116 | 1.0776308  | 0.33672631 | 3.20031655 | 0.00137277 | 0.00592498 |
| YGR070W   | 882.623865 | 0.79806943 | 0.17059344 | 4.67819522 | 2.89E-06   | 3.29E-05   |
| YGR075C   | 386.013502 | -0.663463  | 0.21915185 | -3.0274123 | 0.00246657 | 0.0096353  |
| YGR081C   | 1797.73167 | -0.9405092 | 0.15110669 | -6.2241398 | 4.84E-10   | 1.38E-08   |
| YGR097W   | 199.901529 | 0.71698049 | 0.21807391 | 3.28778669 | 0.00100978 | 0.00455524 |
| YGR106C   | 6141.29106 | -0.8347985 | 0.14817673 | -5.6338029 | 1.76E-08   | 3.64E-07   |
| YGR108W   | 3193.81874 | -0.9465733 | 0.13692568 | -6.9130446 | 4.74E-12   | 1.97E-10   |
| YGR118W   | 45111.8545 | -0.7068841 | 0.12954703 | -5.4565831 | 4.85E-08   | 8.88E-07   |
| YGR123C   | 5721.19872 | -0.9249018 | 0.12637175 | -7.3188967 | 2.50E-13   | 1.37E-11   |
| YGR130C   | 850.542825 | 0.84601442 | 0.15381232 | 5.50030332 | 3.79E-08   | 7.25E-07   |
| YGR142W   | 282.852205 | 1.13204985 | 0.24244383 | 4.66932834 | 3.02E-06   | 3.42E-05   |
| YGR147C   | 3148.1812  | -0.636594  | 0.12688397 | -5.0171351 | 5.24E-07   | 7.41E-06   |
| YGR148C   | 13237.5555 | -0.8117131 | 0.1259848  | -6.4429446 | 1.17E-10   | 3.78E-09   |
| YGR152C   | 1196.64578 | -0.61197   | 0.14318303 | -4.2740402 | 1.92E-05   | 0.00016451 |
| YGR157W   | 15172.6526 | -0.6463214 | 0.12328226 | -5.2426152 | 1.58E-07   | 2.56E-06   |
| YGR159C   | 11232.6298 | -1.0336187 | 0.12591354 | -8.2089553 | 2.23E-16   | 1.91E-14   |
| YGR163W   | 1974.6281  | -0.6060654 | 0.16027305 | -3.7814556 | 0.00015591 | 0.00095621 |
| YGR165W   | 2310.965   | -0.908754  | 0.13935088 | -6.5213366 | 6.97E-11   | 2.34E-09   |
| YGR175C   | 23614.6808 | -0.5951732 | 0.14900857 | -3.9942209 | 6.49E-05   | 0.00045227 |
| YGR196C   | 1608.21281 | 0.65147505 | 0.16289009 | 3.9994762  | 6.35E-05   | 0.00044336 |
| YGR205W   | 491.278165 | -0.6845343 | 0.17200332 | -3.9797735 | 6.90E-05   | 0.0004763  |
| YGR214W   | 5158.63426 | -0.6634269 | 0.1370563  | -4.840543  | 1.29E-06   | 1.67E-05   |
| YGR220C   | 502.32379  | -0.6633627 | 0.19091943 | -3.4745686 | 0.00051168 | 0.00258169 |
| YGR221C   | 36.3029791 | 1.14127839 | 0.34990502 | 3.26168057 | 0.00110754 | 0.00491709 |
| YGR225W   | 73.0530048 | 1.08889767 | 0.30812574 | 3.53393937 | 0.00040941 | 0.00215314 |
| YGR227W   | 98.9020389 | 0.84674751 | 0.26807704 | 3.15859767 | 0.0015853  | 0.00669057 |
| YGR233C   | 1955.29826 | -1.1528171 | 0.1389432  | -8.2970388 | 1.07E-16   | 9.70E-15   |
| YGR234W   | 30382.1142 | -0.8249977 | 0.13675468 | -6.0326836 | 1.61E-09   | 4.18E-08   |
| YGR237C   | 1107.0025  | 0.62705241 | 0.1707624  | 3.67207548 | 0.00024059 | 0.00137576 |
| YGR242W   | 7.55574156 | 1.00221472 | 0.34085377 | 2.940307   | 0.00327887 | 0.01216098 |
| YGR243W   | 179.102886 | -0.8488704 | 0.24566584 | -3.4553863 | 0.0005495  | 0.00273473 |
| YGR247W   | 986.562963 | -0.6243846 | 0.15660488 | -3.9870063 | 6.69E-05   | 0.00046359 |
| YGR253C   | 9115.0744  | -0.7023168 | 0.12546809 | -5.5975729 | 2.17E-08   | 4.37E-07   |
| YGR254W   | 10144.3307 | -1.4935521 | 0.14608748 | -10.223683 | 1.55E-24   | 3.26E-22   |
| YGR257C   | 4194.99721 | -0.80014   | 0.14155317 | -5.6525755 | 1.58E-08   | 3.31E-07   |
| YGR262C   | 1050.0307  | -0.674955  | 0.16591514 | -4.0680735 | 4.74E-05   | 0.00034738 |
| YGR267C   | 3459.07663 | -0.7615322 | 0.19886167 | -3.8294571 | 0.00012843 | 0.00081301 |
| YGR271C-A | 2624.38062 | -0.6023075 | 0.14009635 | -4.2992378 | 1.71E-05   | 0.00015018 |
| YGR271W   | 2178.32385 | 0.64958671 | 0.13374332 | 4.8569656  | 1.19E-06   | 1.55E-05   |
| YGR283C   | 1175.99392 | -0.6848232 | 0.16102858 | -4.2528056 | 2.11E-05   | 0.00017709 |

|           |            |            |            |            |            |            |
|-----------|------------|------------|------------|------------|------------|------------|
| YHL001W   | 3843.39    | -0.5884251 | 0.13582227 | -4.3323167 | 1.48E-05   | 0.00013253 |
| YHL003C   | 4953.37781 | -0.630177  | 0.13297536 | -4.7390513 | 2.15E-06   | 2.55E-05   |
| YHL006C   | 241.544726 | -0.6021914 | 0.20745083 | -2.9028151 | 0.00369825 | 0.01335053 |
| YHL011C   | 6169.32769 | -0.5958193 | 0.12609042 | -4.7253336 | 2.30E-06   | 2.69E-05   |
| YHL015W   | 32742.1141 | -1.6219527 | 0.11840199 | -13.698695 | 1.03E-42   | 6.99E-40   |
| YHL021C   | 452.58464  | 0.86602964 | 0.22357289 | 3.87358975 | 0.00010724 | 0.00069703 |
| YHL034C   | 4828.78972 | -0.931208  | 0.19504515 | -4.7743204 | 1.80E-06   | 2.21E-05   |
| YHL035C   | 2449.39691 | -0.7525181 | 0.14084642 | -5.3428268 | 9.15E-08   | 1.57E-06   |
| YHL040C   | 962.286657 | -0.7496781 | 0.16166903 | -4.6371164 | 3.53E-06   | 3.86E-05   |
| YHL050C   | 390.086419 | 0.82080845 | 0.19463527 | 4.21716187 | 2.47E-05   | 0.00020251 |
| YHR003C   | 2758.72035 | -0.7401317 | 0.13709266 | -5.3987694 | 6.71E-08   | 1.18E-06   |
| YHR007C   | 9130.9204  | -0.6342795 | 0.12102783 | -5.2407735 | 1.60E-07   | 2.57E-06   |
| YHR010W   | 57456.8199 | -0.9116874 | 0.14539038 | -6.2706171 | 3.60E-10   | 1.07E-08   |
| YHR023W   | 15658.7054 | 0.59494083 | 0.14075283 | 4.22684799 | 2.37E-05   | 0.00019477 |
| YHR035W   | 154.219149 | 0.68978781 | 0.23176236 | 2.97627197 | 0.00291776 | 0.01108494 |
| YHR041C   | 1015.85788 | -1.0163505 | 0.15716783 | -6.4666576 | 1.00E-10   | 3.28E-09   |
| YHR043C   | 1541.48335 | -0.662433  | 0.15427474 | -4.2938526 | 1.76E-05   | 0.00015343 |
| YHR046C   | 1303.41046 | -0.9006821 | 0.17173706 | -5.2445415 | 1.57E-07   | 2.54E-06   |
| YHR047C   | 6966.87059 | -0.7877057 | 0.14018973 | -5.6188549 | 1.92E-08   | 3.94E-07   |
| YHR049W   | 3801.86922 | -1.3007677 | 0.12509917 | -10.397892 | 2.53E-25   | 5.51E-23   |
| YHR058C   | 1327.62534 | -0.5888742 | 0.13981635 | -4.2117694 | 2.53E-05   | 0.00020602 |
| YHR062C   | 648.344255 | -1.053616  | 0.1991362  | -5.2909316 | 1.22E-07   | 2.06E-06   |
| YHR068W   | 787.754334 | -0.65772   | 0.21104945 | -3.1164261 | 0.00183058 | 0.00750216 |
| YHR069C   | 3842.8686  | -0.6198177 | 0.13606399 | -4.5553398 | 5.23E-06   | 5.35E-05   |
| YHR070W   | 1175.49341 | -0.6008614 | 0.17517501 | -3.4300633 | 0.00060344 | 0.0029589  |
| YHR076W   | 2583.61478 | -0.666788  | 0.13912198 | -4.7928296 | 1.64E-06   | 2.04E-05   |
| YHR082C   | 1991.2703  | 0.86894675 | 0.1651772  | 5.26069425 | 1.44E-07   | 2.36E-06   |
| YHR083W   | 1014.78123 | -0.5809957 | 0.15848763 | -3.6658742 | 0.0002465  | 0.00140295 |
| YHR084W   | 313.260379 | 0.62847245 | 0.19833508 | 3.16874083 | 0.00153101 | 0.00650198 |
| YHR088W   | 1077.42004 | -0.6686916 | 0.1699732  | -3.9341    | 8.35E-05   | 0.0005632  |
| YHR089C   | 10285.5525 | -0.7228617 | 0.13502962 | -5.3533564 | 8.63E-08   | 1.49E-06   |
| YHR094C   | 1891.90421 | -1.0583288 | 0.2196656  | -4.8179088 | 1.45E-06   | 1.83E-05   |
| YHR096C   | 87.0795098 | 1.089303   | 0.31244798 | 3.48634996 | 0.00048966 | 0.0025017  |
| YHR107C   | 1882.05625 | -0.737226  | 0.19405421 | -3.7990726 | 0.00014524 | 0.00090348 |
| YHR109W   | 144.036606 | 0.85137746 | 0.25551982 | 3.33194296 | 0.00086242 | 0.00398911 |
| YHR112C   | 1496.25829 | -0.6544021 | 0.17317303 | -3.7788916 | 0.00015753 | 0.00096514 |
| YHR124W   | 68.718499  | 0.91005971 | 0.31479115 | 2.89099519 | 0.00384024 | 0.01380582 |
| YHR133C   | 5015.32827 | -0.7638523 | 0.13466346 | -5.672306  | 1.41E-08   | 3.01E-07   |
| YHR134W   | 927.433092 | -0.6738482 | 0.16331413 | -4.1260864 | 3.69E-05   | 0.0002836  |
| YHR136C   | 167.893379 | -3.9655644 | 0.28691925 | -13.821186 | 1.90E-43   | 1.45E-40   |
| YHR137W   | 493.755528 | -0.8836099 | 0.23679321 | -3.7315677 | 0.00019029 | 0.00111645 |
| YHR141C   | 12864.1376 | -0.6778885 | 0.13436451 | -5.0451454 | 4.53E-07   | 6.56E-06   |
| YHR154W   | 3837.36038 | 0.58597185 | 0.14289909 | 4.10059896 | 4.12E-05   | 0.00031059 |
| YHR160C   | 37.8877624 | 0.995011   | 0.34101799 | 2.91776688 | 0.00352548 | 0.01289401 |
| YHR162W   | 11979.221  | -0.9830645 | 0.21754555 | -4.5188902 | 6.22E-06   | 6.21E-05   |
| YHR163W   | 1757.10741 | -0.5951201 | 0.17734146 | -3.3557866 | 0.0007914  | 0.0037217  |
| YHR169W   | 3497.81053 | -0.6838571 | 0.12713694 | -5.3789014 | 7.49E-08   | 1.31E-06   |
| YHR170W   | 8691.43866 | -0.6447094 | 0.13678109 | -4.71344   | 2.44E-06   | 2.82E-05   |
| YHR174W   | 180035.967 | -0.7253868 | 0.12619045 | -5.7483497 | 9.01E-09   | 2.03E-07   |
| YHR175W   | 213.825245 | 0.65188427 | 0.21220319 | 3.07198149 | 0.00212643 | 0.00848621 |
| YHR177W   | 47.9483009 | 1.36567969 | 0.33000162 | 4.13840295 | 3.50E-05   | 0.00027063 |
| YHR179W   | 18132.8185 | -1.1334578 | 0.15700891 | -7.2190668 | 5.23E-13   | 2.66E-11   |
| YHR182W   | 102.627907 | 0.96603685 | 0.28784367 | 3.3561164  | 0.00079045 | 0.00372014 |
| YHR187W   | 1458.96146 | -0.6739831 | 0.16107766 | -4.1842124 | 2.86E-05   | 0.0002284  |
| YHR198C   | 68.6947518 | 1.28035937 | 0.29845473 | 4.28996175 | 1.79E-05   | 0.00015503 |
| YHR199C   | 1238.13364 | -0.7997624 | 0.16606946 | -4.8158304 | 1.47E-06   | 1.84E-05   |
| YHR200W   | 3736.2432  | -0.64584   | 0.12845756 | -5.0276531 | 4.97E-07   | 7.08E-06   |
| YHR203C   | 17155.7114 | -1.2492037 | 0.12501204 | -9.992667  | 1.64E-23   | 3.03E-21   |
| YHR205W   | 316.991652 | 0.6266912  | 0.18809815 | 3.3317244  | 0.0008631  | 0.00398911 |
| YHR208W   | 2121.53135 | -1.6417754 | 0.14619284 | -11.230204 | 2.90E-29   | 9.81E-27   |
| YHR209W   | 152.093065 | 0.85614914 | 0.24289577 | 3.52475943 | 0.00042387 | 0.00221956 |
| YHR213W   | 25.0017955 | 1.63367668 | 0.36955191 | 4.42069606 | 9.84E-06   | 9.32E-05   |
| YHR213W-A | 18.6001288 | 1.12290528 | 0.37025484 | 3.03279024 | 0.00242304 | 0.00948959 |
| YHR215W   | 997.00575  | -4.3506954 | 0.17857812 | -24.36298  | 4.22E-131  | 8.57E-128  |
| YHR216W   | 5925.51999 | -0.8292081 | 0.2027869  | -4.0890614 | 4.33E-05   | 0.00032437 |



|           |            |            |            |            |            |            |
|-----------|------------|------------|------------|------------|------------|------------|
| YHR217C   | 33.9924312 | 1.1324434  | 0.36732028 | 3.08298631 | 0.00204935 | 0.00822168 |
| YIL009W   | 4787.4731  | -1.0118198 | 0.12522822 | -8.0798071 | 6.49E-16   | 5.13E-14   |
| YIL012W   | 31.6693336 | 1.20509619 | 0.35632831 | 3.3819827  | 0.00071965 | 0.00344277 |
| YIL013C   | 170.380911 | 1.04594491 | 0.26450345 | 3.95437156 | 7.67E-05   | 0.0005239  |
| YIL015W   | 42.3843442 | 1.13021282 | 0.3403723  | 3.32051938 | 0.0008985  | 0.00412349 |
| YIL018W   | 54300.8734 | -1.0249386 | 0.12349484 | -8.2994443 | 1.05E-16   | 9.65E-15   |
| YIL021W   | 4939.41304 | -0.6743918 | 0.12263831 | -5.4990301 | 3.82E-08   | 7.25E-07   |
| YIL024C   | 438.941612 | 0.64964476 | 0.17143701 | 3.78940781 | 0.00015101 | 0.00093174 |
| YIL033C   | 406.890675 | 0.74931891 | 0.18229172 | 4.11054831 | 3.95E-05   | 0.00030011 |
| YIL037C   | 120.713266 | 1.65695346 | 0.26395766 | 6.27734564 | 3.44E-10   | 1.03E-08   |
| YIL039W   | 1874.92449 | -0.6593859 | 0.14221162 | -4.6366527 | 3.54E-06   | 3.86E-05   |
| YIL043C   | 8292.16198 | -0.684889  | 0.12561826 | -5.4521449 | 4.98E-08   | 9.05E-07   |
| YIL044C   | 368.383566 | -0.6418276 | 0.21430746 | -2.9948916 | 0.00274542 | 0.01056867 |
| YIL051C   | 1719.07692 | -0.8726051 | 0.19863993 | -4.3928988 | 1.12E-05   | 0.00010399 |
| YIL053W   | 1086.975   | -0.5843256 | 0.16218168 | -3.6029078 | 0.00031468 | 0.00172182 |
| YIL066C   | 101.84841  | 0.80012546 | 0.2701486  | 2.96179756 | 0.00305849 | 0.01151898 |
| YIL073C   | 227.489575 | 1.22696881 | 0.21193235 | 5.78943609 | 7.06E-09   | 1.63E-07   |
| YIL074C   | 4032.92146 | -0.851645  | 0.16177898 | -5.2642499 | 1.41E-07   | 2.33E-06   |
| YIL079C   | 1610.91916 | -0.5864445 | 0.19393002 | -3.0240003 | 0.00249456 | 0.00971969 |
| YIL083C   | 719.518762 | -0.644412  | 0.18083529 | -3.5635304 | 0.0003659  | 0.00195296 |
| YIL088C   | 4994.3313  | -0.6834414 | 0.21116053 | -3.2365961 | 0.00120964 | 0.00531127 |
| YIL099W   | 156.779561 | 1.06693426 | 0.23609355 | 4.51911645 | 6.21E-06   | 6.21E-05   |
| YIL100W   | 50.867571  | 0.94610148 | 0.32179073 | 2.94011418 | 0.00328091 | 0.01216115 |
| YIL101C   | 29.3895039 | 1.17890162 | 0.3650202  | 3.22968874 | 0.00123925 | 0.00542362 |
| YIL103W   | 2872.78621 | -0.7192422 | 0.14055975 | -5.1169858 | 3.10E-07   | 4.65E-06   |
| YIL106W   | 1222.01862 | -0.6205218 | 0.16486901 | -3.7637259 | 0.0001674  | 0.00100838 |
| YIL107C   | 2522.72559 | 0.63874852 | 0.12960366 | 4.92847574 | 8.29E-07   | 1.12E-05   |
| YIL110W   | 3754.48322 | -0.71926   | 0.13068609 | -5.5037224 | 3.72E-08   | 7.14E-07   |
| YIL112W   | 5906.48022 | 0.67349522 | 0.1465626  | 4.59527327 | 4.32E-06   | 4.58E-05   |
| YIL136W   | 856.184943 | 0.89441746 | 0.15762263 | 5.67442295 | 1.39E-08   | 2.99E-07   |
| YIL140W   | 191.473201 | 0.98932492 | 0.21811258 | 4.53584531 | 5.74E-06   | 5.78E-05   |
| YIL144W   | 482.099474 | 0.77418415 | 0.17351634 | 4.4617364  | 8.13E-06   | 7.92E-05   |
| YIL145C   | 3775.60393 | -0.8506495 | 0.12787559 | -6.6521647 | 2.89E-11   | 1.05E-09   |
| YIL149C   | 5925.07135 | 0.77417193 | 0.14329201 | 5.40275716 | 6.56E-08   | 1.16E-06   |
| YIL155C   | 236.238044 | 0.65943985 | 0.20349792 | 3.24052377 | 0.0011931  | 0.00524621 |
| YIL162W   | 1586.81622 | -0.6515772 | 0.15025122 | -4.3365854 | 1.45E-05   | 0.00013091 |
| YIR006C   | 368.255852 | 0.8023641  | 0.18543307 | 4.3269742  | 1.51E-05   | 0.00013539 |
| YIR007W   | 176.994882 | 0.72239525 | 0.22646486 | 3.18987793 | 0.00142333 | 0.00611289 |
| YIR011C   | 2528.23126 | -0.5825879 | 0.13190355 | -4.4167721 | 1.00E-05   | 9.44E-05   |
| YIR012W   | 12335.698  | -0.6816665 | 0.12964755 | -5.2578431 | 1.46E-07   | 2.39E-06   |
| YIR014W   | 243.227149 | 0.80214857 | 0.2199429  | 3.64707651 | 0.00026524 | 0.00148877 |
| YIR018W   | 565.772506 | -0.6033256 | 0.16843889 | -3.5818666 | 0.00034115 | 0.0018402  |
| YIR023W   | 166.068151 | 0.88070513 | 0.24382475 | 3.61204153 | 0.0003038  | 0.0016728  |
| YIR025W   | 328.221003 | 0.6364411  | 0.20768875 | 3.06439861 | 0.00218108 | 0.00868156 |
| YIR026C   | 1443.33408 | -1.0429849 | 0.13736175 | -7.5929793 | 3.13E-14   | 2.07E-12   |
| YIR027C   | 85.3311928 | 0.84627247 | 0.29048948 | 2.91326375 | 0.00357672 | 0.01301987 |
| YIR028W   | 83.0500222 | 1.32978704 | 0.30668497 | 4.33600334 | 1.45E-05   | 0.00013091 |
| YIR034C   | 689.531675 | 0.83117522 | 0.2453107  | 3.38825504 | 0.00070339 | 0.0033836  |
| YIR035C   | 1667.81314 | -0.7211607 | 0.14932087 | -4.8296044 | 1.37E-06   | 1.74E-05   |
| YJL011C   | 1358.08692 | -0.7209398 | 0.1554483  | -4.6378103 | 3.52E-06   | 3.86E-05   |
| YJL012C   | 14138.2861 | -2.3391977 | 0.1220151  | -19.171379 | 6.42E-82   | 9.77E-79   |
| YJL025W   | 84.3490072 | 0.87070458 | 0.28992793 | 3.0031759  | 0.00267178 | 0.01031778 |
| YJL030W   | 894.974115 | -0.6341833 | 0.14981298 | -4.2331667 | 2.30E-05   | 0.00019015 |
| YJL034W   | 15751.4791 | -0.9165066 | 0.15655857 | -5.8540809 | 4.80E-09   | 1.13E-07   |
| YJL038C   | 51.9239808 | 1.86356423 | 0.32717355 | 5.69595024 | 1.23E-08   | 2.68E-07   |
| YJL041W   | 485.257791 | 0.72566163 | 0.18559845 | 3.90984743 | 9.24E-05   | 0.00061402 |
| YJL045W   | 90.4668236 | 1.1874233  | 0.27852798 | 4.26321011 | 2.02E-05   | 0.00017089 |
| YJL047C-A | 155.284701 | 1.086607   | 0.25327397 | 4.29024347 | 1.78E-05   | 0.00015503 |
| YJL049W   | 286.490127 | 0.64246076 | 0.19191875 | 3.34756636 | 0.00081524 | 0.00381324 |
| YJL052W   | 1837.14629 | -1.9667638 | 0.21315166 | -9.2270627 | 2.78E-20   | 4.13E-18   |
| YJL060W   | 143.913374 | 0.71714377 | 0.24294263 | 2.95190579 | 0.00315819 | 0.01179239 |
| YJL062W   | 436.00936  | 0.76118948 | 0.17730376 | 4.29313779 | 1.76E-05   | 0.0001537  |
| YJL063C   | 1386.69312 | -0.7175408 | 0.17283154 | -4.1516773 | 3.30E-05   | 0.00025802 |
| YJL084C   | 72.3661672 | 1.10077167 | 0.2989238  | 3.68244913 | 0.000231   | 0.00132718 |

|           |            |            |            |            |            |            |
|-----------|------------|------------|------------|------------|------------|------------|
| YJL101C   | 3827.17624 | -0.6735372 | 0.12794944 | -5.2640887 | 1.41E-07   | 2.33E-06   |
| YJL105W   | 82.2276355 | 1.17572772 | 0.30175808 | 3.89625923 | 9.77E-05   | 0.00064456 |
| YJL106W   | 173.987289 | 0.76572107 | 0.22925706 | 3.34001089 | 0.00083775 | 0.00389756 |
| YJL117W   | 3560.53206 | -1.3854672 | 0.14929877 | -9.2798299 | 1.70E-20   | 2.65E-18   |
| YJL119C   | 87.020565  | -1.2141303 | 0.28069536 | -4.3254378 | 1.52E-05   | 0.00013613 |
| YJL122W   | 1159.3046  | -0.9351925 | 0.1477524  | -6.3294573 | 2.46E-10   | 7.49E-09   |
| YJL127C   | 1111.79813 | 0.69989735 | 0.15040274 | 4.65348799 | 3.26E-06   | 3.65E-05   |
| YJL134W   | 2967.49319 | -1.009523  | 0.1488366  | -6.7827601 | 1.18E-11   | 4.72E-10   |
| YJL136C   | 4507.15546 | -0.7965609 | 0.12630571 | -6.3066103 | 2.85E-10   | 8.64E-09   |
| YJL145W   | 1654.80939 | -0.6451123 | 0.13877052 | -4.6487701 | 3.34E-06   | 3.70E-05   |
| YJL153C   | 223.89125  | 0.98535339 | 0.21952712 | 4.48852699 | 7.17E-06   | 7.08E-05   |
| YJL159W   | 551.978223 | 0.67469151 | 0.1655688  | 4.07499178 | 4.60E-05   | 0.00034134 |
| YJL163C   | 620.267466 | 0.7087121  | 0.16035022 | 4.41977618 | 9.88E-06   | 9.33E-05   |
| YJL167W   | 13707.3337 | -0.846723  | 0.1642752  | -5.154296  | 2.55E-07   | 3.91E-06   |
| YJL170C   | 26.56725   | 1.29548038 | 0.36327467 | 3.56611814 | 0.00036231 | 0.00193719 |
| YJL171C   | 4619.59166 | -0.958943  | 0.15375738 | -6.2367278 | 4.47E-10   | 1.29E-08   |
| YJL172W   | 591.832375 | -0.6220856 | 0.1825644  | -3.4074858 | 0.00065564 | 0.00318665 |
| YJL177W   | 5128.26329 | -0.5946767 | 0.12780317 | -4.6530667 | 3.27E-06   | 3.65E-05   |
| YJL183W   | 6749.08205 | -0.6665175 | 0.13166905 | -5.0620669 | 4.15E-07   | 6.06E-06   |
| YJL186W   | 9837.43799 | -0.6073825 | 0.12555514 | -4.8375755 | 1.31E-06   | 1.69E-05   |
| YJL187C   | 915.856035 | 0.69223878 | 0.18741559 | 3.69360306 | 0.0002211  | 0.0012763  |
| YJL195C   | 30.6261554 | 1.33784603 | 0.37125151 | 3.60361101 | 0.00031383 | 0.00172026 |
| YJL207C   | 7417.89811 | 0.59132663 | 0.14776554 | 4.00178987 | 6.29E-05   | 0.00043955 |
| YJR003C   | 3134.99519 | -0.6260362 | 0.15255545 | -4.1036633 | 4.07E-05   | 0.00030803 |
| YJR004C   | 1208.35537 | 1.11708786 | 0.1760106  | 6.34670779 | 2.20E-10   | 6.77E-09   |
| YJR009C   | 28265.1392 | -0.879788  | 0.18296512 | -4.8085009 | 1.52E-06   | 1.90E-05   |
| YJR010C-A | 379.495961 | -0.7395507 | 0.20314214 | -3.6405576 | 0.00027205 | 0.00151858 |
| YJR017C   | 358.210373 | -0.7232796 | 0.21720447 | -3.3299482 | 0.00086862 | 0.0040075  |
| YJR024C   | 2160.53769 | -0.742725  | 0.14169882 | -5.2415748 | 1.59E-07   | 2.57E-06   |
| YJR033C   | 1923.18799 | 0.65459312 | 0.13608075 | 4.81032865 | 1.51E-06   | 1.89E-05   |
| YJR036C   | 752.251674 | 0.69218996 | 0.16468658 | 4.20307453 | 2.63E-05   | 0.00021299 |
| YJR046W   | 4241.60705 | -0.6573701 | 0.13445292 | -4.8892212 | 1.01E-06   | 1.34E-05   |
| YJR047C   | 273.949426 | 1.16872028 | 0.25569107 | 4.57082952 | 4.86E-06   | 5.06E-05   |
| YJR048W   | 289.826078 | -0.998823  | 0.30137117 | -3.314262  | 0.00091885 | 0.00420422 |
| YJR064W   | 29568.499  | -0.6297388 | 0.14607775 | -4.3109837 | 1.63E-05   | 0.00014324 |
| YJR075W   | 4302.72421 | -0.5877097 | 0.12809364 | -4.5881253 | 4.47E-06   | 4.71E-05   |
| YJR091C   | 211.017053 | 1.17499593 | 0.21237781 | 5.5325739  | 3.16E-08   | 6.14E-07   |
| YJR093C   | 74.3715972 | 1.12662504 | 0.30102605 | 3.74261649 | 0.00018211 | 0.00108414 |
| YJR094W-A | 12493.7758 | -0.6257533 | 0.15322428 | -4.0839045 | 4.43E-05   | 0.00033011 |
| YJR095W   | 46.0801859 | 1.04222205 | 0.35323191 | 2.95053202 | 0.00317227 | 0.0118377  |
| YJR101W   | 1132.12814 | -0.8033009 | 0.16969094 | -4.733906  | 2.20E-06   | 2.59E-05   |
| YJR104C   | 9644.04442 | -0.6315152 | 0.18966846 | -3.329574  | 0.00086979 | 0.00400985 |
| YJR105W   | 19745.6938 | -0.6288506 | 0.12738977 | -4.9364297 | 7.96E-07   | 1.07E-05   |
| YJR113C   | 2232.0544  | -0.9185372 | 0.13286031 | -6.9135557 | 4.73E-12   | 1.97E-10   |
| YJR117W   | 202.50354  | 1.00116551 | 0.26096089 | 3.83645807 | 0.00012482 | 0.00079101 |
| YJR138W   | 3053.44864 | 0.65900229 | 0.13871662 | 4.75070888 | 2.03E-06   | 2.43E-05   |
| YJR139C   | 18492.4504 | -0.6515808 | 0.14464032 | -4.5048348 | 6.64E-06   | 6.59E-05   |
| YJR145C   | 22733.2524 | -1.070241  | 0.11997248 | -8.9207211 | 4.63E-19   | 5.53E-17   |
| YJR148W   | 33970.1814 | -0.8796254 | 0.16496024 | -5.3323477 | 9.70E-08   | 1.66E-06   |
| YJR150C   | 53.9436043 | 2.31670438 | 0.34201159 | 6.77375993 | 1.25E-11   | 4.93E-10   |
| YKL006W   | 4930.27521 | -0.693926  | 0.12912395 | -5.3741076 | 7.70E-08   | 1.34E-06   |
| YKL007W   | 1631.22106 | -0.6228633 | 0.18427651 | -3.3800475 | 0.00072473 | 0.00346438 |
| YKL009W   | 6282.80752 | -0.6155587 | 0.14278565 | -4.3110687 | 1.62E-05   | 0.00014324 |
| YKL015W   | 5295.96823 | -0.8572287 | 0.13861341 | -6.1843126 | 6.24E-10   | 1.72E-08   |
| YKL019W   | 806.6409   | -0.6732958 | 0.15184603 | -4.4340689 | 9.25E-06   | 8.87E-05   |
| YKL027W   | 1555.24361 | -0.6720297 | 0.15144842 | -4.4373503 | 9.11E-06   | 8.78E-05   |
| YKL034W   | 128.271054 | 0.82353515 | 0.24666015 | 3.33874424 | 0.00084158 | 0.00391238 |
| YKL039W   | 1909.11575 | -0.6138964 | 0.19317894 | -3.1778639 | 0.00148364 | 0.0063273  |
| YKL042W   | 80.8799198 | 0.86731105 | 0.28688752 | 3.02317461 | 0.00250138 | 0.00974002 |
| YKL046C   | 10003.9113 | -0.6643185 | 0.13924931 | -4.770713  | 1.84E-06   | 2.23E-05   |
| YKL054C   | 2938.70999 | 0.69782351 | 0.16428616 | 4.24760975 | 2.16E-05   | 0.00018025 |
| YKL056C   | 46679.2065 | -0.5944049 | 0.13417669 | -4.430016  | 9.42E-06   | 9.00E-05   |
| YKL060C   | 78562.4994 | -0.8659247 | 0.12011452 | -7.2091592 | 5.63E-13   | 2.79E-11   |
| YKL062W   | 89.6606693 | 1.05934695 | 0.27532203 | 3.84766502 | 0.00011925 | 0.00076204 |
| YKL080W   | 13302.9494 | -0.64881   | 0.12720522 | -5.1004981 | 3.39E-07   | 5.02E-06   |
| YKL094W   | 3722.04323 | -0.5820372 | 0.12578015 | -4.6274169 | 3.70E-06   | 4.02E-05   |

|         |            |            |            |            |            |            |
|---------|------------|------------|------------|------------|------------|------------|
| YKL098W | 648.618362 | -0.6193122 | 0.16445531 | -3.7658392 | 0.00016599 | 0.00100585 |
| YKL105C | 427.06888  | 0.84702781 | 0.21671918 | 3.9084118  | 9.29E-05   | 0.000617   |
| YKL120W | 13819.4422 | -1.8777911 | 0.33916931 | -5.5364417 | 3.09E-08   | 6.04E-07   |
| YKL121W | 586.176972 | 1.73028207 | 0.17025899 | 10.1626472 | 2.91E-24   | 5.72E-22   |
| YKL124W | 241.897355 | 0.61669469 | 0.20862343 | 2.95601835 | 0.00311639 | 0.01167925 |
| YKL128C | 3683.21667 | -0.9118737 | 0.16583024 | -5.4988387 | 3.82E-08   | 7.25E-07   |
| YKL129C | 2704.3666  | 0.78822315 | 0.15225833 | 5.1768804  | 2.26E-07   | 3.50E-06   |
| YKL142W | 1233.0109  | -0.7201447 | 0.16854358 | -4.2727505 | 1.93E-05   | 0.00016491 |
| YKL148C | 411.921111 | 0.61603525 | 0.17828602 | 3.45532007 | 0.00054964 | 0.00273473 |
| YKL152C | 50533.5719 | -1.1251314 | 0.12663633 | -8.8847439 | 6.41E-19   | 7.23E-17   |
| YKL181W | 4157.30124 | -0.7855217 | 0.12683001 | -6.1935005 | 5.88E-10   | 1.64E-08   |
| YKL183W | 1234.95896 | -0.91359   | 0.14797482 | -6.1739558 | 6.66E-10   | 1.81E-08   |
| YKL186C | 658.518775 | -0.7726515 | 0.15691924 | -4.9238798 | 8.48E-07   | 1.14E-05   |
| YKL187C | 55.6003638 | 1.19278616 | 0.31646185 | 3.76913094 | 0.00016382 | 0.00099565 |
| YKL191W | 3941.2626  | -0.5840663 | 0.13978265 | -4.1783891 | 2.94E-05   | 0.0002331  |
| YKL201C | 226.517539 | 0.69917869 | 0.23003419 | 3.03945547 | 0.00237006 | 0.00931806 |
| YKL207W | 3657.8267  | -0.8109002 | 0.18455415 | -4.3938337 | 1.11E-05   | 0.00010371 |
| YKL216W | 17561.0327 | -0.6938101 | 0.12273012 | -5.6531361 | 1.58E-08   | 3.31E-07   |
| YKL221W | 84.6015992 | 1.06122978 | 0.30732583 | 3.45310961 | 0.00055416 | 0.00275324 |
| YKR008W | 244.408846 | 0.71532352 | 0.20132277 | 3.55311782 | 0.00038069 | 0.00202242 |
| YKR009C | 140.942686 | 0.76235371 | 0.25135389 | 3.03298945 | 0.00242144 | 0.00948943 |
| YKR015C | 85.5822518 | 1.31364382 | 0.28563846 | 4.59897387 | 4.25E-06   | 4.52E-05   |
| YKR016W | 735.441617 | 0.65205186 | 0.15552166 | 4.19267566 | 2.76E-05   | 0.00022091 |
| YKR023W | 1154.25078 | 0.59658602 | 0.16456405 | 3.62525112 | 0.00028868 | 0.00160261 |
| YKR026C | 4016.93436 | -0.7471679 | 0.13680944 | -5.4613765 | 4.72E-08   | 8.69E-07   |
| YKR039W | 2242.96593 | -0.7484712 | 0.14686982 | -5.0961535 | 3.47E-07   | 5.12E-06   |
| YKR042W | 879.958202 | 0.63142204 | 0.16189895 | 3.90009977 | 9.62E-05   | 0.00063605 |
| YKR043C | 2921.13721 | -0.7560018 | 0.16211727 | -4.6633019 | 3.11E-06   | 3.51E-05   |
| YKR044W | 1052.65319 | -0.6265141 | 0.14721962 | -4.2556425 | 2.08E-05   | 0.00017558 |
| YKR052C | 1500.41368 | -1.019537  | 0.14338444 | -7.110514  | 1.16E-12   | 5.42E-11   |
| YKR058W | 267.320622 | 0.83193954 | 0.2139496  | 3.88848369 | 0.00010087 | 0.00066269 |
| YKR059W | 6021.62018 | -1.1980743 | 0.13035105 | -9.1911361 | 3.89E-20   | 5.51E-18   |
| YKR062W | 1027.45053 | -0.7742006 | 0.19060869 | -4.0617279 | 4.87E-05   | 0.000354   |
| YKR070W | 2232.37339 | -0.5811494 | 0.14011057 | -4.1477915 | 3.36E-05   | 0.00026165 |
| YKR071C | 992.178037 | -0.928444  | 0.16983131 | -5.46686   | 4.58E-08   | 8.48E-07   |
| YKR074W | 1947.82693 | -0.7867815 | 0.13751961 | -5.7212317 | 1.06E-08   | 2.35E-07   |
| YKR087C | 1696.20675 | -0.6398402 | 0.18199993 | -3.5156066 | 0.00043875 | 0.00228962 |
| YKR093W | 3482.14905 | -1.0108985 | 0.13699117 | -7.3792971 | 1.59E-13   | 9.06E-12   |
| YKR095W | 8161.39091 | 0.63144238 | 0.14253997 | 4.42993197 | 9.43E-06   | 9.00E-05   |
| YKR097W | 67.7642919 | 0.9216004  | 0.29851388 | 3.08729499 | 0.00201987 | 0.00812484 |
| YKR103W | 795.011366 | 0.74589742 | 0.15386536 | 4.847728   | 1.25E-06   | 1.61E-05   |
| YKR104W | 164.70389  | 0.79564467 | 0.26187217 | 3.0382941  | 0.00237922 | 0.00934199 |
| YKR105C | 53.6986916 | 1.25865354 | 0.35079239 | 3.58802981 | 0.00033319 | 0.00180365 |
| YKR106W | 136.791163 | 0.79910122 | 0.26476527 | 3.01814966 | 0.00254323 | 0.00987773 |
| YLL005C | 48.1760479 | 1.63094583 | 0.33222045 | 4.9092276  | 9.14E-07   | 1.22E-05   |
| YLL019C | 258.575468 | 0.6705574  | 0.19948928 | 3.36137055 | 0.00077557 | 0.00366424 |
| YLL050C | 4607.46137 | -0.6556058 | 0.20929691 | -3.1324197 | 0.00173372 | 0.00720706 |
| YLL051C | 1194.67984 | -0.698821  | 0.1444211  | -4.8387733 | 1.31E-06   | 1.68E-05   |
| YLL053C | 307.127633 | -0.677818  | 0.23404414 | -2.8961119 | 0.00377818 | 0.0136068  |
| YLL061W | 3360.23323 | -0.7712739 | 0.15260971 | -5.0538979 | 4.33E-07   | 6.29E-06   |
| YLL062C | 516.96542  | -0.8752319 | 0.19272919 | -4.5412522 | 5.59E-06   | 5.66E-05   |
| YLR004C | 145.290334 | 0.85645944 | 0.23992371 | 3.56971579 | 0.00035737 | 0.00191414 |
| YLR006C | 219.798946 | 0.8362718  | 0.20979943 | 3.98605363 | 6.72E-05   | 0.00046493 |
| YLR008C | 1041.43023 | -0.8934502 | 0.18475206 | -4.8359418 | 1.33E-06   | 1.70E-05   |
| YLR016C | 623.186051 | -0.7848901 | 0.20040677 | -3.9164848 | 8.98E-05   | 0.00060064 |
| YLR022C | 1023.1762  | -0.6617196 | 0.15482738 | -4.2739186 | 1.92E-05   | 0.00016451 |
| YLR029C | 94206.5923 | -0.9888431 | 0.13286229 | -7.4426168 | 9.87E-14   | 5.89E-12   |
| YLR034C | 1810.03765 | -0.641149  | 0.15529063 | -4.1287035 | 3.65E-05   | 0.00028087 |
| YLR035C | 726.009514 | 0.60996489 | 0.16456329 | 3.70656727 | 0.00021009 | 0.00122434 |
| YLR054C | 122.900235 | 1.0904973  | 0.25270247 | 4.31534087 | 1.59E-05   | 0.00014126 |
| YLR056W | 7962.91588 | -0.7441992 | 0.16909101 | -4.4011755 | 1.08E-05   | 0.00010087 |
| YLR061W | 15210.8347 | -1.3568159 | 0.12842921 | -10.564699 | 4.34E-26   | 9.80E-24   |
| YLR075W | 162586.019 | -0.8833518 | 0.12310381 | -7.1756661 | 7.20E-13   | 3.48E-11   |
| YLR080W | 433.7665   | 0.71825716 | 0.19363185 | 3.70939579 | 0.00020775 | 0.0012119  |
| YLR126C | 1153.31449 | -0.8374828 | 0.14172595 | -5.9091707 | 3.44E-09   | 8.38E-08   |

|           |            |            |            |            |            |            |
|-----------|------------|------------|------------|------------|------------|------------|
| YLR130C   | 3593.66384 | -0.7045423 | 0.16109824 | -4.3733703 | 1.22E-05   | 0.00011238 |
| YLR136C   | 152.319838 | -1.9193212 | 0.24858591 | -7.7209574 | 1.15E-14   | 8.18E-13   |
| YLR149C   | 121.571901 | 1.26050819 | 0.2683941  | 4.6964824  | 2.65E-06   | 3.05E-05   |
| YLR150W   | 53087.4232 | -1.1548056 | 0.14085269 | -8.1986764 | 2.43E-16   | 2.06E-14   |
| YLR167W   | 94223.7653 | -0.9033745 | 0.11925681 | -7.5750353 | 3.59E-14   | 2.35E-12   |
| YLR172C   | 703.656768 | -0.635522  | 0.16139142 | -3.9377678 | 8.22E-05   | 0.00055589 |
| YLR179C   | 2588.44712 | -0.8080481 | 0.12989932 | -6.2205719 | 4.95E-10   | 1.41E-08   |
| YLR180W   | 20305.1907 | -0.6734673 | 0.15066191 | -4.4700568 | 7.82E-06   | 7.66E-05   |
| YLR189C   | 6747.06102 | 0.76199161 | 0.1483593  | 5.13612291 | 2.80E-07   | 4.25E-06   |
| YLR192C   | 5515.97573 | -0.7079716 | 0.13670993 | -5.1786404 | 2.24E-07   | 3.47E-06   |
| YLR205C   | 484.576812 | -1.3547306 | 0.25052222 | -5.4076266 | 6.39E-08   | 1.13E-06   |
| YLR206W   | 909.578155 | 1.06488123 | 0.15328327 | 6.94714577 | 3.73E-12   | 1.58E-10   |
| YLR208W   | 9301.31208 | -0.6898566 | 0.126175   | -5.4674583 | 4.57E-08   | 8.48E-07   |
| YLR209C   | 1220.15812 | -0.6651728 | 0.18184449 | -3.6579211 | 0.00025427 | 0.00144047 |
| YLR211C   | 236.88802  | 0.77582464 | 0.24423533 | 3.17654555 | 0.0014904  | 0.00635169 |
| YLR213C   | 305.905201 | -0.7343264 | 0.2351234  | -3.1231534 | 0.00178924 | 0.00739247 |
| YLR214W   | 7025.77227 | -1.1725343 | 0.21189786 | -5.533488  | 3.14E-08   | 6.13E-07   |
| YLR221C   | 1601.23224 | -0.6181349 | 0.15946975 | -3.8761891 | 0.00010611 | 0.00069036 |
| YLR243W   | 1728.84761 | -0.67714   | 0.1606386  | -4.2153007 | 2.49E-05   | 0.0002034  |
| YLR256W   | 4478.16793 | -0.5989641 | 0.13384816 | -4.4749524 | 7.64E-06   | 7.51E-05   |
| YLR264W   | 4017.23034 | -0.8602227 | 0.13423008 | -6.4085686 | 1.47E-10   | 4.64E-09   |
| YLR266C   | 2206.76015 | -0.6035461 | 0.13105267 | -4.6053706 | 4.12E-06   | 4.40E-05   |
| YLR276C   | 1139.92419 | -0.7070786 | 0.1764648  | -4.0069104 | 6.15E-05   | 0.00043112 |
| YLR285W   | 1584.36584 | -0.6524027 | 0.15217491 | -4.2871899 | 1.81E-05   | 0.00015612 |
| YLR286C   | 1222.45455 | 0.85205763 | 0.15188766 | 5.60978827 | 2.03E-08   | 4.13E-07   |
| YLR287C   | 2824.28289 | -0.6577359 | 0.13786556 | -4.7708502 | 1.83E-06   | 2.23E-05   |
| YLR291C   | 944.982034 | -0.704187  | 0.16016734 | -4.3965705 | 1.10E-05   | 0.00010272 |
| YLR300W   | 6289.7532  | -0.6820892 | 0.14200665 | -4.8032199 | 1.56E-06   | 1.94E-05   |
| YLR301W   | 7377.06776 | -0.635137  | 0.12054059 | -5.2690715 | 1.37E-07   | 2.28E-06   |
| YLR302C   | 19.126761  | 1.15190704 | 0.37117132 | 3.10343766 | 0.00191287 | 0.00776687 |
| YLR303W   | 4742.63015 | -0.6189114 | 0.20808724 | -2.974288  | 0.00293669 | 0.01114712 |
| YLR307W   | 62.4324688 | 1.49984472 | 0.31350859 | 4.78406256 | 1.72E-06   | 2.12E-05   |
| YLR312C   | 225.972965 | 0.62701214 | 0.20968654 | 2.99023553 | 0.00278762 | 0.01069057 |
| YLR312W-A | 2164.47799 | -0.8147605 | 0.15436068 | -5.2782901 | 1.30E-07   | 2.18E-06   |
| YLR325C   | 13039.0419 | -0.8338282 | 0.12423673 | -6.7116075 | 1.92E-11   | 7.24E-10   |
| YLR328W   | 1136.51238 | -0.8524059 | 0.15615893 | -5.4585794 | 4.80E-08   | 8.80E-07   |
| YLR335W   | 751.811523 | 0.77749826 | 0.17236501 | 4.51076627 | 6.46E-06   | 6.42E-05   |
| YLR343W   | 186.072143 | 0.88036286 | 0.22392148 | 3.93156946 | 8.44E-05   | 0.0005679  |
| YLR346C   | 334.654765 | -0.685481  | 0.20089372 | -3.4121575 | 0.00064451 | 0.00314005 |
| YLR348C   | 2391.41211 | -1.1529915 | 0.13040683 | -8.8414961 | 9.44E-19   | 1.05E-16   |
| YLR351C   | 1263.14659 | -0.8644745 | 0.18211878 | -4.7467621 | 2.07E-06   | 2.47E-05   |
| YLR354C   | 13180.6286 | -0.9022182 | 0.13239598 | -6.8145435 | 9.46E-12   | 3.84E-10   |
| YLR355C   | 43466.6837 | -1.1256914 | 0.15899283 | -7.0801398 | 1.44E-12   | 6.54E-11   |
| YLR373C   | 215.371246 | 0.71287264 | 0.22878774 | 3.11586901 | 0.00183404 | 0.00751129 |
| YLR405W   | 1483.15513 | -0.7875464 | 0.1455577  | -5.4105444 | 6.28E-08   | 1.12E-06   |
| YLR406C   | 2289.58353 | -0.7505041 | 0.13954983 | -5.3780367 | 7.53E-08   | 1.31E-06   |
| YLR423C   | 536.388761 | 0.71200886 | 0.1761047  | 4.04309965 | 5.27E-05   | 0.00037889 |
| YLR432W   | 2685.72515 | -0.6708074 | 0.13505609 | -4.9668804 | 6.80E-07   | 9.31E-06   |
| YLR437C   | 162.133574 | 0.75343654 | 0.22826654 | 3.30068759 | 0.00096448 | 0.00438412 |
| YLR441C   | 58945.3607 | -0.9680446 | 0.13466216 | -7.1886904 | 6.54E-13   | 3.19E-11   |
| YLR442C   | 2090.90258 | 0.67240204 | 0.13536863 | 4.96719234 | 6.79E-07   | 9.31E-06   |
| YLR447C   | 12835.1428 | -0.8886334 | 0.11921318 | -7.4541539 | 9.04E-14   | 5.51E-12   |
| YLR448W   | 3818.94818 | -0.9540364 | 0.14440309 | -6.6067591 | 3.93E-11   | 1.37E-09   |
| YML004C   | 6911.80034 | -0.6206871 | 0.18418337 | -3.3699412 | 0.00075184 | 0.00357433 |
| YML005W   | 500.891746 | -0.8019728 | 0.17570002 | -4.5644433 | 5.01E-06   | 5.17E-05   |
| YML022W   | 5773.35165 | -0.6158516 | 0.13931836 | -4.4204624 | 9.85E-06   | 9.32E-05   |
| YML024W   | 22786.3253 | -0.7278141 | 0.13452664 | -5.4101858 | 6.30E-08   | 1.12E-06   |
| YML026C   | 34963.8783 | -0.7462189 | 0.12667206 | -5.8909513 | 3.84E-09   | 9.24E-08   |
| YML063W   | 59722.5603 | -1.1105929 | 0.12496622 | -8.8871447 | 6.27E-19   | 7.20E-17   |
| YML064C   | 1154.04778 | -0.7067076 | 0.1456918  | -4.8507027 | 1.23E-06   | 1.60E-05   |
| YML066C   | 33.4631247 | 1.21653134 | 0.35557703 | 3.42128779 | 0.00062325 | 0.00304869 |
| YML076C   | 146.276543 | 0.96977436 | 0.23787529 | 4.07681839 | 4.57E-05   | 0.00033949 |
| YML101C   | 260.886207 | -0.6465195 | 0.19990515 | -3.2341313 | 0.00122013 | 0.00535347 |
| YML105C   | 1784.10367 | -0.6111803 | 0.13373449 | -4.570102  | 4.87E-06   | 5.07E-05   |
| YML106W   | 7963.39924 | -0.6818109 | 0.12128795 | -5.6214236 | 1.89E-08   | 3.90E-07   |

|           |            |            |            |            |            |            |
|-----------|------------|------------|------------|------------|------------|------------|
| YML107C   | 384.938139 | -0.8303544 | 0.18977134 | -4.3755519 | 1.21E-05   | 0.00011143 |
| YML111W   | 556.384299 | 0.70129051 | 0.17221945 | 4.07207503 | 4.66E-05   | 0.00034473 |
| YML115C   | 5246.15177 | -0.6459866 | 0.12650157 | -5.1065501 | 3.28E-07   | 4.90E-06   |
| YML120C   | 297.383589 | 0.61407943 | 0.20316122 | 3.02262131 | 0.00250596 | 0.00975161 |
| YML121W   | 1461.067   | -0.899726  | 0.14273507 | -6.3034679 | 2.91E-10   | 8.77E-09   |
| YML123C   | 2477.39434 | -4.9624008 | 0.19471283 | -25.485741 | 2.84E-143  | 8.64E-140  |
| YML130C   | 8178.37909 | -0.5943246 | 0.1341866  | -4.4290904 | 9.46E-06   | 9.02E-05   |
| YMR006C   | 666.444911 | 0.91761708 | 0.2695217  | 3.404613   | 0.00066258 | 0.00321522 |
| YMR010W   | 961.960243 | -0.7342628 | 0.1805742  | -4.0662666 | 4.78E-05   | 0.00034884 |
| YMR013W-A | 287.107415 | 2.21806059 | 0.31292377 | 7.08818194 | 1.36E-12   | 6.27E-11   |
| YMR017W   | 61.7905219 | 1.44495666 | 0.32650976 | 4.42546239 | 9.62E-06   | 9.14E-05   |
| YMR038C   | 3610.31263 | -0.8618688 | 0.15139779 | -5.6927438 | 1.25E-08   | 2.70E-07   |
| YMR042W   | 239.876792 | -0.7029403 | 0.21445603 | -3.277783  | 0.00104626 | 0.00468853 |
| YMR053C   | 490.689063 | 0.65113751 | 0.1696433  | 3.83827416 | 0.0001239  | 0.00078764 |
| YMR057C   | 23.8448976 | 1.06858444 | 0.36570022 | 2.92202297 | 0.00347766 | 0.01275072 |
| YMR058W   | 6084.05964 | -3.0429575 | 0.20375236 | -14.934588 | 1.96E-50   | 1.71E-47   |
| YMR075W   | 201.924349 | 0.68861145 | 0.21376464 | 3.22135337 | 0.00127587 | 0.00555399 |
| YMR076C   | 741.176627 | 0.73670766 | 0.15245432 | 4.83231742 | 1.35E-06   | 1.72E-05   |
| YMR079W   | 1961.29764 | -0.7419761 | 0.17122892 | -4.3332406 | 1.47E-05   | 0.00013217 |
| YMR083W   | 24925.5811 | -1.146337  | 0.18071873 | -6.3432108 | 2.25E-10   | 6.89E-09   |
| YMR085W   | 217.090527 | 0.66258948 | 0.20785709 | 3.1877165  | 0.00143401 | 0.00614576 |
| YMR086W   | 924.957584 | 0.59971928 | 0.14840857 | 4.04100166 | 5.32E-05   | 0.00038178 |
| YMR099C   | 4725.26435 | -0.7746468 | 0.1560219  | -4.9649875 | 6.87E-07   | 9.38E-06   |
| YMR108W   | 18560.0464 | -0.7971492 | 0.16823938 | -4.7381843 | 2.16E-06   | 2.55E-05   |
| YMR113W   | 1911.91227 | -0.6094366 | 0.1359973  | -4.4812401 | 7.42E-06   | 7.31E-05   |
| YMR116C   | 100083.94  | -1.2078975 | 0.13553188 | -8.9122759 | 5.00E-19   | 5.86E-17   |
| YMR133W   | 34.9302351 | 1.21507192 | 0.35258921 | 3.44614037 | 0.00056865 | 0.00281096 |
| YMR142C   | 15547.9907 | -0.9871868 | 0.12838049 | -7.6895387 | 1.48E-14   | 1.02E-12   |
| YMR145C   | 2063.47043 | -0.9270805 | 0.17048949 | -5.4377576 | 5.40E-08   | 9.75E-07   |
| YMR157C   | 488.440299 | -0.7355747 | 0.20139248 | -3.6524437 | 0.00025976 | 0.00146474 |
| YMR184W   | 541.67379  | -0.6149693 | 0.20059181 | -3.0657746 | 0.00217107 | 0.00864736 |
| YMR186W   | 118829.938 | -0.6230646 | 0.14898201 | -4.1821464 | 2.89E-05   | 0.00023018 |
| YMR193C-A | 9.54125322 | 1.06217063 | 0.35739067 | 2.97201558 | 0.00295852 | 0.01121878 |
| YMR194C-B | 50.7701534 | -0.9512832 | 0.31946019 | -2.9777832 | 0.00290341 | 0.01103732 |
| YMR194W   | 686.421483 | -0.6869884 | 0.16252292 | -4.2270248 | 2.37E-05   | 0.00019477 |
| YMR200W   | 3354.95309 | -0.5844047 | 0.18509704 | -3.1572881 | 0.00159244 | 0.00671604 |
| YMR209C   | 1895.5627  | -0.7321367 | 0.13952384 | -5.2473951 | 1.54E-07   | 2.51E-06   |
| YMR210W   | 1513.31122 | -0.5928616 | 0.15842073 | -3.7423237 | 0.00018233 | 0.00108434 |
| YMR219W   | 2976.2972  | 0.78662124 | 0.14030445 | 5.60653074 | 2.06E-08   | 4.18E-07   |
| YMR226C   | 2900.18093 | -0.8402407 | 0.19840712 | -4.2349325 | 2.29E-05   | 0.00018891 |
| YMR227C   | 1088.04125 | 0.82171313 | 0.14919892 | 5.50750062 | 3.64E-08   | 7.01E-07   |
| YMR236W   | 739.776666 | -1.0456155 | 0.17787019 | -5.8785314 | 4.14E-09   | 9.85E-08   |
| YMR241W   | 10468.8587 | -1.2558995 | 0.13392116 | -9.3779022 | 6.73E-21   | 1.11E-18   |
| YMR264W   | 3206.87564 | -0.6302445 | 0.13857757 | -4.5479546 | 5.42E-06   | 5.51E-05   |
| YMR265C   | 1099.00097 | -0.9175329 | 0.15572641 | -5.8919544 | 3.82E-09   | 9.22E-08   |
| YMR273C   | 1125.59725 | 0.61072456 | 0.14698338 | 4.15505876 | 3.25E-05   | 0.00025522 |
| YMR280C   | 235.964478 | 1.10359386 | 0.22555799 | 4.89272779 | 9.94E-07   | 1.32E-05   |
| YMR290C   | 3274.95761 | -0.6060315 | 0.13014743 | -4.6564999 | 3.22E-06   | 3.61E-05   |
| YMR291W   | 362.207702 | -0.7447004 | 0.19555931 | -3.8080537 | 0.00014006 | 0.00087308 |
| YMR316C-B | 237.56102  | 0.7675759  | 0.21910154 | 3.50328839 | 0.00045955 | 0.00237175 |
| YMR316W   | 603.059126 | -0.8022935 | 0.17337282 | -4.627562  | 3.70E-06   | 4.02E-05   |
| YMR317W   | 53.6590258 | 1.33322987 | 0.33391185 | 3.99275999 | 6.53E-05   | 0.00045455 |
| YMR318C   | 16876.3298 | -0.7250379 | 0.15175732 | -4.777614  | 1.77E-06   | 2.17E-05   |
| YMR324C   | 17.2396584 | 1.2752212  | 0.37129939 | 3.43448236 | 0.00059369 | 0.00291682 |
| YML001W   | 2598.56644 | -0.8454427 | 0.13650142 | -6.1936551 | 5.88E-10   | 1.64E-08   |
| YML002C   | 9001.83275 | -0.8711407 | 0.13681954 | -6.3670783 | 1.93E-10   | 5.99E-09   |
| YNL010W   | 5187.10238 | -0.6929893 | 0.13147916 | -5.2707158 | 1.36E-07   | 2.27E-06   |
| YNL014W   | 1031.55572 | 0.69238666 | 0.14354554 | 4.82346327 | 1.41E-06   | 1.79E-05   |
| YNL018C   | 9.36174406 | 1.22384521 | 0.35396687 | 3.45751345 | 0.00054519 | 0.00272052 |
| YNL022C   | 3899.23075 | -0.629908  | 0.12891885 | -4.8860815 | 1.03E-06   | 1.36E-05   |
| YNL029C   | 2704.01644 | -0.6609052 | 0.13722579 | -4.8161883 | 1.46E-06   | 1.84E-05   |
| YNL031C   | 9736.20485 | -0.8952949 | 0.13302818 | -6.7301147 | 1.70E-11   | 6.49E-10   |
| YNL042W-B | 41.704838  | 1.17528849 | 0.35507748 | 3.30994942 | 0.00093313 | 0.00425993 |
| YNL052W   | 655.300029 | -0.9742769 | 0.18221764 | -5.346776  | 8.95E-08   | 1.54E-06   |
| YNL062C   | 4353.48996 | -0.7118424 | 0.13614736 | -5.2284705 | 1.71E-07   | 2.72E-06   |

|           |            |            |            |            |            |            |
|-----------|------------|------------|------------|------------|------------|------------|
| YNL067W   | 3829.13313 | -0.7127526 | 0.17885897 | -3.9849977 | 6.75E-05   | 0.00046647 |
| YNL070W   | 114.803919 | 0.79224829 | 0.25537836 | 3.10225302 | 0.00192054 | 0.00779219 |
| YNL075W   | 3548.95524 | -0.7590822 | 0.1487993  | -5.1013824 | 3.37E-07   | 5.02E-06   |
| YNL090W   | 2425.55135 | -0.5858649 | 0.13464529 | -4.351173  | 1.35E-05   | 0.00012345 |
| YNL098C   | 3578.76868 | -0.6506699 | 0.13987124 | -4.651921  | 3.29E-06   | 3.66E-05   |
| YNL108C   | 749.210605 | -0.8509738 | 0.20349416 | -4.1818095 | 2.89E-05   | 0.00023022 |
| YNL119W   | 1707.31981 | -0.6689348 | 0.14188783 | -4.7145326 | 2.42E-06   | 2.81E-05   |
| YNL130C   | 1426.20166 | -0.7093292 | 0.1873258  | -3.7866074 | 0.00015272 | 0.00093755 |
| YNL134C   | 1501.40404 | -1.00878   | 0.20241179 | -4.9838005 | 6.23E-07   | 8.65E-06   |
| YNL141W   | 1872.87361 | -0.8354191 | 0.1626112  | -5.1375249 | 2.78E-07   | 4.24E-06   |
| YNL153C   | 1877.18459 | -0.6180947 | 0.14683672 | -4.2094012 | 2.56E-05   | 0.00020791 |
| YNL155W   | 2764.98253 | -0.7899217 | 0.13561048 | -5.8249305 | 5.71E-09   | 1.32E-07   |
| YNL162W   | 8203.64112 | -0.9122651 | 0.12646028 | -7.2138471 | 5.44E-13   | 2.72E-11   |
| YNL168C   | 945.814187 | -0.6746615 | 0.1869588  | -3.6086105 | 0.00030784 | 0.00169354 |
| YNL178W   | 26340.394  | -1.2023182 | 0.11954396 | -10.05754  | 8.51E-24   | 1.62E-21   |
| YNL182C   | 4218.10463 | -0.7415927 | 0.13457157 | -5.5107681 | 3.57E-08   | 6.91E-07   |
| YNL183C   | 256.000744 | 1.09126648 | 0.20870402 | 5.22877555 | 1.71E-07   | 2.72E-06   |
| YNL194C   | 19.9555668 | 1.34604523 | 0.37156388 | 3.62264825 | 0.0002916  | 0.00161736 |
| YNL204C   | 130.639164 | 0.73797006 | 0.24873009 | 2.9669513  | 0.00300769 | 0.01138397 |
| YNL207W   | 4851.9121  | -0.7322155 | 0.13459451 | -5.4401588 | 5.32E-08   | 9.65E-07   |
| YNL217W   | 3777.19658 | -1.21408   | 0.12998381 | -9.3402402 | 9.61E-21   | 1.54E-18   |
| YNL231C   | 4988.51334 | -1.1411738 | 0.13738668 | -8.3062912 | 9.87E-17   | 9.25E-15   |
| YNL232W   | 3821.48249 | -0.8348437 | 0.12811537 | -6.5163434 | 7.20E-11   | 2.41E-09   |
| YNL241C   | 783.000988 | -0.6638958 | 0.15560902 | -4.2664352 | 1.99E-05   | 0.00016898 |
| YNL251C   | 110.668067 | 1.11690612 | 0.26574186 | 4.20297404 | 2.63E-05   | 0.00021299 |
| YNL253W   | 860.984649 | -0.7767206 | 0.15511605 | -5.0073514 | 5.52E-07   | 7.78E-06   |
| YNL277W   | 1548.72014 | -0.8174182 | 0.18426116 | -4.4361939 | 9.16E-06   | 8.81E-05   |
| YNL278W   | 134.416083 | 0.75483476 | 0.25923323 | 2.91179783 | 0.00359355 | 0.01305801 |
| YNL280C   | 6690.17518 | -0.6668825 | 0.16191603 | -4.1186935 | 3.81E-05   | 0.00029188 |
| YNL281W   | 3170.4064  | -0.7010122 | 0.12894562 | -5.4364947 | 5.43E-08   | 9.79E-07   |
| YNL282W   | 1191.78645 | -0.6527493 | 0.14301399 | -4.5642337 | 5.01E-06   | 5.17E-05   |
| YNL283C   | 216.979682 | 0.96328452 | 0.23706022 | 4.06345908 | 4.84E-05   | 0.00035264 |
| YNL284C   | 3595.21839 | -0.667219  | 0.14579413 | -4.5764461 | 4.73E-06   | 4.94E-05   |
| YNL290W   | 2624.73481 | -0.877264  | 0.1327743  | -6.6071824 | 3.92E-11   | 1.37E-09   |
| YNL302C   | 21141.1886 | -0.7100965 | 0.12071676 | -5.8823352 | 4.05E-09   | 9.66E-08   |
| YNL312W   | 2761.07691 | -0.647777  | 0.12952258 | -5.0012671 | 5.70E-07   | 7.99E-06   |
| YNL318C   | 76.0168975 | 1.76225708 | 0.29935802 | 5.88678759 | 3.94E-09   | 9.44E-08   |
| YNL321W   | 113.859767 | 1.29069117 | 0.27748635 | 4.6513681  | 3.30E-06   | 3.66E-05   |
| YNL324W   | 9.11317589 | 1.02674405 | 0.34910927 | 2.94103918 | 0.00327113 | 0.01214707 |
| YNL336W   | 176.051332 | 0.69635325 | 0.23632308 | 2.94661553 | 0.00321272 | 0.01195934 |
| YNR001C   | 5778.07278 | -1.1856242 | 0.13025064 | -9.1026363 | 8.82E-20   | 1.14E-17   |
| YNR002C   | 28.1456326 | 1.24243777 | 0.36723903 | 3.38318556 | 0.0007165  | 0.00343386 |
| YNR003C   | 2540.19773 | -0.5878179 | 0.1467733  | -4.0049372 | 6.20E-05   | 0.00043424 |
| YNR006W   | 86.1007095 | 0.83009767 | 0.28775275 | 2.88476019 | 0.00391712 | 0.01402425 |
| YNR019W   | 2621.79856 | -0.7789864 | 0.18536542 | -4.2024366 | 2.64E-05   | 0.00021299 |
| YNR027W   | 1843.29669 | -0.6282507 | 0.14155977 | -4.4380592 | 9.08E-06   | 8.76E-05   |
| YNR056C   | 166.28101  | 0.74451025 | 0.22876134 | 3.25452834 | 0.00113581 | 0.00502329 |
| YNR060W   | 330.220132 | -1.4202615 | 0.24894745 | -5.7050656 | 1.16E-08   | 2.56E-07   |
| YNR062C   | 51.1191486 | 0.99009908 | 0.340947   | 2.90396775 | 0.00368466 | 0.01331732 |
| YNR064C   | 54.7222931 | 1.01932656 | 0.35009103 | 2.91160436 | 0.00359578 | 0.01305801 |
| YNR065C   | 1032.75118 | 0.71520101 | 0.22305489 | 3.20639016 | 0.00134412 | 0.00583025 |
| YNR073C   | 50.9211171 | 1.55898569 | 0.32554021 | 4.78891898 | 1.68E-06   | 2.07E-05   |
| YOL010W   | 4446.49689 | -0.9840088 | 0.14485446 | -6.7930855 | 1.10E-11   | 4.43E-10   |
| YOL013W-A | 363.438034 | 0.7788788  | 0.25809445 | 3.01780527 | 0.00254612 | 0.00988266 |
| YOL015W   | 91.0039146 | 0.89836234 | 0.27854355 | 3.22521323 | 0.00125879 | 0.00549536 |
| YOL022C   | 4819.9086  | -0.7387602 | 0.1294604  | -5.7064574 | 1.15E-08   | 2.55E-07   |
| YOL025W   | 73.7029935 | 1.00871929 | 0.28960206 | 3.48312196 | 0.0004956  | 0.00252571 |
| YOL038W   | 3676.23781 | -0.6889944 | 0.14720973 | -4.6803593 | 2.86E-06   | 3.27E-05   |
| YOL039W   | 1466.38662 | -0.6938475 | 0.1608107  | -4.3146849 | 1.60E-05   | 0.00014148 |
| YOL047C   | 26.1372771 | 1.13531814 | 0.37136842 | 3.05712085 | 0.00223474 | 0.00885464 |
| YOL051W   | 155.635064 | 1.0087934  | 0.23180245 | 4.35195318 | 1.35E-05   | 0.0001232  |
| YOL060C   | 662.808863 | 0.79618766 | 0.16758724 | 4.75088472 | 2.03E-06   | 2.43E-05   |
| YOL061W   | 14299.5608 | -0.7980947 | 0.12872678 | -6.1999118 | 5.65E-10   | 1.59E-08   |
| YOL077C   | 1351.71986 | -1.1108938 | 0.16634985 | -6.6780568 | 2.42E-11   | 8.94E-10   |
| YOL077W-A | 139.516929 | 0.71394278 | 0.24825631 | 2.87582936 | 0.00402967 | 0.01437652 |

|         |            |            |            |            |            |            |
|---------|------------|------------|------------|------------|------------|------------|
| YOL084W | 113.283866 | 1.33441976 | 0.26480714 | 5.03921371 | 4.67E-07   | 6.69E-06   |
| YOL086C | 108477.041 | -0.9493089 | 0.12791138 | -7.4216138 | 1.16E-13   | 6.71E-12   |
| YOL089C | 442.951041 | 0.70950053 | 0.17196251 | 4.12590249 | 3.69E-05   | 0.0002836  |
| YOL100W | 270.565939 | 0.82388756 | 0.21972753 | 3.74958734 | 0.00017713 | 0.00105755 |
| YOL104C | 484.730195 | -0.6333754 | 0.20369079 | -3.1094943 | 0.00187408 | 0.00765983 |
| YOL109W | 32445.8902 | -0.894219  | 0.1191364  | -7.5058419 | 6.10E-14   | 3.83E-12   |
| YOL117W | 665.935931 | 0.66048233 | 0.19624263 | 3.36564136 | 0.00076366 | 0.0036164  |
| YOL120C | 10060.8856 | -0.9204607 | 0.12245011 | -7.5170264 | 5.60E-14   | 3.55E-12   |
| YOL124C | 2335.55243 | -0.6089355 | 0.13337871 | -4.5654622 | 4.98E-06   | 5.16E-05   |
| YOL125W | 3621.08785 | -0.6904881 | 0.12554193 | -5.5000591 | 3.80E-08   | 7.25E-07   |
| YOL126C | 334.750003 | 0.67702855 | 0.21478951 | 3.15205594 | 0.00162125 | 0.00681396 |
| YOL128C | 890.590487 | -0.736279  | 0.16026137 | -4.5942387 | 4.34E-06   | 4.59E-05   |
| YOL132W | 70.4445555 | 0.94542809 | 0.29883477 | 3.16371513 | 0.00155769 | 0.0065969  |
| YOL151W | 1844.331   | -1.7658028 | 0.13687987 | -12.900383 | 4.48E-38   | 2.27E-35   |
| YOL154W | 253.542332 | 0.58842302 | 0.20270408 | 2.90286715 | 0.00369763 | 0.01335053 |
| YOL158C | 6108.29449 | -1.3616327 | 0.12348309 | -11.026876 | 2.84E-28   | 7.85E-26   |
| YOL166C | 22.1734764 | 1.32748918 | 0.36806497 | 3.6066708  | 0.00031015 | 0.00170471 |
| YOR004W | 2964.4179  | -0.8298702 | 0.1442686  | -5.7522582 | 8.81E-09   | 1.99E-07   |
| YOR011W | 668.410952 | 0.58501327 | 0.1715526  | 3.41011009 | 0.00064937 | 0.00316119 |
| YOR023C | 51.5745128 | 0.97525203 | 0.32031044 | 3.04470888 | 0.00232906 | 0.00917461 |
| YOR057W | 1143.11504 | -0.702204  | 0.17080123 | -4.1112347 | 3.94E-05   | 0.00029959 |
| YOR061W | 1401.60679 | -0.7058706 | 0.14058264 | -5.0210368 | 5.14E-07   | 7.31E-06   |
| YOR063W | 215346.851 | -0.8752812 | 0.14508602 | -6.0328432 | 1.61E-09   | 4.18E-08   |
| YOR081C | 69.4396748 | 1.13373235 | 0.30148177 | 3.76053362 | 0.00016955 | 0.00101932 |
| YOR092W | 182.303594 | 0.70295253 | 0.2325943  | 3.02222598 | 0.00250923 | 0.00975812 |
| YOR095C | 3093.46177 | -0.8975224 | 0.13166891 | -6.8165092 | 9.33E-12   | 3.81E-10   |
| YOR096W | 39228.9428 | -0.9887797 | 0.12782583 | -7.7353671 | 1.03E-14   | 7.39E-13   |
| YOR099W | 7673.0323  | -0.9551559 | 0.13155525 | -7.2604924 | 3.86E-13   | 2.04E-11   |
| YOR101W | 1280.31286 | -0.7453762 | 0.14531047 | -5.1295426 | 2.90E-07   | 4.39E-06   |
| YOR108W | 5303.49915 | -0.8206287 | 0.12494784 | -6.5677703 | 5.11E-11   | 1.76E-09   |
| YOR111W | 602.365585 | -0.6275515 | 0.19685602 | -3.1878706 | 0.00143325 | 0.00614576 |
| YOR113W | 245.989533 | 0.85737751 | 0.23794333 | 3.60328456 | 0.00031422 | 0.00172087 |
| YOR115C | 2786.69564 | -0.7592257 | 0.14078632 | -5.3927516 | 6.94E-08   | 1.22E-06   |
| YOR129C | 272.988082 | 0.62374646 | 0.2040112  | 3.05741286 | 0.00223257 | 0.00885177 |
| YOR131C | 1635.2654  | -0.7090623 | 0.16536374 | -4.2878945 | 1.80E-05   | 0.00015603 |
| YOR134W | 28.412875  | 1.04683285 | 0.36040353 | 2.90461319 | 0.00367707 | 0.01331732 |
| YOR145C | 1815.67715 | -0.8605942 | 0.15733957 | -5.4696618 | 4.51E-08   | 8.45E-07   |
| YOR155C | 2138.84632 | -0.7402216 | 0.17846972 | -4.1476032 | 3.36E-05   | 0.00026165 |
| YOR157C | 1607.02841 | -1.0665313 | 0.15074567 | -7.0750374 | 1.49E-12   | 6.74E-11   |
| YOR161C | 974.662798 | -0.9494347 | 0.14937952 | -6.3558558 | 2.07E-10   | 6.41E-09   |
| YOR178C | 33.3542103 | 1.3127424  | 0.36576479 | 3.58903441 | 0.00033191 | 0.00179991 |
| YOR184W | 17237.8824 | -0.7975109 | 0.16891191 | -4.7214602 | 2.34E-06   | 2.73E-05   |
| YOR187W | 11459.4857 | -0.6683244 | 0.14082925 | -4.7456361 | 2.08E-06   | 2.48E-05   |
| YOR189W | 499.579559 | -0.6885406 | 0.17548166 | -3.9237185 | 8.72E-05   | 0.00058352 |
| YOR190W | 162.578619 | 0.71554767 | 0.2309664  | 3.09805954 | 0.00194792 | 0.00787183 |
| YOR195W | 2482.05354 | 0.67688437 | 0.13771094 | 4.9152549  | 8.87E-07   | 1.19E-05   |
| YOR202W | 253.694698 | 2.19703471 | 0.36875433 | 5.95799024 | 2.55E-09   | 6.32E-08   |
| YOR203W | 14.808512  | 1.46181229 | 0.36127896 | 4.04621484 | 5.21E-05   | 0.00037515 |
| YOR208W | 105.320128 | 0.86118619 | 0.26062141 | 3.30435701 | 0.00095195 | 0.00433609 |
| YOR209C | 3148.52566 | -0.6721035 | 0.12836567 | -5.235851  | 1.64E-07   | 2.63E-06   |
| YOR219C | 987.843373 | 0.91160684 | 0.14605602 | 6.24148746 | 4.33E-10   | 1.26E-08   |
| YOR221C | 62.1725055 | 0.97539921 | 0.31021376 | 3.14428093 | 0.00166496 | 0.00695922 |
| YOR226C | 303.158858 | -1.3353797 | 0.19333649 | -6.9070235 | 4.95E-12   | 2.04E-10   |
| YOR234C | 9100.177   | -0.7470931 | 0.12637934 | -5.9115129 | 3.39E-09   | 8.32E-08   |
| YOR237W | 113.548854 | 1.07519447 | 0.25641225 | 4.19322579 | 2.75E-05   | 0.00022066 |
| YOR246C | 6900.43124 | -0.6098252 | 0.12655516 | -4.8186517 | 1.45E-06   | 1.83E-05   |
| YOR251C | 1501.76922 | -0.636574  | 0.15535109 | -4.0976473 | 4.17E-05   | 0.00031419 |
| YOR253W | 2535.88514 | -0.6806529 | 0.13246257 | -5.1384547 | 2.77E-07   | 4.23E-06   |
| YOR261C | 12882.751  | -0.7079152 | 0.12364025 | -5.7256041 | 1.03E-08   | 2.30E-07   |
| YOR264W | 1484.03859 | -0.6131137 | 0.14892319 | -4.116979  | 3.84E-05   | 0.00029369 |
| YOR267C | 89.7116657 | 1.04767024 | 0.31037785 | 3.37546712 | 0.0007369  | 0.0035088  |
| YOR269W | 644.934723 | -0.6839843 | 0.16188197 | -4.2252041 | 2.39E-05   | 0.00019593 |
| YOR271C | 2599.32993 | -1.4208288 | 0.15441447 | -9.201397  | 3.53E-20   | 5.12E-18   |
| YOR272W | 4579.15668 | -0.8166227 | 0.13919609 | -5.8667072 | 4.45E-09   | 1.05E-07   |
| YOR276W | 2557.69195 | -0.6340167 | 0.13871154 | -4.5707568 | 4.86E-06   | 5.06E-05   |
| YOR283W | 2388.62002 | -0.5930704 | 0.13141984 | -4.5127921 | 6.40E-06   | 6.38E-05   |

|           |            |            |            |            |            |            |
|-----------|------------|------------|------------|------------|------------|------------|
| YOR284W   | 175.532309 | -0.9599689 | 0.22739201 | -4.2216476 | 2.43E-05   | 0.00019878 |
| YOR294W   | 1674.44058 | -0.8870664 | 0.15707163 | -5.647528  | 1.63E-08   | 3.38E-07   |
| YOR298C-A | 5181.66545 | -0.6244425 | 0.17681005 | -3.5317136 | 0.00041288 | 0.0021676  |
| YOR302W   | 48.9675431 | 1.06638392 | 0.34210522 | 3.11712258 | 0.00182626 | 0.0074996  |
| YOR311C   | 950.77863  | -0.6940165 | 0.18396981 | -3.7724479 | 0.00016165 | 0.00098644 |
| YOR312C   | 5724.38618 | -0.7325772 | 0.1229431  | -5.9586684 | 2.54E-09   | 6.32E-08   |
| YOR316C   | 1983.55413 | -1.1092748 | 0.15573742 | -7.1227252 | 1.06E-12   | 5.03E-11   |
| YOR317W   | 10038.5613 | -0.6262118 | 0.13843644 | -4.5234606 | 6.08E-06   | 6.11E-05   |
| YOR323C   | 8878.35285 | -0.6026933 | 0.17013539 | -3.5424334 | 0.00039645 | 0.00209536 |
| YOR326W   | 30203.4196 | 0.66899001 | 0.13997769 | 4.77926156 | 1.76E-06   | 2.16E-05   |
| YOR327C   | 247.311152 | -0.9026    | 0.22271492 | -4.0527144 | 5.06E-05   | 0.00036617 |
| YOR332W   | 2097.64133 | -0.9697568 | 0.14940384 | -6.4908424 | 8.54E-11   | 2.84E-09   |
| YOR340C   | 4401.2137  | -0.7110208 | 0.13435973 | -5.2919187 | 1.21E-07   | 2.06E-06   |
| YOR349W   | 74.5207236 | 0.88809847 | 0.29799392 | 2.98025697 | 0.00288007 | 0.01097597 |
| YOR360C   | 4513.44385 | -0.6780064 | 0.14209833 | -4.7713891 | 1.83E-06   | 2.23E-05   |
| YOR363C   | 447.203731 | 0.63323642 | 0.19482518 | 3.2502801  | 0.00115291 | 0.00509155 |
| YOR365C   | 53.839357  | 1.46648859 | 0.33277132 | 4.40689594 | 1.05E-05   | 9.86E-05   |
| YOR375C   | 46073.6761 | -1.9192329 | 0.17016155 | -11.278887 | 1.67E-29   | 5.98E-27   |
| YOR382W   | 90.6335355 | -1.3210642 | 0.29717556 | -4.4453998 | 8.77E-06   | 8.48E-05   |
| YOR384W   | 282.82396  | -1.0621339 | 0.25517298 | -4.1624073 | 3.15E-05   | 0.00024874 |
| YOR388C   | 129.094852 | 1.0822687  | 0.2875444  | 3.76383163 | 0.00016733 | 0.00100838 |
| YOR394C-A | 8.24706207 | 1.09660907 | 0.3471675  | 3.15873194 | 0.00158457 | 0.00669057 |
| YPL016W   | 103.378855 | 1.07516526 | 0.27474875 | 3.9132671  | 9.11E-05   | 0.00060671 |
| YPL018W   | 757.704908 | -1.2697732 | 0.15781719 | -8.0458488 | 8.56E-16   | 6.69E-14   |
| YPL019C   | 27241.4706 | -3.4023506 | 0.12609591 | -26.982243 | 2.39E-160  | 1.45E-156  |
| YPL028W   | 18415.938  | -1.0141644 | 0.16934121 | -5.9888814 | 2.11E-09   | 5.36E-08   |
| YPL031C   | 974.029637 | -0.7260307 | 0.15139042 | -4.7957509 | 1.62E-06   | 2.01E-05   |
| YPL032C   | 222.806408 | 0.74233844 | 0.22983384 | 3.22989179 | 0.00123837 | 0.00542362 |
| YPL033C   | 49.7376489 | 1.07257448 | 0.36229578 | 2.96049397 | 0.00307146 | 0.01156069 |
| YPL038W   | 371.557591 | -0.6356927 | 0.18094932 | -3.5130982 | 0.00044291 | 0.00230609 |
| YPL048W   | 8738.79409 | -0.8803198 | 0.12188871 | -7.2223242 | 5.11E-13   | 2.62E-11   |
| YPL052W   | 1219.97693 | -0.6286331 | 0.2125301  | -2.9578545 | 0.00309788 | 0.01164575 |
| YPL061W   | 9761.39715 | -0.6900469 | 0.14561216 | -4.7389372 | 2.15E-06   | 2.55E-05   |
| YPL067C   | 173.549084 | -0.7718628 | 0.24171956 | -3.1932161 | 0.00140698 | 0.00605975 |
| YPL078C   | 5088.63393 | -0.6361341 | 0.12259777 | -5.18879   | 2.12E-07   | 3.31E-06   |
| YPL079W   | 3567.08274 | -0.6933645 | 0.14898818 | -4.6538218 | 3.26E-06   | 3.65E-05   |
| YPL083C   | 490.215606 | -0.7735112 | 0.17613115 | -4.3916777 | 1.12E-05   | 0.00010442 |
| YPL085W   | 510.85649  | 0.62397495 | 0.17713984 | 3.52249912 | 0.0004275  | 0.00223665 |
| YPL090C   | 24909.2811 | -0.9616984 | 0.13185663 | -7.2935158 | 3.02E-13   | 1.63E-11   |
| YPL091W   | 8184.7781  | -0.7111188 | 0.12966749 | -5.4841716 | 4.15E-08   | 7.83E-07   |
| YPL093W   | 4005.78655 | -0.6314669 | 0.13241087 | -4.7689961 | 1.85E-06   | 2.24E-05   |
| YPL099C   | 759.815935 | -0.7072157 | 0.19353764 | -3.6541509 | 0.00025803 | 0.00145908 |
| YPL111W   | 12040.2028 | -1.2285178 | 0.12993143 | -9.455124  | 3.23E-21   | 5.46E-19   |
| YPL112C   | 518.99201  | -0.5844139 | 0.17763844 | -3.2899068 | 0.00100221 | 0.00452839 |
| YPL117C   | 7151.85241 | -0.827554  | 0.14176655 | -5.8374419 | 5.30E-09   | 1.24E-07   |
| YPL118W   | 4034.01102 | -0.5996762 | 0.14641214 | -4.0958095 | 4.21E-05   | 0.0003163  |
| YPL137C   | 2289.42677 | 0.61296971 | 0.13338203 | 4.59559428 | 4.32E-06   | 4.58E-05   |
| YPL141C   | 202.282913 | 0.98528966 | 0.22311361 | 4.41608937 | 1.01E-05   | 9.46E-05   |
| YPL149W   | 1118.37674 | -0.8017857 | 0.15441127 | -5.1925339 | 2.07E-07   | 3.26E-06   |
| YPL164C   | 397.798814 | 0.72408352 | 0.18264298 | 3.96447487 | 7.36E-05   | 0.00050447 |
| YPL166W   | 77.3906229 | 0.85553239 | 0.28728124 | 2.97803088 | 0.00290107 | 0.01103732 |
| YPL173W   | 644.725968 | -0.635743  | 0.1789545  | -3.5525396 | 0.00038153 | 0.00202242 |
| YPL178W   | 1802.7213  | -0.7557516 | 0.16264171 | -4.6467271 | 3.37E-06   | 3.73E-05   |
| YPL183C   | 9414.2324  | -0.6345098 | 0.1330324  | -4.7695886 | 1.85E-06   | 2.24E-05   |
| YPL189C-A | 190.108845 | -0.730699  | 0.2264649  | -3.2265444 | 0.00125295 | 0.00547771 |
| YPL218W   | 1596.89576 | -0.585181  | 0.13684334 | -4.2762845 | 1.90E-05   | 0.00016323 |
| YPL219W   | 105.843564 | 0.98688049 | 0.26428386 | 3.73416861 | 0.00018834 | 0.00110847 |
| YPL248C   | 53.7095536 | 1.13901204 | 0.33845834 | 3.36529462 | 0.00076462 | 0.00361813 |
| YPL253C   | 180.673294 | 0.71154423 | 0.22593807 | 3.14928879 | 0.00163668 | 0.00685844 |
| YPL264C   | 282.560908 | 0.87949028 | 0.26029877 | 3.3787723  | 0.0007281  | 0.00347232 |
| YPL265W   | 6450.27387 | -0.6439306 | 0.14025427 | -4.5911653 | 4.41E-06   | 4.65E-05   |
| YPL266W   | 3216.15652 | -0.684394  | 0.13116211 | -5.2179243 | 1.81E-07   | 2.87E-06   |
| YPL272C   | 167.757552 | 0.73094    | 0.22823822 | 3.20253103 | 0.00136226 | 0.00588796 |
| YPL274W   | 8786.27444 | -0.9742963 | 0.1212     | -8.038748  | 9.08E-16   | 7.00E-14   |
| YPR002C-A | 75.2021471 | 0.84622956 | 0.29362003 | 2.88205662 | 0.00395089 | 0.01412854 |



|           |            |            |            |            |            |            |
|-----------|------------|------------|------------|------------|------------|------------|
| YPR002W   | 972.779365 | -1.0232065 | 0.17089692 | -5.9872733 | 2.13E-09   | 5.39E-08   |
| YPR004C   | 975.786054 | -0.6224577 | 0.17371648 | -3.5831814 | 0.00033943 | 0.00183259 |
| YPR007C   | 137.182339 | 0.94490052 | 0.25264007 | 3.74010551 | 0.00018394 | 0.00109076 |
| YPR008W   | 310.238974 | 0.68784612 | 0.20219062 | 3.40196853 | 0.00066902 | 0.00323618 |
| YPR018W   | 1115.56488 | 0.70770514 | 0.14615506 | 4.84215281 | 1.28E-06   | 1.66E-05   |
| YPR023C   | 3175.27486 | -0.6556567 | 0.14451433 | -4.536967  | 5.71E-06   | 5.76E-05   |
| YPR026W   | 1204.18497 | 0.72682608 | 0.16273883 | 4.46621182 | 7.96E-06   | 7.78E-05   |
| YPR030W   | 77.6108307 | 1.00936484 | 0.30510151 | 3.30829185 | 0.00093867 | 0.00428202 |
| YPR035W   | 12596.0103 | -0.8981288 | 0.13735785 | -6.5386054 | 6.21E-11   | 2.11E-09   |
| YPR036W   | 10248.8081 | -0.754092  | 0.15162961 | -4.97325   | 6.58E-07   | 9.07E-06   |
| YPR041W   | 16197.5585 | -0.8898723 | 0.13178047 | -6.7526867 | 1.45E-11   | 5.63E-10   |
| YPR060C   | 2670.62568 | -0.6355675 | 0.13031267 | -4.8772498 | 1.08E-06   | 1.41E-05   |
| YPR069C   | 8610.44309 | -1.1016481 | 0.12634285 | -8.7195133 | 2.79E-18   | 2.99E-16   |
| YPR074C   | 9073.33449 | -0.6696857 | 0.12842748 | -5.2145045 | 1.84E-07   | 2.92E-06   |
| YPR080W   | 27890.7555 | -0.8508167 | 0.1359595  | -6.2578689 | 3.90E-10   | 1.15E-08   |
| YPR102C   | 10731.6795 | -0.9373985 | 0.12418018 | -7.5486965 | 4.40E-14   | 2.85E-12   |
| YPR103W   | 11024.5662 | -0.7529701 | 0.12287775 | -6.1277989 | 8.91E-10   | 2.36E-08   |
| YPR108W-A | 25.2944291 | 1.13821468 | 0.36774049 | 3.09515738 | 0.00196708 | 0.00793873 |
| YPR110C   | 11180.9366 | -0.8193198 | 0.12306666 | -6.6575288 | 2.78E-11   | 1.02E-09   |
| YPR118W   | 8019.12824 | -0.8657106 | 0.12448291 | -6.9544533 | 3.54E-12   | 1.52E-10   |
| YPR127W   | 1044.38119 | -0.6362022 | 0.15464925 | -4.1138397 | 3.89E-05   | 0.00029697 |
| YPR131C   | 461.783997 | -0.6664092 | 0.19134898 | -3.4826904 | 0.0004964  | 0.00252767 |
| YPR132W   | 40873.6786 | -0.5873248 | 0.13019604 | -4.5110807 | 6.45E-06   | 6.42E-05   |
| YPR138C   | 2686.92631 | -0.8021299 | 0.13608559 | -5.8943043 | 3.76E-09   | 9.13E-08   |
| YPR140W   | 1111.05227 | -0.6988288 | 0.19386745 | -3.604673  | 0.00031255 | 0.00171478 |
| YPR145W   | 43728.8349 | -0.6432238 | 0.19822949 | -3.244844  | 0.00117515 | 0.00518223 |
| YPR160W   | 861.761915 | 0.8297814  | 0.1538036  | 5.3950715  | 6.85E-08   | 1.21E-06   |
| YPR181C   | 379.820578 | 0.59614939 | 0.20663407 | 2.88504893 | 0.00391353 | 0.01401964 |
| YPR184W   | 778.480585 | 0.65093845 | 0.17013361 | 3.82604267 | 0.00013022 | 0.0008218  |
| YPR185W   | 1350.40522 | 0.6173439  | 0.14204708 | 4.34605144 | 1.39E-05   | 0.0001258  |
| YPR191W   | 4473.88805 | -0.5884016 | 0.15492021 | -3.7980941 | 0.00014581 | 0.00090612 |
| YPR194C   | 665.408338 | -1.1257795 | 0.23776693 | -4.7348027 | 2.19E-06   | 2.59E-05   |

Figure S5 Chromosomal regions associated with NLS-Brr6N and NLS-Brr6ACN fragments

| chromosome  | start | end     | B6N_a_avg | B6N_a_max  | B6N_b_avg | B6N_b_max  | B6N_T_avg | B6N_T_max  | deltaCAN_a | deltaCAN_r | deltaCAN_b | deltaCAN_T | deltaCAN_T_r | PIL_a_avg  | PIL_a_max | PIL_b_avg  | PIL_b_max | PIL_T_avg  | PIL_T_max | transcript | B6N_a_norm | B6N_b_norm  | deltaCAN_a_r | deltaCAN_b_r | PIL_a_norm | PIL_b_norm | B6N_a_max_n | B6N_b_max_r | deltaCAN_a_r | deltaCAN_b_r | PIL_a_max_nc | PIL_b_max_norm |            |            |
|-------------|-------|---------|-----------|------------|-----------|------------|-----------|------------|------------|------------|------------|------------|--------------|------------|-----------|------------|-----------|------------|-----------|------------|------------|-------------|--------------|--------------|------------|------------|-------------|-------------|--------------|--------------|--------------|----------------|------------|------------|
| chr4:115568 | chr4  | 1155680 | 1158740   | 974.423563 | 1609.28   | 1041.7182  | 1778.53   | 144.207885 | 254.298    | 222.203549 | 1148.17    | 247.886601 | 1019         | 135.668907 | 240.658   | 180.971773 | 912.126   | 228.513445 | 772.497   | 137.518057 | 236.749    | YBR342CTO   | 6.75707549   | 7.22372566   | 1.63807843 | 1.82741319 | 1.31598553  | 1.66169774  | 6.32832346   | 6.99388119   | 4.77096128   | 4.2424245      | 3.85276203 | 3.26297804 |
| chr2:282280 | chr2  | 282280  | 283780    | 366.692132 | 571.034   | 374.159804 | 552.849   | 128.045444 | 206.069    | 148.61466  | 245.173    | 167.764667 | 309          | 122.059297 | 200.549   | 113.609614 | 197.045   | 152.212479 | 338.17    | 122.040503 | 189.627    | YBR021WTO   | 2.86580805   | 2.9223715    | 1.21794464 | 1.37444528 | 0.93092013  | 1.24722921  | 2.77108153   | 1.68383439   | 1.22250921   | 1.54077058     | 1.0391189  | 1.78334309 |
| chr12:25746 | chr12 | 25746   | 258920    | 372.660264 | 578.277   | 358.850845 | 556.541   | 135.817906 | 241.145    | 136.038039 | 212.369    | 143.486986 | 226          | 135.041734 | 227.65    | 148.945858 | 242.598   | 150.848149 | 258.219   | 144.748192 | 214.91     | YLR057WTO   | 2.74382277   | 2.64214679   | 1.00737776 | 1.06253809 | 1.02899979  | 1.04214185  | 2.39804682   | 2.30791018   | 0.93287503   | 0.99275203     | 1.12883533 | 1.20152157 |
| chr4:115330 | chr4  | 1153300 | 1154120   | 415.531304 | 737.635   | 436.733966 | 828.813   | 151.928412 | 238.222    | 178.467718 | 406.608    | 242.182927 | 565          | 128.446249 | 200.549   | 179.420126 | 380.317   | 179.955533 | 391.11    | 143.653634 | 237.895    | YDR342CTO   | 2.73504671   | 2.87460363   | 1.38943503 | 1.88548072 | 1.24897728  | 1.25277397  | 3.09641847   | 3.47916229   | 2.02747458   | 2.8172666      | 1.59867589 | 1.64404464 |
| chr6:82400  | chr6  | 82400   | 84200     | 309.872603 | 503.427   | 291.067139 | 488.243   | 139.462148 | 239.683    | 287.077878 | 478.261    | 357.110556 | 589          | 128.272776 | 220.061   | 75.218879  | 134.541   | 80.0563661 | 143.695   | 120.069909 | 193.074    | YFL026WTO   | 2.22191187   | 2.10140787   | 2.23802654 | 2.78399335 | 0.62645903  | 0.66674796  | 2.10038676   | 2.03703642   | 2.17331104   | 2.6765306      | 0.69883645 | 0.74424832 |
| chr7:36720  | chr7  | 36720   | 37620     | 613.038217 | 1230.2    | 621.038939 | 1213.68   | 188.764894 | 549.518    | 788.087837 | 2136.64    | 725.568889 | 1908         | 227.19062  | 478.064   | 109.785831 | 195.985   | 110.498848 | 183.671   | 138.387707 | 212.612    | YGL246CTO   | 2.11226657   | 2.15278779   | 3.46962771 | 3.1943824  | 0.79312069  | 0.798473    | 2.2386918    | 2.20862647   | 4.46935975   | 3.99109743     | 0.92179651 | 0.8638788  |
| chr2:381820 | chr2  | 381820  | 383380    | 270.280586 | 538.438   | 294.806888 | 553.772   | 128.204003 | 252.837    | 95.2780839 | 185.607    | 87.0474359 | 177          | 117.12772  | 197.296   | 88.3569887 | 169.501   | 92.6324321 | 173.947   | 125.460649 | 202.268    | YBR073WTO   | 2.10820707   | 2.29951399   | 0.81345461 | 0.7431839  | 0.70426058  | 0.73833854  | 2.12958546   | 2.19023323   | 0.94075399   | 0.89712919     | 0.83800206 | 0.8599828  |
| chr2:84140  | chr2  | 84140   | 86000     | 240.668435 | 344.069   | 264.62581  | 370.105   | 123.944833 | 214.838    | 94.8496882 | 148.485    | 97.2962366 | 165          | 123.991587 | 194.044   | 98.7016871 | 164.204   | 106.498718 | 191.233   | 124.88898  | 195.373    | YBL076CTO   | 1.94173834   | 2.13502897   | 0.76496874 | 0.78470031 | 0.79031542  | 0.85274712  | 1.60152766   | 1.72271665   | 0.76521304   | 0.85032261     | 0.84046414 | 0.97880976 |
| chr3:134820 | chr3  | 134820  | 136900    | 235.715635 | 504.634   | 256.206717 | 541.774   | 122.397164 | 232.376    | 82.2365796 | 188.197    | 78.9682692 | 187          | 113.977807 | 197.296   | 98.318564  | 252.132   | 91.1543172 | 196.636   | 127.146291 | 202.268    | YCR020C-ATI | 1.92982595   | 1.09324063   | 0.74056594 | 0.70521672 | 0.77327727  | 0.71693034  | 1.17162702   | 1.33145419   | 0.95188348   | 0.94781845     | 1.24652441 | 0.97215575 |
| chr9:32340  | chr9  | 32340   | 323460    | 181.700088 | 257.146   | 170.945484 | 232.584   | 110.127953 | 182.686    | 132.233938 | 188.197    | 141.7875   | 205          | 120.518834 | 175.616   | 86.2967781 | 137.126   | 82.844225  | 130.73    | 129.499091 | 201.418    | YML145WTO   | 1.64690879   | 1.55225273   | 1.09720558 | 1.17647587 | 0.66902574  | 0.63972824  | 1.40785846   | 1.37115533   | 1.07163926   | 1.16731961     | 0.62494961 | 0.64266682 |
| chr14:35232 | chr14 | 352320  | 352440    | 191.92405  | 324.753   | 186.344442 | 267.657   | 116.723808 | 165.148    | 180.096008 | 269.345    | 243.716667 | 350          | 126.056508 | 175.616   | 109.398575 | 175.857   | 103.584791 | 144.776   | 140.764075 | 191.925    | YNL145WTO   | 1.644425795  | 1.59645615   | 1.42869266 | 1.93339217 | 0.77717681  | 0.73587519  | 1.96643617   | 1.62070991   | 1.53371561   | 1.99298469     | 0.9162798  | 0.75433633 |

A

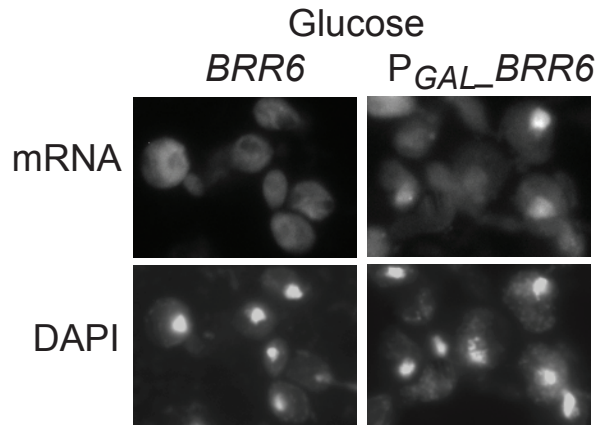

B

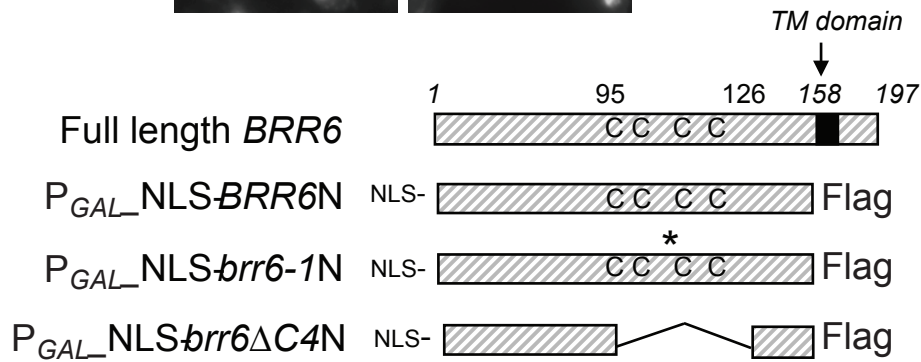

C

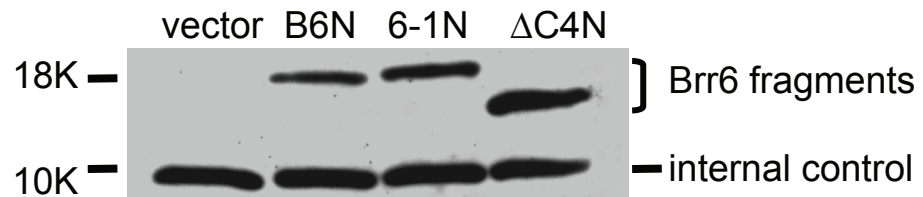

D

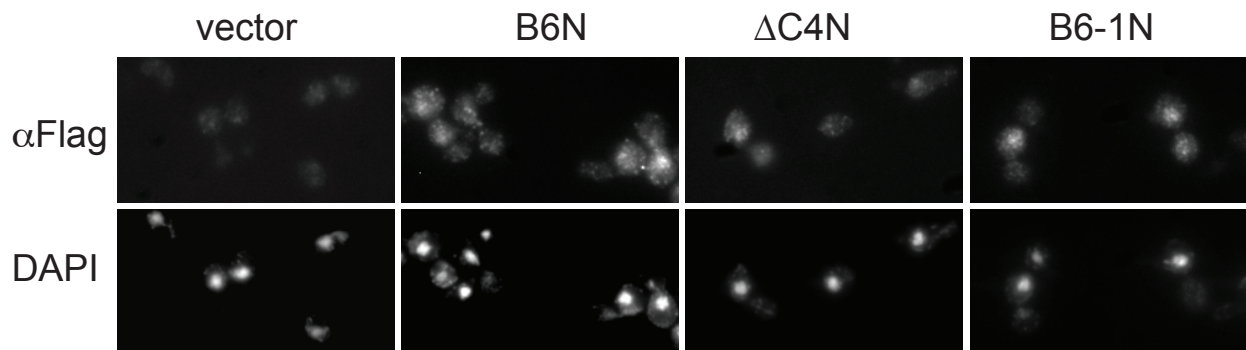

E

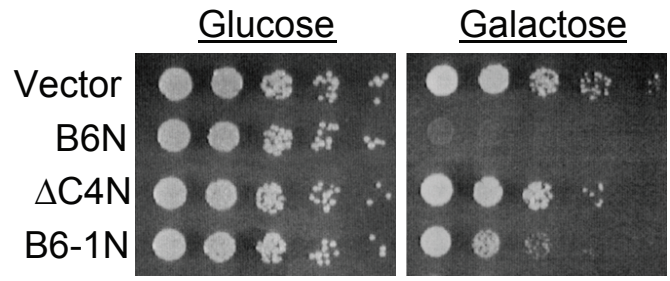

F

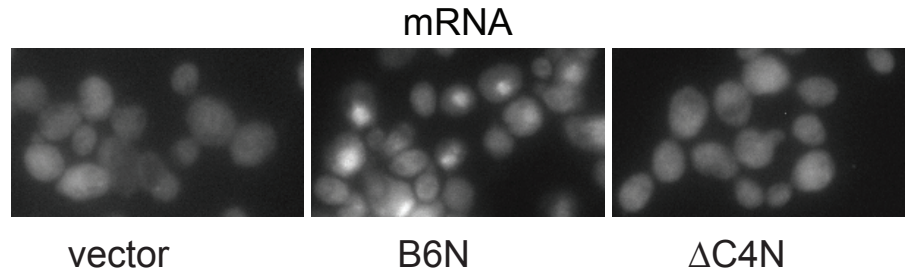

**Figure S1. Effects of BRR6 shutoff and P<sub>GAL</sub>-NLS-BRRN, *brr6-1N* and *brr6ΔC4N* fragment expression**

Panel A: dT50 *in situ* hybridization of *BRR6* versus P<sub>GAL</sub>-*BRR6* cells following a 6hr shift from galactose to glucose. Panel B: Diagram of Full length Brr6 and Brr6 fragments. Panel C: Western Blot detection of FLAG-tagged B6N (P<sub>GAL</sub>-NLS-Brr6N-FLAG), B6-1N (P<sub>GAL</sub>-NLS-Brr6-1N-FLAG) and ΔC4N (P<sub>GAL</sub>-NLS-Brr6ΔC4N-FLAG) fragments in wild type cell extracts (W303) prepared following galactose induction. Panel D: Detection of fragments by immunofluorescence using anti-FLAG antibody. Panel E: Effect of fragments on growth on plates containing glucose or galactose. Panel F: dT50 *in situ* hybridization of cells expressing B6N and ΔC4N fragments.

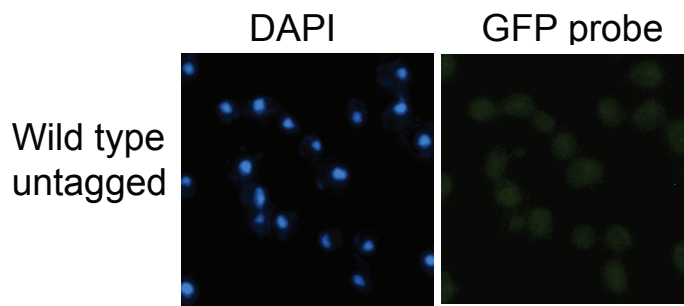

**Figure S2. Untagged control for single molecule *in situ* hybridization**

Single molecule FISH of fixed untagged wildtype cells using probe against *GFP* RNA sequence.

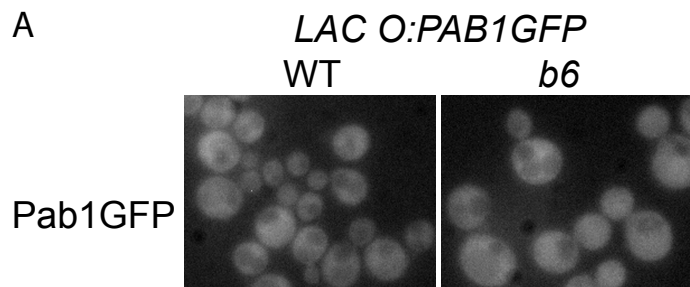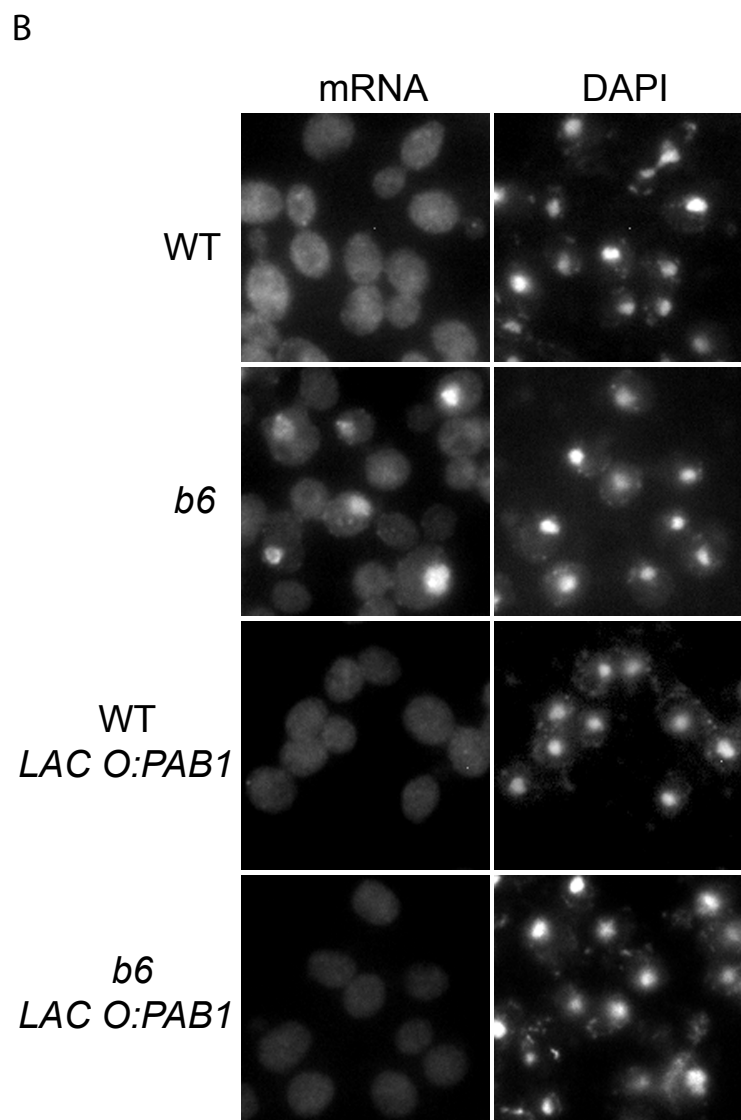



**Figure S3. Pab1GFP signal and Bulk mRNA Export in *LAC O:PAB1* strains.**

Panel A: Fluorescence microscopy localizing of GFP-tagged Pab1 in live *LAC O:PAB1GFP* WT (wild type, yDBK400) and *b6* (*brr6-1*, yDBK401) cells. Panel B: dT50 FISH detection of poly A mRNA in WT (wild type, yDBK165 and yDBK521) and *b6* (*brr6-1*, yDBK166 and yDBK522) cells +/- *LAC O:PAB1*. The nucleus is identified by DAPI staining.

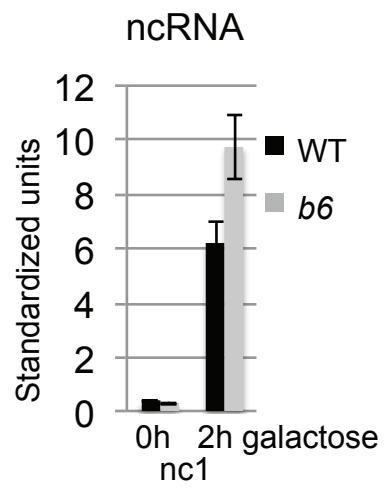

**Figure S4. Detection of *GAL7* non-coding RNA (nc1).**

DN9 primed RT QPCR of *GAL7* nc1 transcript before and after galactose induction in WT (wild type, yDBK165) and *b6* (*brr6-1*, yDBK166). QPCR data was normalized as in Figure 2 and expressed either as standardized units or relative to wild type. For comparison, the antisense RNA levels were approximately 0.05% of the *GAL7* 5' ORF transcript in RNA the same samples. Error bars (SEM) reflect  $\geq 3$  biological replicates.

A

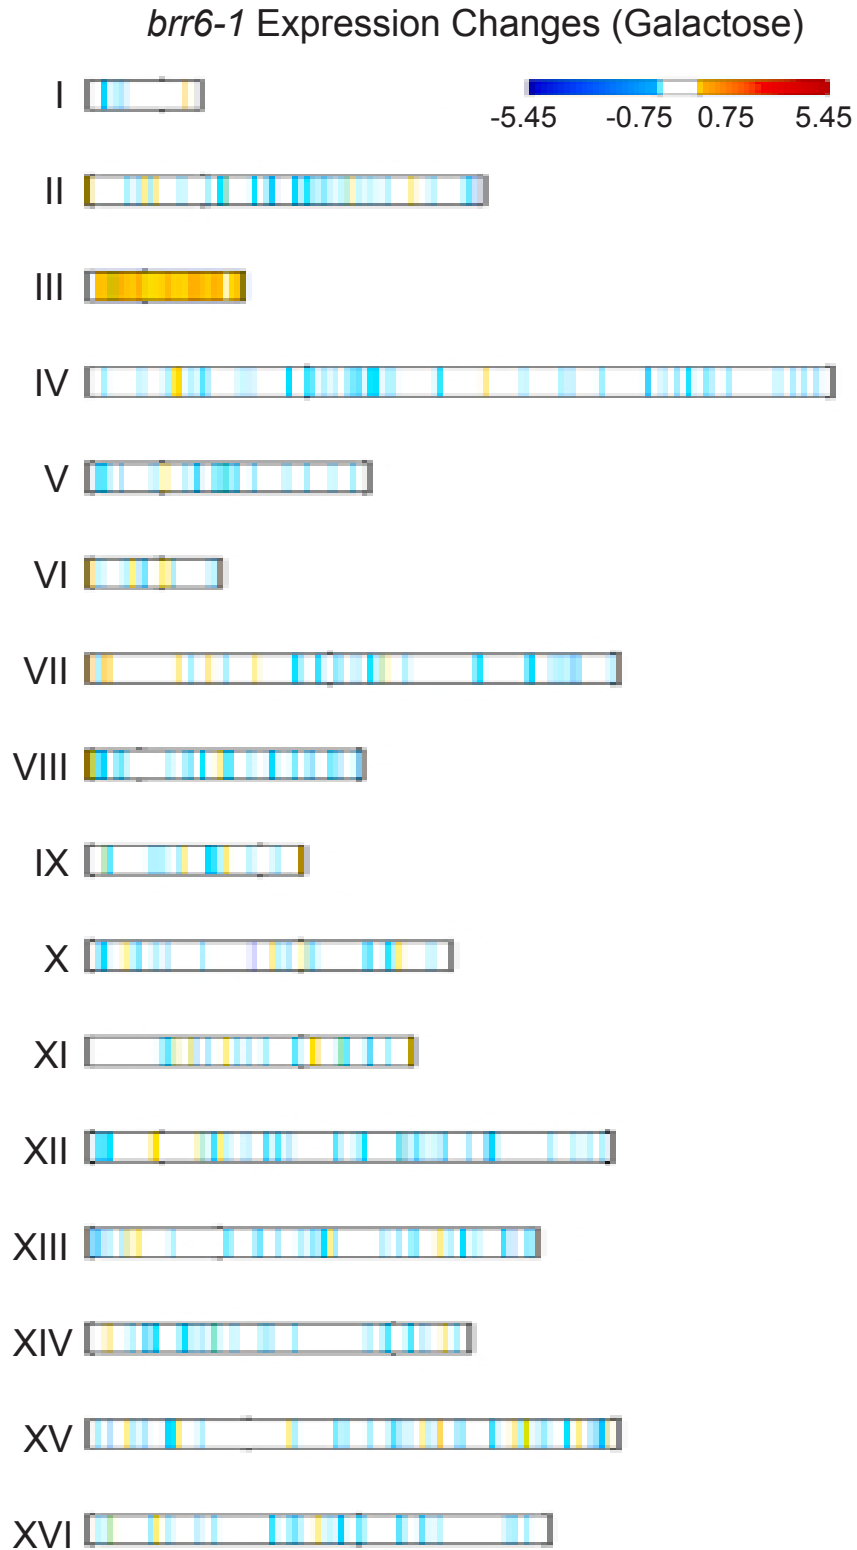

B

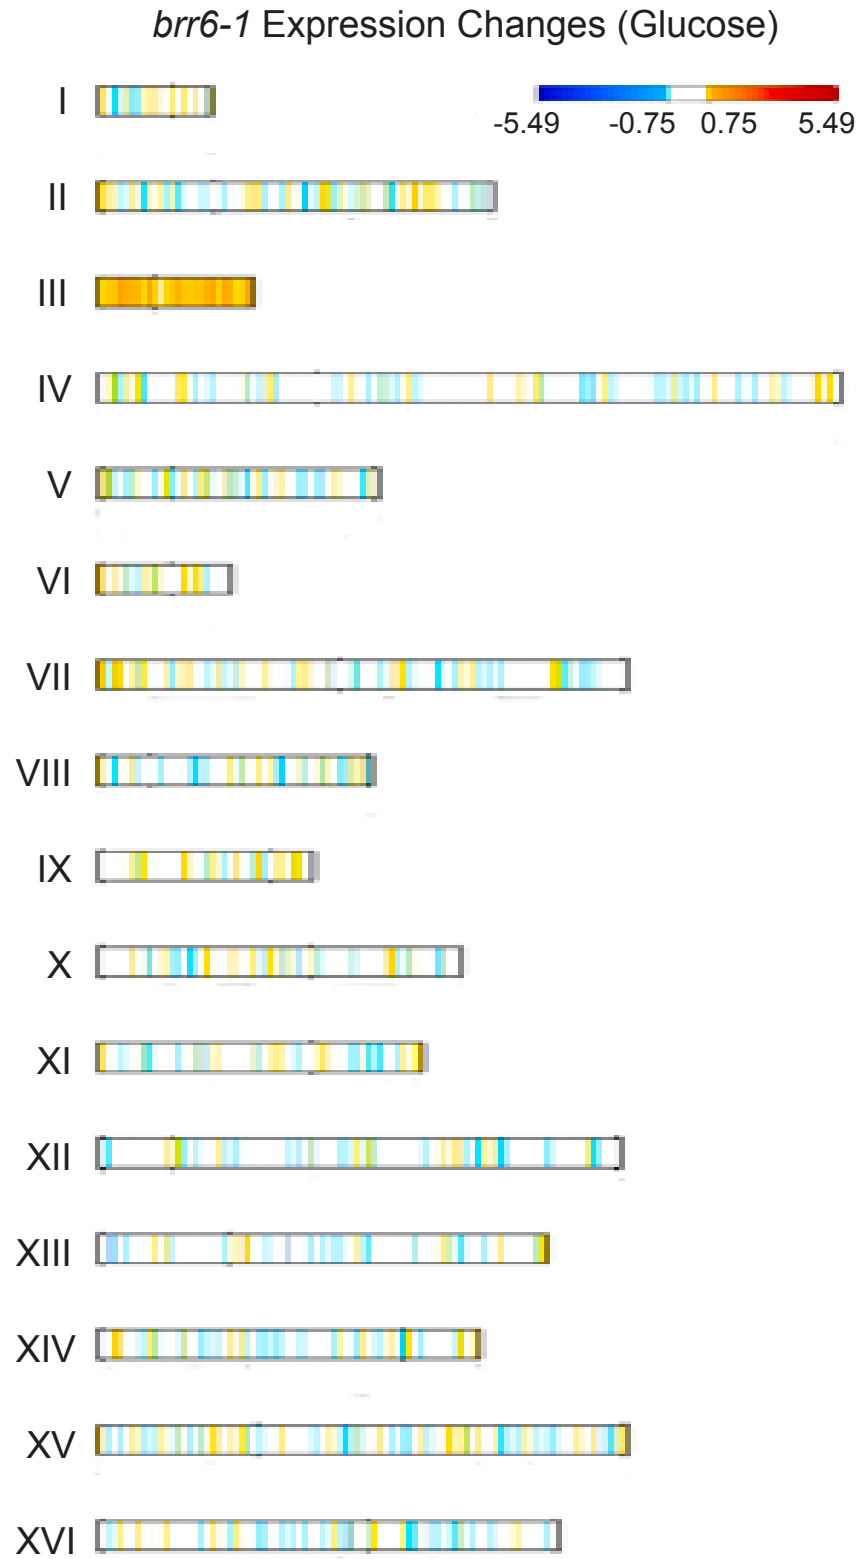

**Figure S5. Mapping of sense transcripts affected in *brr6-1*.**

Panels A and B: Mapping of positions of *brr6-1*-affected sense transcripts from RNAseq analysis on all chromosomes (A) following 2h galactose induction and (B) in glucose samples. Tick marks above chromosomes indicate positions of telomeres and centromeres.

A

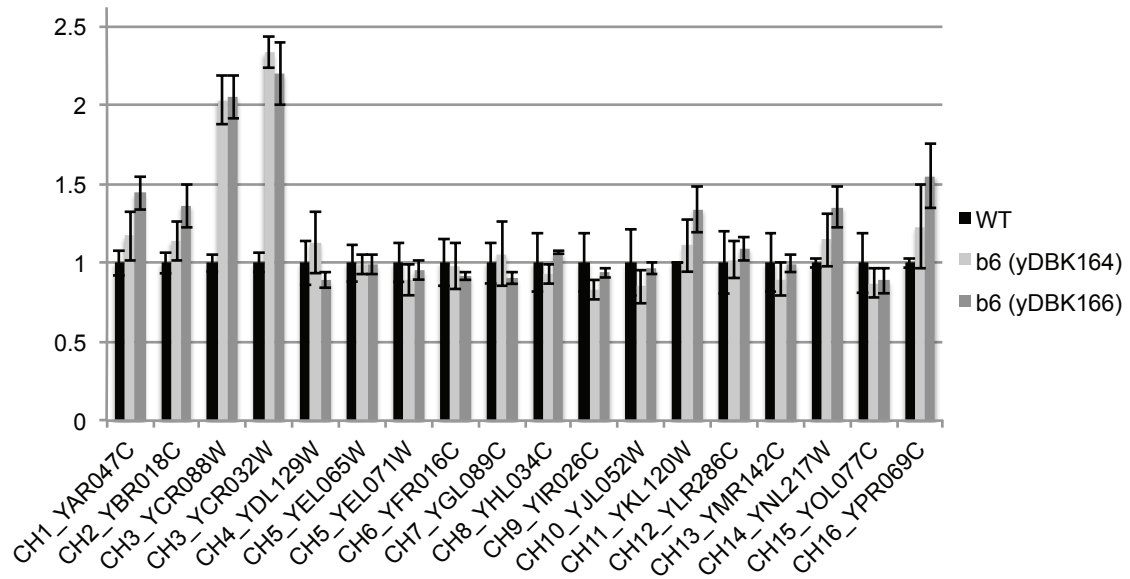

B

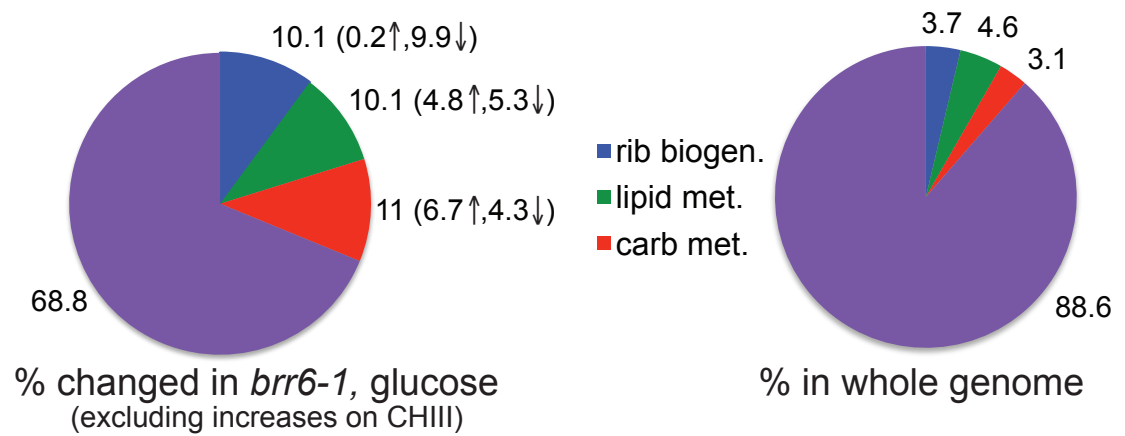

**Figure S6: Detection of *brr6-1* CHIII Disomy and G0-term analysis.**

Panel A: QPCR quantitation of genomic DNA from wild type (yPH399) and two independently generated *brr6-1* strains (yDBK164 and yDBK166) using 2 primer sets for CHIII and CHIV and single primer sets for other chromosomes. Panel B: G0 term analysis of RNAseq results (terms: ribosome biogenesis, carbohydrate metabolism and lipid metabolism) for gene expression changes in *brr6-1* versus whole genome representation. Direction of *brr6-1* changes indicated by arrows. Values obtained using Saccharomyces Cerevisiae Genome database SlimMapper tool.



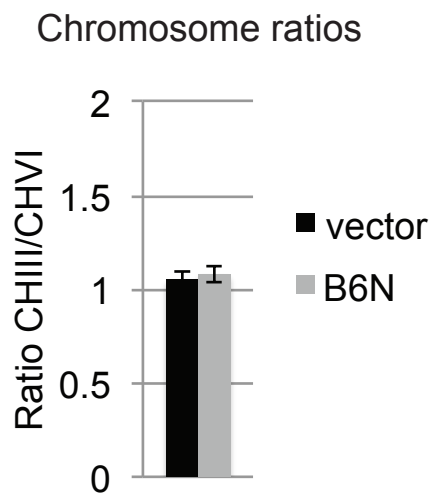

**Figure S7. QPCR analysis of Chromosome III copy number in wild type cells expressing the NLS-Brr6N fragment.**

CHIII/CHVI ratio obtained by QPCR of genomic DNA from W303 cells carrying vector (pJL602) or the B6N (pP<sub>GAL</sub>-NLS-BRR6N\_FLAG) fragment construct following induction in galactose O/N. CHVI disomy is lethal in *S. cerevisiae*; therefore CHVI QPCR values reflect a single chromosome.
